# Supplementary material for: GREB1 amplifies androgen receptor output in human prostate cancer and contributes to antiandrogen resistance
Source: eLife. 2019 Jan 15;8:e41913. doi: 10.7554/eLife.41913 (PMC6336405; doi:10.7554/eLife.41913)
Supplement: Figure 1—source data 1. [file elife-41913-fig1-data1.xlsx]

## Sheet: 1
Figure1-source data 1 : GSEA Results (Arsig-lo vs. ARsig-hi)
Top 100 gene sets enriched in ARsig-lo compared to ARsig-hi
NAME	GS<br> follow link to MSigDB	GS DETAILS	SIZE	ES	NES	NOM p-val	FDR q-val	FWER p-val	RANK AT MAX	LEADING EDGE
ROSTY_CERVICAL_CANCER_PROLIFERATION_CLUSTER	ROSTY_CERVICAL_CANCER_PROLIFERATION_CLUSTER	Details ...	136	-0.674755	-2.57967	0	0	0	4420	tags=69%, list=22%, signal=88%
RHODES_UNDIFFERENTIATED_CANCER	RHODES_UNDIFFERENTIATED_CANCER	Details ...	68	-0.661625	-2.40733	0	0	0	4315	tags=62%, list=21%, signal=78%
CROONQUIST_NRAS_SIGNALING_DN	CROONQUIST_NRAS_SIGNALING_DN	Details ...	72	-0.703289	-2.30656	0	0	0	4227	tags=71%, list=21%, signal=89%
ZHOU_CELL_CYCLE_GENES_IN_IR_RESPONSE_6HR	ZHOU_CELL_CYCLE_GENES_IN_IR_RESPONSE_6HR	Details ...	82	-0.669752	-2.28591	0	0	0	4460	tags=72%, list=22%, signal=92%
KANG_DOXORUBICIN_RESISTANCE_UP	KANG_DOXORUBICIN_RESISTANCE_UP	Details ...	53	-0.693386	-2.27591	0	0	0	4420	tags=74%, list=22%, signal=94%
CROONQUIST_IL6_DEPRIVATION_DN	CROONQUIST_IL6_DEPRIVATION_DN	Details ...	97	-0.643105	-2.24859	0	0	0	4330	tags=63%, list=21%, signal=80%
ISHIDA_E2F_TARGETS	ISHIDA_E2F_TARGETS	Details ...	51	-0.676024	-2.24294	0	0	0	4012	tags=63%, list=20%, signal=78%
CHANG_CYCLING_GENES	CHANG_CYCLING_GENES	Details ...	142	-0.586501	-2.22803	0	0	0	4420	tags=61%, list=22%, signal=77%
SOTIRIOU_BREAST_CANCER_GRADE_1_VS_3_UP	SOTIRIOU_BREAST_CANCER_GRADE_1_VS_3_UP	Details ...	146	-0.613544	-2.22597	0	0	0	3567	tags=55%, list=18%, signal=66%
WHITEFORD_PEDIATRIC_CANCER_MARKERS	WHITEFORD_PEDIATRIC_CANCER_MARKERS	Details ...	114	-0.59084	-2.22541	0	0	0	4427	tags=63%, list=22%, signal=80%
MISSIAGLIA_REGULATED_BY_METHYLATION_DN	MISSIAGLIA_REGULATED_BY_METHYLATION_DN	Details ...	116	-0.616978	-2.21614	0	0	0	5369	tags=72%, list=26%, signal=97%
ZHOU_CELL_CYCLE_GENES_IN_IR_RESPONSE_24HR	ZHOU_CELL_CYCLE_GENES_IN_IR_RESPONSE_24HR	Details ...	122	-0.618263	-2.20716	0	0	0	3991	tags=63%, list=20%, signal=78%
NAKAYAMA_SOFT_TISSUE_TUMORS_PCA2_UP	NAKAYAMA_SOFT_TISSUE_TUMORS_PCA2_UP	Details ...	84	-0.6123	-2.20444	0	0	0	3058	tags=52%, list=15%, signal=61%
REICHERT_MITOSIS_LIN9_TARGETS	REICHERT_MITOSIS_LIN9_TARGETS	Details ...	28	-0.756073	-2.1909	0	0	0	2421	tags=71%, list=12%, signal=81%
LEE_EARLY_T_LYMPHOCYTE_UP	LEE_EARLY_T_LYMPHOCYTE_UP	Details ...	96	-0.614187	-2.18286	0	0	0	4159	tags=68%, list=20%, signal=85%
REACTOME_MITOTIC_PROMETAPHASE	REACTOME_MITOTIC_PROMETAPHASE	Details ...	82	-0.602991	-2.17929	0	0	0	5320	tags=59%, list=26%, signal=79%
LY_AGING_OLD_DN	LY_AGING_OLD_DN	Details ...	53	-0.646659	-2.17707	0	0	0	2991	tags=49%, list=15%, signal=57%
LY_AGING_MIDDLE_DN	LY_AGING_MIDDLE_DN		16	-0.859049	-2.14363	0	0	0	2093	tags=88%, list=10%, signal=97%
FARMER_BREAST_CANCER_CLUSTER_2	FARMER_BREAST_CANCER_CLUSTER_2		32	-0.753722	-2.1324	0	0	0	2917	tags=63%, list=14%, signal=73%
PUJANA_XPRSS_INT_NETWORK	PUJANA_XPRSS_INT_NETWORK		165	-0.568267	-2.12275	0	0.000456	0.01	4577	tags=49%, list=22%, signal=63%
EGUCHI_CELL_CYCLE_RB1_TARGETS	EGUCHI_CELL_CYCLE_RB1_TARGETS		23	-0.776824	-2.11585	0	0.000437	0.01	2538	tags=70%, list=12%, signal=79%
HOFFMANN_LARGE_TO_SMALL_PRE_BII_LYMPHOCYTE_UP	HOFFMANN_LARGE_TO_SMALL_PRE_BII_LYMPHOCYTE_UP		160	-0.568218	-2.10944	0	0.00042	0.01	4478	tags=54%, list=22%, signal=69%
BURTON_ADIPOGENESIS_3	BURTON_ADIPOGENESIS_3		101	-0.559424	-2.10487	0	0.000403	0.01	4522	tags=57%, list=22%, signal=73%
PUJANA_BREAST_CANCER_WITH_BRCA1_MUTATED_UP	PUJANA_BREAST_CANCER_WITH_BRCA1_MUTATED_UP		55	-0.665917	-2.09965	0	0.000389	0.01	5250	tags=71%, list=26%, signal=95%
PUJANA_BRCA_CENTERED_NETWORK	PUJANA_BRCA_CENTERED_NETWORK		117	-0.576377	-2.05562	0	0.000736	0.02	5460	tags=55%, list=27%, signal=74%
MORI_IMMATURE_B_LYMPHOCYTE_DN	MORI_IMMATURE_B_LYMPHOCYTE_DN		89	-0.584993	-2.05289	0	0.000711	0.02	4012	tags=55%, list=20%, signal=68%
MORI_LARGE_PRE_BII_LYMPHOCYTE_UP	MORI_LARGE_PRE_BII_LYMPHOCYTE_UP		83	-0.620769	-2.05207	0	0.000687	0.02	4420	tags=64%, list=22%, signal=81%
DUTERTRE_ESTRADIOL_RESPONSE_24HR_UP	DUTERTRE_ESTRADIOL_RESPONSE_24HR_UP		315	-0.483157	-2.05125	0	0.000665	0.02	4422	tags=53%, list=22%, signal=67%
GREENBAUM_E2A_TARGETS_UP	GREENBAUM_E2A_TARGETS_UP		32	-0.732545	-2.04981	0	0.000644	0.02	3371	tags=66%, list=17%, signal=79%
PID_PLK1_PATHWAY	PID_PLK1_PATHWAY		44	-0.656553	-2.04463	0	0.000625	0.02	4330	tags=57%, list=21%, signal=72%
PUJANA_BRCA2_PCC_NETWORK	PUJANA_BRCA2_PCC_NETWORK		402	-0.457226	-2.04328	0	0.000606	0.02	4660	tags=43%, list=23%, signal=54%
REACTOME_DNA_REPLICATION	REACTOME_DNA_REPLICATION		183	-0.507957	-2.04081	0	0.000589	0.02	5416	tags=49%, list=27%, signal=66%
ZHANG_TLX_TARGETS_60HR_DN	ZHANG_TLX_TARGETS_60HR_DN		268	-0.502392	-2.0405	0	0.000573	0.02	4491	tags=46%, list=22%, signal=58%
JEON_SMAD6_TARGETS_DN	JEON_SMAD6_TARGETS_DN		19	-0.703287	-2.04013	0	0.000557	0.02	2335	tags=47%, list=11%, signal=53%
SHEPARD_BMYB_TARGETS	SHEPARD_BMYB_TARGETS		68	-0.613839	-2.02906	0	0.000817	0.03	3085	tags=54%, list=15%, signal=64%
OXFORD_RALA_OR_RALB_TARGETS_UP	OXFORD_RALA_OR_RALB_TARGETS_UP		47	-0.611015	-2.02019	0	0.00132515	0.05	6224	tags=66%, list=31%, signal=95%
WHITFIELD_CELL_CYCLE_LITERATURE	WHITFIELD_CELL_CYCLE_LITERATURE		44	-0.677285	-2.01941	0	0.00129202	0.05	3480	tags=52%, list=17%, signal=63%
REACTOME_PEPTIDE_CHAIN_ELONGATION	REACTOME_PEPTIDE_CHAIN_ELONGATION		86	-0.571014	-2.01417	0	0.00151597	0.06	7055	tags=71%, list=35%, signal=108%
PID_FOXM1PATHWAY	PID_FOXM1PATHWAY		39	-0.644984	-2.0077	0	0.00147988	0.06	3778	tags=51%, list=19%, signal=63%
NIKOLSKY_OVERCONNECTED_IN_BREAST_CANCER	NIKOLSKY_OVERCONNECTED_IN_BREAST_CANCER		20	-0.718738	-1.98199	0	0.00193262	0.08	3006	tags=45%, list=15%, signal=53%
BURTON_ADIPOGENESIS_PEAK_AT_24HR	BURTON_ADIPOGENESIS_PEAK_AT_24HR		42	-0.607951	-1.97684	0	0.00212909	0.09	3567	tags=52%, list=18%, signal=63%
REACTOME_NONSENSE_MEDIATED_DECAY_ENHANCED_BY_THE_EXON_JUNCTION_COMPLEX	REACTOME_NONSENSE_MEDIATED_DECAY_ENHANCED_BY_THE_EXON_JUNCTION_COMPLEX		107	-0.523731	-1.97655	0	0.00208178	0.09	7156	tags=67%, list=35%, signal=103%
KAMMINGA_EZH2_TARGETS	KAMMINGA_EZH2_TARGETS		40	-0.639565	-1.97531	0	0.00203652	0.09	5821	tags=78%, list=29%, signal=108%
REACTOME_MITOTIC_M_M_G1_PHASES	REACTOME_MITOTIC_M_M_G1_PHASES		163	-0.502208	-1.97467	0	0.00199319	0.09	5416	tags=47%, list=27%, signal=64%
KONG_E2F3_TARGETS	KONG_E2F3_TARGETS		95	-0.565448	-1.96345	0	0.00238146	0.11	4224	tags=64%, list=21%, signal=81%
CHEMNITZ_RESPONSE_TO_PROSTAGLANDIN_E2_UP	CHEMNITZ_RESPONSE_TO_PROSTAGLANDIN_E2_UP		138	-0.52137	-1.95983	0	0.00296344	0.14	4894	tags=54%, list=24%, signal=71%
WU_APOPTOSIS_BY_CDKN1A_VIA_TP53	WU_APOPTOSIS_BY_CDKN1A_VIA_TP53		54	-0.577213	-1.9504	0	0.00331614	0.15	5460	tags=65%, list=27%, signal=88%
BENPORATH_PROLIFERATION	BENPORATH_PROLIFERATION		137	-0.518077	-1.94938	0	0.00325112	0.15	5059	tags=54%, list=25%, signal=71%
AMUNDSON_GAMMA_RADIATION_RESPONSE	AMUNDSON_GAMMA_RADIATION_RESPONSE		40	-0.649124	-1.94767	0	0.0031886	0.15	2991	tags=68%, list=15%, signal=79%
FRASOR_RESPONSE_TO_SERM_OR_FULVESTRANT_DN	FRASOR_RESPONSE_TO_SERM_OR_FULVESTRANT_DN		50	-0.59143	-1.94174	0	0.00332967	0.16	5413	tags=72%, list=27%, signal=98%
LI_WILMS_TUMOR_ANAPLASTIC_UP	LI_WILMS_TUMOR_ANAPLASTIC_UP		19	-0.695282	-1.93895	0	0.00345539	0.17	2106	tags=53%, list=10%, signal=59%
PID_AURORA_B_PATHWAY	PID_AURORA_B_PATHWAY		37	-0.705705	-1.93595	0	0.00358054	0.18	2629	tags=65%, list=13%, signal=74%
REN_BOUND_BY_E2F	REN_BOUND_BY_E2F		61	-0.592255	-1.93083	0	0.00388674	0.2	5048	tags=59%, list=25%, signal=78%
KOBAYASHI_EGFR_SIGNALING_24HR_DN	KOBAYASHI_EGFR_SIGNALING_24HR_DN		240	-0.475325	-1.91527	0	0.00474936	0.23	4420	tags=50%, list=22%, signal=64%
WONG_EMBRYONIC_STEM_CELL_CORE	WONG_EMBRYONIC_STEM_CELL_CORE		332	-0.465275	-1.91116	0	0.00485076	0.24	6038	tags=49%, list=30%, signal=69%
LY_AGING_PREMATURE_DN	LY_AGING_PREMATURE_DN		28	-0.668212	-1.9046	0	0.00529642	0.26	2585	tags=54%, list=13%, signal=61%
LI_WILMS_TUMOR_VS_FETAL_KIDNEY_1_DN	LI_WILMS_TUMOR_VS_FETAL_KIDNEY_1_DN		161	-0.494122	-1.89744	0	0.00589347	0.29	4289	tags=46%, list=21%, signal=58%
ZHANG_TLX_TARGETS_UP	ZHANG_TLX_TARGETS_UP		88	-0.538936	-1.88029	0	0.00733905	0.38	5990	tags=69%, list=29%, signal=98%
REACTOME_DNA_STRAND_ELONGATION	REACTOME_DNA_STRAND_ELONGATION		30	-0.644136	-1.87513	0	0.00773597	0.41	5369	tags=73%, list=26%, signal=99%
REACTOME_INFLUENZA_VIRAL_RNA_TRANSCRIPTION_AND_REPLICATION	REACTOME_INFLUENZA_VIRAL_RNA_TRANSCRIPTION_AND_REPLICATION		102	-0.538612	-1.87444	0	0.00794113	0.42	7055	tags=68%, list=35%, signal=103%
GRAHAM_CML_DIVIDING_VS_NORMAL_QUIESCENT_UP	GRAHAM_CML_DIVIDING_VS_NORMAL_QUIESCENT_UP		170	-0.481795	-1.87111	0	0.00846427	0.44	4343	tags=49%, list=21%, signal=62%
GOBERT_OLIGODENDROCYTE_DIFFERENTIATION_UP	GOBERT_OLIGODENDROCYTE_DIFFERENTIATION_UP		549	-0.43338	-1.86834	0	0.00913676	0.47	4547	tags=45%, list=22%, signal=57%
KAUFFMANN_MELANOMA_RELAPSE_UP	KAUFFMANN_MELANOMA_RELAPSE_UP		60	-0.613643	-1.85611	0	0.0107315	0.55	5504	tags=67%, list=27%, signal=91%
FERREIRA_EWINGS_SARCOMA_UNSTABLE_VS_STABLE_UP	FERREIRA_EWINGS_SARCOMA_UNSTABLE_VS_STABLE_UP		155	-0.496416	-1.85279	0	0.0107271	0.56	4430	tags=43%, list=22%, signal=54%
GRAHAM_NORMAL_QUIESCENT_VS_NORMAL_DIVIDING_DN	GRAHAM_NORMAL_QUIESCENT_VS_NORMAL_DIVIDING_DN		83	-0.546827	-1.84437	0	0.0128713	0.62	4343	tags=58%, list=21%, signal=73%
REACTOME_3_UTR_MEDIATED_TRANSLATIONAL_REGULATION	REACTOME_3_UTR_MEDIATED_TRANSLATIONAL_REGULATION		106	-0.514805	-1.84409	0	0.0126847	0.62	7057	tags=65%, list=35%, signal=99%
BLUM_RESPONSE_TO_SALIRASIB_DN	BLUM_RESPONSE_TO_SALIRASIB_DN		338	-0.438519	-1.82855	0	0.0157825	0.69	5157	tags=48%, list=25%, signal=63%
REACTOME_ACTIVATION_OF_THE_PRE_REPLICATIVE_COMPLEX	REACTOME_ACTIVATION_OF_THE_PRE_REPLICATIVE_COMPLEX		30	-0.619774	-1.81933	0	0.0177712	0.71	5369	tags=63%, list=26%, signal=86%
REACTOME_INFLUENZA_LIFE_CYCLE	REACTOME_INFLUENZA_LIFE_CYCLE		136	-0.486567	-1.81515	0	0.0181107	0.72	7758	tags=68%, list=38%, signal=109%
CHIANG_LIVER_CANCER_SUBCLASS_PROLIFERATION_UP	CHIANG_LIVER_CANCER_SUBCLASS_PROLIFERATION_UP		169	-0.479649	-1.81029	0	0.0192779	0.76	3001	tags=46%, list=15%, signal=54%
SCIAN_CELL_CYCLE_TARGETS_OF_TP53_AND_TP73_DN	SCIAN_CELL_CYCLE_TARGETS_OF_TP53_AND_TP73_DN		22	-0.744365	-1.8042	0	0.0204287	0.78	3991	tags=82%, list=20%, signal=102%
LE_NEURONAL_DIFFERENTIATION_DN	LE_NEURONAL_DIFFERENTIATION_DN		19	-0.747756	-1.80273	0	0.0209825	0.78	2842	tags=68%, list=14%, signal=79%
ZHAN_MULTIPLE_MYELOMA_PR_UP	ZHAN_MULTIPLE_MYELOMA_PR_UP		44	-0.580258	-1.80212	0	0.0208409	0.79	3339	tags=59%, list=16%, signal=71%
MITSIADES_RESPONSE_TO_APLIDIN_DN	MITSIADES_RESPONSE_TO_APLIDIN_DN		244	-0.426069	-1.80187	0	0.0208398	0.79	4676	tags=39%, list=23%, signal=50%
SHEPARD_CRUSH_AND_BURN_MUTANT_DN	SHEPARD_CRUSH_AND_BURN_MUTANT_DN		167	-0.485015	-1.79794	0	0.0214976	0.8	4039	tags=49%, list=20%, signal=61%
MODY_HIPPOCAMPUS_PRENATAL	MODY_HIPPOCAMPUS_PRENATAL		42	-0.580179	-1.79742	0	0.0213597	0.8	6125	tags=62%, list=30%, signal=88%
PID_ERB_GENOMIC_PATHWAY	PID_ERB_GENOMIC_PATHWAY		15	-0.66516	-1.79406	0.0243902	0.0221597	0.82	5494	tags=73%, list=27%, signal=100%
WINNEPENNINCKX_MELANOMA_METASTASIS_UP	WINNEPENNINCKX_MELANOMA_METASTASIS_UP		155	-0.474283	-1.79124	0	0.0227755	0.83	5059	tags=48%, list=25%, signal=63%
REACTOME_EXTENSION_OF_TELOMERES	REACTOME_EXTENSION_OF_TELOMERES		27	-0.63937	-1.78946	0	0.0232544	0.85	5115	tags=67%, list=25%, signal=89%
DELPUECH_FOXO3_TARGETS_DN	DELPUECH_FOXO3_TARGETS_DN		40	-0.57347	-1.7778	0	0.0271037	0.89	4373	tags=58%, list=21%, signal=73%
REACTOME_CELL_CYCLE_MITOTIC	REACTOME_CELL_CYCLE_MITOTIC		302	-0.423895	-1.77677	0	0.0270315	0.91	6046	tags=47%, list=30%, signal=66%
WHITFIELD_CELL_CYCLE_G2	WHITFIELD_CELL_CYCLE_G2		172	-0.471949	-1.77473	0	0.0275726	0.91	3579	tags=42%, list=18%, signal=51%
REACTOME_G2_M_CHECKPOINTS	REACTOME_G2_M_CHECKPOINTS		41	-0.57691	-1.76994	0	0.0293338	0.93	5538	tags=61%, list=27%, signal=84%
WHITFIELD_CELL_CYCLE_G2_M	WHITFIELD_CELL_CYCLE_G2_M		201	-0.430627	-1.76281	0	0.0317684	0.95	3579	tags=39%, list=18%, signal=47%
CONRAD_STEM_CELL	CONRAD_STEM_CELL		36	-0.550976	-1.7589	0	0.0326953	0.95	2951	tags=25%, list=15%, signal=29%
YU_MYC_TARGETS_UP	YU_MYC_TARGETS_UP		40	-0.623602	-1.75878	0	0.0323279	0.95	2991	tags=45%, list=15%, signal=53%
FINETTI_BREAST_CANCER_KINOME_RED	FINETTI_BREAST_CANCER_KINOME_RED		16	-0.728907	-1.75617	0	0.0328903	0.95	5048	tags=88%, list=25%, signal=116%
REACTOME_DNA_REPAIR	REACTOME_DNA_REPAIR		105	-0.487911	-1.74974	0	0.035396	0.95	5763	tags=50%, list=28%, signal=70%
FUJII_YBX1_TARGETS_DN	FUJII_YBX1_TARGETS_DN		195	-0.438785	-1.74842	0	0.0352386	0.96	4420	tags=44%, list=22%, signal=55%
TANG_SENESCENCE_TP53_TARGETS_DN	TANG_SENESCENCE_TP53_TARGETS_DN		56	-0.553667	-1.74659	0	0.0355361	0.96	2945	tags=57%, list=14%, signal=67%
REACTOME_ACTIVATION_OF_ATR_IN_RESPONSE_TO_REPLICATION_STRESS	REACTOME_ACTIVATION_OF_ATR_IN_RESPONSE_TO_REPLICATION_STRESS		35	-0.583959	-1.74107	0	0.0372667	0.96	5538	tags=63%, list=27%, signal=86%
PID_LYMPHANGIOGENESIS_PATHWAY	PID_LYMPHANGIOGENESIS_PATHWAY		25	-0.602935	-1.74002	0	0.0375332	0.97	1381	tags=12%, list=7%, signal=13%
GARGALOVIC_RESPONSE_TO_OXIDIZED_PHOSPHOLIPIDS_GREEN_DN	GARGALOVIC_RESPONSE_TO_OXIDIZED_PHOSPHOLIPIDS_GREEN_DN		21	-0.658918	-1.73957	0.0243902	0.0374674	0.97	5358	tags=57%, list=26%, signal=77%
REACTOME_DEADENYLATION_DEPENDENT_MRNA_DECAY	REACTOME_DEADENYLATION_DEPENDENT_MRNA_DECAY		43	-0.519257	-1.73766	0.0277778	0.0376186	0.97	7153	tags=65%, list=35%, signal=100%
REACTOME_MRNA_SPLICING	REACTOME_MRNA_SPLICING		105	-0.499549	-1.73716	0	0.0375526	0.97	6472	tags=55%, list=32%, signal=81%
KEGG_MISMATCH_REPAIR	KEGG_MISMATCH_REPAIR		23	-0.613287	-1.72866	0.0285714	0.0408574	0.98	5807	tags=65%, list=29%, signal=91%
KEGG_DNA_REPLICATION	KEGG_DNA_REPLICATION		36	-0.581073	-1.72361	0	0.0419108	0.98	5807	tags=64%, list=29%, signal=89%
ZEMBUTSU_SENSITIVITY_TO_METHOTREXATE	ZEMBUTSU_SENSITIVITY_TO_METHOTREXATE		15	-0.661465	-1.72154	0.0227273	0.0423318	0.98	1313	tags=27%, list=6%, signal=28%
SMID_BREAST_CANCER_LUMINAL_A_DN	SMID_BREAST_CANCER_LUMINAL_A_DN		18	-0.669965	-1.72127	0	0.0420191	0.98	1818	tags=50%, list=9%, signal=55%
REACTOME_PROCESSING_OF_CAPPED_INTRON_CONTAINING_PRE_MRNA	REACTOME_PROCESSING_OF_CAPPED_INTRON_CONTAINING_PRE_MRNA		134	-0.477692	-1.72053	0	0.0418121	0.98	6610	tags=52%, list=32%, signal=77%
Top 100 gene sets enriched in ARsig-hi compared to ARsig-lo
NAME	GS<br> follow link to MSigDB	GS DETAILS	SIZE	ES	NES	NOM p-val	FDR q-val	FWER p-val	RANK AT MAX	LEADING EDGE
NELSON_RESPONSE_TO_ANDROGEN_UP	NELSON_RESPONSE_TO_ANDROGEN_UP	Details ...	86	0.709608	2.25346	0	0	0	3339	tags=53%, list=16%, signal=64%
BROWNE_INTERFERON_RESPONSIVE_GENES	BROWNE_INTERFERON_RESPONSIVE_GENES	Details ...	67	0.75614	2.25146	0	0	0	2158	tags=43%, list=11%, signal=48%
MOSERLE_IFNA_RESPONSE	MOSERLE_IFNA_RESPONSE	Details ...	31	0.82236	2.23686	0	0	0	2481	tags=74%, list=12%, signal=84%
SANA_RESPONSE_TO_IFNG_UP	SANA_RESPONSE_TO_IFNG_UP	Details ...	72	0.72651	2.18136	0	0	0	2481	tags=47%, list=12%, signal=54%
RADAEVA_RESPONSE_TO_IFNA1_UP	RADAEVA_RESPONSE_TO_IFNA1_UP	Details ...	51	0.700556	2.1292	0	0	0	1353	tags=35%, list=7%, signal=38%
REACTOME_INTERFERON_GAMMA_SIGNALING	REACTOME_INTERFERON_GAMMA_SIGNALING	Details ...	56	0.705247	2.10545	0	0	0	2862	tags=39%, list=14%, signal=46%
BENNETT_SYSTEMIC_LUPUS_ERYTHEMATOSUS	BENNETT_SYSTEMIC_LUPUS_ERYTHEMATOSUS	Details ...	27	0.758471	2.09936	0	0	0	2481	tags=56%, list=12%, signal=63%
FARMER_BREAST_CANCER_CLUSTER_1	FARMER_BREAST_CANCER_CLUSTER_1	Details ...	34	0.761447	2.09684	0	0	0	2685	tags=53%, list=13%, signal=61%
REACTOME_NITRIC_OXIDE_STIMULATES_GUANYLATE_CYCLASE	REACTOME_NITRIC_OXIDE_STIMULATES_GUANYLATE_CYCLASE	Details ...	25	0.791088	2.08173	0	0	0	2621	tags=56%, list=13%, signal=64%
TAKEDA_TARGETS_OF_NUP98_HOXA9_FUSION_3D_UP	TAKEDA_TARGETS_OF_NUP98_HOXA9_FUSION_3D_UP	Details ...	161	0.604648	2.01584	0	0	0	2531	tags=39%, list=12%, signal=44%
SANA_TNF_SIGNALING_UP	SANA_TNF_SIGNALING_UP	Details ...	76	0.646764	2.01256	0	0	0	2029	tags=30%, list=10%, signal=33%
DER_IFN_ALPHA_RESPONSE_UP	DER_IFN_ALPHA_RESPONSE_UP	Details ...	72	0.620029	2.00646	0	0	0	2158	tags=29%, list=11%, signal=33%
REACTOME_INTERFERON_SIGNALING	REACTOME_INTERFERON_SIGNALING	Details ...	137	0.591057	2.005	0	0	0	2985	tags=28%, list=15%, signal=32%
RICKMAN_HEAD_AND_NECK_CANCER_C	RICKMAN_HEAD_AND_NECK_CANCER_C	Details ...	87	0.64695	2.00437	0	0	0	2328	tags=37%, list=11%, signal=41%
WIELAND_UP_BY_HBV_INFECTION	WIELAND_UP_BY_HBV_INFECTION	Details ...	92	0.633224	1.99899	0	0	0	2239	tags=32%, list=11%, signal=35%
KRASNOSELSKAYA_ILF3_TARGETS_UP	KRASNOSELSKAYA_ILF3_TARGETS_UP	Details ...	38	0.718235	1.9873	0	0	0	2158	tags=53%, list=11%, signal=59%
LINDSTEDT_DENDRITIC_CELL_MATURATION_A	LINDSTEDT_DENDRITIC_CELL_MATURATION_A	Details ...	58	0.658872	1.98139	0	0	0	1745	tags=28%, list=9%, signal=30%
UROSEVIC_RESPONSE_TO_IMIQUIMOD	UROSEVIC_RESPONSE_TO_IMIQUIMOD	Details ...	22	0.788476	1.97451	0	0.000545502	0.01	1735	tags=50%, list=9%, signal=55%
SEKI_INFLAMMATORY_RESPONSE_LPS_UP	SEKI_INFLAMMATORY_RESPONSE_LPS_UP	Details ...	71	0.633715	1.95013	0	0.00101762	0.02	3804	tags=45%, list=19%, signal=55%
REACTOME_INTERFERON_ALPHA_BETA_SIGNALING	REACTOME_INTERFERON_ALPHA_BETA_SIGNALING	Details ...	48	0.661932	1.94853	0	0.00145558	0.03	2285	tags=33%, list=11%, signal=37%
PLASARI_TGFB1_SIGNALING_VIA_NFIC_10HR_DN	PLASARI_TGFB1_SIGNALING_VIA_NFIC_10HR_DN		29	0.719169	1.94776	0	0.00138627	0.03	1948	tags=34%, list=10%, signal=38%
KERLEY_RESPONSE_TO_CISPLATIN_UP	KERLEY_RESPONSE_TO_CISPLATIN_UP		42	0.705033	1.94695	0	0.00132325	0.03	4276	tags=69%, list=21%, signal=87%
CROMER_TUMORIGENESIS_UP	CROMER_TUMORIGENESIS_UP		56	0.656623	1.94414	0	0.00126572	0.03	1548	tags=27%, list=8%, signal=29%
REACTOME_BILE_ACID_AND_BILE_SALT_METABOLISM	REACTOME_BILE_ACID_AND_BILE_SALT_METABOLISM		23	0.723123	1.94178	0	0.00162716	0.04	2940	tags=52%, list=14%, signal=61%
SEITZ_NEOPLASTIC_TRANSFORMATION_BY_8P_DELETION_UP	SEITZ_NEOPLASTIC_TRANSFORMATION_BY_8P_DELETION_UP		70	0.6378	1.93743	0	0.00195561	0.05	2031	tags=47%, list=10%, signal=52%
ICHIBA_GRAFT_VERSUS_HOST_DISEASE_D7_UP	ICHIBA_GRAFT_VERSUS_HOST_DISEASE_D7_UP		95	0.604216	1.93585	0	0.00188039	0.05	2985	tags=39%, list=15%, signal=45%
REACTOME_RESPONSE_TO_ELEVATED_PLATELET_CYTOSOLIC_CA2_	REACTOME_RESPONSE_TO_ELEVATED_PLATELET_CYTOSOLIC_CA2_		78	0.617103	1.93324	0	0.00181075	0.05	2460	tags=33%, list=12%, signal=38%
GHANDHI_DIRECT_IRRADIATION_UP	GHANDHI_DIRECT_IRRADIATION_UP		95	0.594153	1.92411	0	0.00244432	0.07	3867	tags=47%, list=19%, signal=58%
YAMASHITA_LIVER_CANCER_STEM_CELL_DN	YAMASHITA_LIVER_CANCER_STEM_CELL_DN		64	0.627392	1.91765	0	0.00337662	0.1	2295	tags=33%, list=11%, signal=37%
HECKER_IFNB1_TARGETS	HECKER_IFNB1_TARGETS		79	0.63101	1.91129	0	0.00391004	0.12	2383	tags=46%, list=12%, signal=51%
DER_IFN_BETA_RESPONSE_UP	DER_IFN_BETA_RESPONSE_UP		100	0.600865	1.9076	0	0.00472563	0.15	2158	tags=26%, list=11%, signal=29%
KIM_LRRC3B_TARGETS	KIM_LRRC3B_TARGETS		30	0.7381	1.8972	0	0.00549661	0.16	2158	tags=40%, list=11%, signal=45%
HSIAO_LIVER_SPECIFIC_GENES	HSIAO_LIVER_SPECIFIC_GENES		217	0.533226	1.88342	0	0.00740935	0.23	2951	tags=30%, list=15%, signal=35%
BOWIE_RESPONSE_TO_TAMOXIFEN	BOWIE_RESPONSE_TO_TAMOXIFEN		18	0.782771	1.87561	0	0.00834973	0.26	1763	tags=61%, list=9%, signal=67%
GROSS_ELK3_TARGETS_DN	GROSS_ELK3_TARGETS_DN		30	0.702425	1.87513	0	0.00811116	0.26	2954	tags=40%, list=15%, signal=47%
ALTEMEIER_RESPONSE_TO_LPS_WITH_MECHANICAL_VENTILATION	ALTEMEIER_RESPONSE_TO_LPS_WITH_MECHANICAL_VENTILATION		114	0.579873	1.8633	0	0.00869894	0.28	2705	tags=34%, list=13%, signal=39%
SCHUETZ_BREAST_CANCER_DUCTAL_INVASIVE_UP	SCHUETZ_BREAST_CANCER_DUCTAL_INVASIVE_UP		313	0.517756	1.85738	0	0.00899035	0.28	2949	tags=31%, list=14%, signal=36%
CHIANG_LIVER_CANCER_SUBCLASS_PROLIFERATION_DN	CHIANG_LIVER_CANCER_SUBCLASS_PROLIFERATION_DN		155	0.545617	1.84924	0	0.010812	0.33	3533	tags=32%, list=17%, signal=39%
REACTOME_FORMATION_OF_FIBRIN_CLOT_CLOTTING_CASCADE	REACTOME_FORMATION_OF_FIBRIN_CLOT_CLOTTING_CASCADE		28	0.694154	1.8491	0	0.0107854	0.34	3045	tags=54%, list=15%, signal=63%
RICKMAN_HEAD_AND_NECK_CANCER_E	RICKMAN_HEAD_AND_NECK_CANCER_E		70	0.579752	1.84779	0	0.0105158	0.34	2659	tags=31%, list=13%, signal=36%
GAJATE_RESPONSE_TO_TRABECTEDIN_UP	GAJATE_RESPONSE_TO_TRABECTEDIN_UP		63	0.601858	1.84444	0	0.0116965	0.39	2612	tags=35%, list=13%, signal=40%
GRANDVAUX_IRF3_TARGETS_UP	GRANDVAUX_IRF3_TARGETS_UP		15	0.83891	1.83777	0	0.0128155	0.43	908	tags=53%, list=4%, signal=56%
MAHADEVAN_RESPONSE_TO_MP470_UP	MAHADEVAN_RESPONSE_TO_MP470_UP		17	0.823494	1.8341	0	0.0132029	0.46	1745	tags=47%, list=9%, signal=51%
GOZGIT_ESR1_TARGETS_DN	GOZGIT_ESR1_TARGETS_DN		691	0.480649	1.83218	0	0.0131246	0.47	3832	tags=35%, list=19%, signal=42%
WINTER_HYPOXIA_DN	WINTER_HYPOXIA_DN		43	0.645112	1.8297	0	0.0141347	0.49	2888	tags=35%, list=14%, signal=41%
LINDSTEDT_DENDRITIC_CELL_MATURATION_D	LINDSTEDT_DENDRITIC_CELL_MATURATION_D		63	0.609363	1.82924	0	0.0140371	0.49	3099	tags=37%, list=15%, signal=43%
LIANG_SILENCED_BY_METHYLATION_2	LIANG_SILENCED_BY_METHYLATION_2		48	0.667421	1.82643	0	0.0141529	0.51	3045	tags=54%, list=15%, signal=64%
BIOCARTA_INTRINSIC_PATHWAY	BIOCARTA_INTRINSIC_PATHWAY		22	0.751577	1.82581	0	0.0138581	0.51	1991	tags=59%, list=10%, signal=65%
NAKAYAMA_SOFT_TISSUE_TUMORS_PCA1_UP	NAKAYAMA_SOFT_TISSUE_TUMORS_PCA1_UP		61	0.633896	1.81599	0	0.0175613	0.61	2054	tags=34%, list=10%, signal=38%
REACTOME_CGMP_EFFECTS	REACTOME_CGMP_EFFECTS		19	0.771991	1.80948	0	0.018186	0.63	2621	tags=53%, list=13%, signal=60%
AMIT_SERUM_RESPONSE_60_MCF10A	AMIT_SERUM_RESPONSE_60_MCF10A		53	0.59291	1.80938	0	0.0178295	0.63	4570	tags=47%, list=22%, signal=61%
REACTOME_PHASE1_FUNCTIONALIZATION_OF_COMPOUNDS	REACTOME_PHASE1_FUNCTIONALIZATION_OF_COMPOUNDS		60	0.599006	1.80749	0	0.017864	0.64	3231	tags=35%, list=16%, signal=41%
LE_SKI_TARGETS_UP	LE_SKI_TARGETS_UP		15	0.854721	1.80522	0	0.0178979	0.64	1336	tags=60%, list=7%, signal=64%
MASRI_RESISTANCE_TO_TAMOXIFEN_AND_AROMATASE_INHIBITORS_DN	MASRI_RESISTANCE_TO_TAMOXIFEN_AND_AROMATASE_INHIBITORS_DN		16	0.78617	1.80186	0	0.0191966	0.7	1852	tags=44%, list=9%, signal=48%
KHETCHOUMIAN_TRIM24_TARGETS_UP	KHETCHOUMIAN_TRIM24_TARGETS_UP		47	0.624672	1.80066	0	0.0197294	0.72	2705	tags=47%, list=13%, signal=54%
WANG_RESPONSE_TO_ANDROGEN_UP	WANG_RESPONSE_TO_ANDROGEN_UP		28	0.70926	1.79516	0	0.0206059	0.76	3518	tags=50%, list=17%, signal=60%
KOHOUTEK_CCNT1_TARGETS	KOHOUTEK_CCNT1_TARGETS		48	0.621392	1.79397	0	0.0207595	0.76	2297	tags=29%, list=11%, signal=33%
FUJII_YBX1_TARGETS_UP	FUJII_YBX1_TARGETS_UP		38	0.689797	1.79172	0	0.0210729	0.77	2764	tags=47%, list=14%, signal=55%
JISON_SICKLE_CELL_DISEASE_UP	JISON_SICKLE_CELL_DISEASE_UP		170	0.5255	1.78775	0	0.023196	0.84	3891	tags=34%, list=19%, signal=42%
MARKEY_RB1_ACUTE_LOF_UP	MARKEY_RB1_ACUTE_LOF_UP		192	0.547496	1.78601	0	0.0231313	0.84	4369	tags=40%, list=21%, signal=51%
NIELSEN_GIST_AND_SYNOVIAL_SARCOMA_DN	NIELSEN_GIST_AND_SYNOVIAL_SARCOMA_DN		18	0.756602	1.78253	0	0.0238784	0.85	1810	tags=39%, list=9%, signal=43%
GILDEA_METASTASIS	GILDEA_METASTASIS		28	0.701027	1.77341	0	0.0274424	0.86	1763	tags=50%, list=9%, signal=55%
RUAN_RESPONSE_TO_TNF_TROGLITAZONE_UP	RUAN_RESPONSE_TO_TNF_TROGLITAZONE_UP		16	0.673045	1.76562	0	0.0305802	0.91	3662	tags=50%, list=18%, signal=61%
EINAV_INTERFERON_SIGNATURE_IN_CANCER	EINAV_INTERFERON_SIGNATURE_IN_CANCER		26	0.731838	1.76473	0	0.0305565	0.93	1353	tags=46%, list=7%, signal=49%
ZHANG_RESPONSE_TO_IKK_INHIBITOR_AND_TNF_UP	ZHANG_RESPONSE_TO_IKK_INHIBITOR_AND_TNF_UP		207	0.512981	1.75794	0	0.0334002	0.94	4387	tags=42%, list=22%, signal=53%
REACTOME_SYNTHESIS_OF_BILE_ACIDS_AND_BILE_SALTS	REACTOME_SYNTHESIS_OF_BILE_ACIDS_AND_BILE_SALTS		16	0.702089	1.75364	0	0.0354114	0.94	2940	tags=50%, list=14%, signal=58%
RIGGINS_TAMOXIFEN_RESISTANCE_DN	RIGGINS_TAMOXIFEN_RESISTANCE_DN		214	0.488204	1.75242	0	0.035615	0.94	3865	tags=32%, list=19%, signal=39%
REACTOME_OLFACTORY_SIGNALING_PATHWAY	REACTOME_OLFACTORY_SIGNALING_PATHWAY		65	0.593429	1.75094	0	0.0361053	0.94	1426	tags=15%, list=7%, signal=16%
CHIANG_LIVER_CANCER_SUBCLASS_INTERFERON_UP	CHIANG_LIVER_CANCER_SUBCLASS_INTERFERON_UP		19	0.756202	1.74449	0	0.038276	0.98	1126	tags=47%, list=6%, signal=50%
GAVIN_PDE3B_TARGETS	GAVIN_PDE3B_TARGETS		19	0.698018	1.74397	0	0.0378686	0.98	2689	tags=42%, list=13%, signal=48%
BROWNE_HCMV_INFECTION_4HR_UP	BROWNE_HCMV_INFECTION_4HR_UP		48	0.616077	1.74365	0	0.0374711	0.98	2214	tags=35%, list=11%, signal=40%
STOSSI_RESPONSE_TO_ESTRADIOL	STOSSI_RESPONSE_TO_ESTRADIOL		46	0.609336	1.74259	0	0.0377658	0.98	3112	tags=37%, list=15%, signal=44%
AMUNDSON_DNA_DAMAGE_RESPONSE_TP53	AMUNDSON_DNA_DAMAGE_RESPONSE_TP53		16	0.749288	1.7416	0	0.0379228	0.98	4622	tags=75%, list=23%, signal=97%
AMIT_EGF_RESPONSE_60_MCF10A	AMIT_EGF_RESPONSE_60_MCF10A		35	0.653302	1.74151	0.0140845	0.0374103	0.98	3815	tags=57%, list=19%, signal=70%
LIAN_LIPA_TARGETS_6M	LIAN_LIPA_TARGETS_6M		53	0.613535	1.73957	0	0.038348	0.99	1682	tags=23%, list=8%, signal=25%
BOYAULT_LIVER_CANCER_SUBCLASS_G5_DN	BOYAULT_LIVER_CANCER_SUBCLASS_G5_DN		26	0.662503	1.73874	0	0.0380995	0.99	3340	tags=46%, list=16%, signal=55%
YAN_ESCAPE_FROM_ANOIKIS	YAN_ESCAPE_FROM_ANOIKIS		24	0.716652	1.73872	0	0.0376047	0.99	2764	tags=42%, list=14%, signal=48%
DOANE_BREAST_CANCER_CLASSES_UP	DOANE_BREAST_CANCER_CLASSES_UP		69	0.590132	1.73755	0	0.0383748	0.99	3710	tags=46%, list=18%, signal=57%
BOSCO_TH1_CYTOTOXIC_MODULE	BOSCO_TH1_CYTOTOXIC_MODULE		82	0.551121	1.72889	0	0.0425969	1	2229	tags=27%, list=11%, signal=30%
DAUER_STAT3_TARGETS_DN	DAUER_STAT3_TARGETS_DN		50	0.647109	1.72857	0	0.0424321	1	2481	tags=46%, list=12%, signal=52%
LABBE_WNT3A_TARGETS_DN	LABBE_WNT3A_TARGETS_DN		86	0.531247	1.72708	0	0.0436106	1	2086	tags=22%, list=10%, signal=25%
ALONSO_METASTASIS_EMT_UP	ALONSO_METASTASIS_EMT_UP		35	0.628725	1.72553	0	0.0443914	1	2791	tags=37%, list=14%, signal=43%
PID_INTEGRIN_A9B1_PATHWAY	PID_INTEGRIN_A9B1_PATHWAY		23	0.684267	1.7251	0	0.0439731	1	1371	tags=22%, list=7%, signal=23%
ZHANG_INTERFERON_RESPONSE	ZHANG_INTERFERON_RESPONSE		22	0.682631	1.72449	0	0.0435668	1	2285	tags=45%, list=11%, signal=51%
ICHIBA_GRAFT_VERSUS_HOST_DISEASE_35D_UP	ICHIBA_GRAFT_VERSUS_HOST_DISEASE_35D_UP		117	0.52685	1.72403	0	0.0436269	1	2689	tags=32%, list=13%, signal=36%
STAMBOLSKY_TARGETS_OF_MUTATED_TP53_DN	STAMBOLSKY_TARGETS_OF_MUTATED_TP53_DN		45	0.609182	1.72263	0	0.04391	1	2829	tags=38%, list=14%, signal=44%
JOSEPH_RESPONSE_TO_SODIUM_BUTYRATE_UP	JOSEPH_RESPONSE_TO_SODIUM_BUTYRATE_UP		30	0.645004	1.72098	0	0.0439641	1	3699	tags=40%, list=18%, signal=49%
TAVOR_CEBPA_TARGETS_UP	TAVOR_CEBPA_TARGETS_UP		44	0.624504	1.71991	0	0.0441294	1	4220	tags=52%, list=21%, signal=66%
KAAB_FAILED_HEART_VENTRICLE_DN	KAAB_FAILED_HEART_VENTRICLE_DN		40	0.612785	1.71803	0	0.0446212	1	3927	tags=40%, list=19%, signal=49%
GAURNIER_PSMD4_TARGETS	GAURNIER_PSMD4_TARGETS		58	0.596416	1.71701	0	0.0447748	1	3029	tags=33%, list=15%, signal=38%
PID_INTEGRIN3_PATHWAY	PID_INTEGRIN3_PATHWAY		42	0.614326	1.71604	0	0.0450391	1	2528	tags=36%, list=12%, signal=41%
COLIN_PILOCYTIC_ASTROCYTOMA_VS_GLIOBLASTOMA_DN	COLIN_PILOCYTIC_ASTROCYTOMA_VS_GLIOBLASTOMA_DN		26	0.639962	1.71547	0.0166667	0.0450786	1	1816	tags=27%, list=9%, signal=30%
HOFFMANN_PRE_BI_TO_LARGE_PRE_BII_LYMPHOCYTE_DN	HOFFMANN_PRE_BI_TO_LARGE_PRE_BII_LYMPHOCYTE_DN		66	0.559452	1.7137	0	0.0454324	1	2547	tags=33%, list=13%, signal=38%
WARTERS_RESPONSE_TO_IR_SKIN	WARTERS_RESPONSE_TO_IR_SKIN		74	0.544633	1.7137	0	0.0449491	1	5406	tags=59%, list=27%, signal=81%
SMIRNOV_RESPONSE_TO_IR_2HR_UP	SMIRNOV_RESPONSE_TO_IR_2HR_UP		50	0.591611	1.7091	0	0.0470482	1	4554	tags=52%, list=22%, signal=67%
KIM_RESPONSE_TO_TSA_AND_DECITABINE_UP	KIM_RESPONSE_TO_TSA_AND_DECITABINE_UP		115	0.514736	1.70786	0	0.0471708	1	3688	tags=40%, list=18%, signal=49%
TURASHVILI_BREAST_LOBULAR_CARCINOMA_VS_LOBULAR_NORMAL_UP	TURASHVILI_BREAST_LOBULAR_CARCINOMA_VS_LOBULAR_NORMAL_UP		89	0.530764	1.70732	0	0.0471875	1	2643	tags=30%, list=13%, signal=35%
VECCHI_GASTRIC_CANCER_EARLY_DN	VECCHI_GASTRIC_CANCER_EARLY_DN		307	0.472876	1.70721	0	0.046706	1	2646	tags=28%, list=13%, signal=32%
AZARE_NEOPLASTIC_TRANSFORMATION_BY_STAT3_UP	AZARE_NEOPLASTIC_TRANSFORMATION_BY_STAT3_UP		115	0.518715	1.70677	0	0.0463342	1	2141	tags=24%, list=11%, signal=27%
LEI_HOXC8_TARGETS_DN	LEI_HOXC8_TARGETS_DN		16	0.681652	1.69892	0.0192308	0.052226	1	493	tags=25%, list=2%, signal=26%
