# Supplementary material for: GREB1 amplifies androgen receptor output in human prostate cancer and contributes to antiandrogen resistance
Source: eLife. 2019 Jan 15;8:e41913. doi: 10.7554/eLife.41913 (PMC6336405; doi:10.7554/eLife.41913)
Supplement: Figure 2—source data 1. [file elife-41913-fig2-data1.xlsx]

## Sheet: 2
Figure2-source data 1 : Differentially expressed genes between ARsig-lo vs. ARsig-hi (Fold change ≥ 1.5, p < 0.05)
Column ID	p-value(ARsig-hi vs. ARsig-lo)	MeanRatio(ARsig-hi vs. ARsig-lo)	FoldChange(ARsig-hi vs. ARsig-lo)	FoldChange(ARsig-hi vs. ARsig-lo) (Description)
CLEC18C	0.0335743	20080	20080	AR-High up vs AR-Low
TRIM49D1	0.00740047	18.194	18.194	AR-High up vs AR-Low
CXCL11	0.0137144	12.5758	12.5758	AR-High up vs AR-Low
FAM181B	0.0493984	10.3466	10.3466	AR-High up vs AR-Low
NT5E	0.0112554	10.3466	10.3466	AR-High up vs AR-Low
SRSF12	0.0239946	8.26539	8.26539	AR-High up vs AR-Low
SAMD9L	0.00421471	7.68888	7.68888	AR-High up vs AR-Low
KCNT2	0.00975011	7.35899	7.35899	AR-High up vs AR-Low
PKD2L2	0.0363132	6.87436	6.87436	AR-High up vs AR-Low
GHRHR	0.0324082	6.76036	6.76036	AR-High up vs AR-Low
KLHL41	0.0287978	6.74916	6.74916	AR-High up vs AR-Low
LOC101928767	0.00422406	6.42867	6.42867	AR-High up vs AR-Low
TGM5	0.0111609	6.35002	6.35002	AR-High up vs AR-Low
HECW1	0.0114915	5.63018	5.63018	AR-High up vs AR-Low
KRT75	0.0271799	5.38529	5.38529	AR-High up vs AR-Low
OR6B3	0.0445249	5.23292	5.23292	AR-High up vs AR-Low
FOXB1	0.0316796	5.17332	5.17332	AR-High up vs AR-Low
PROCA1	0.0316796	5.17332	5.17332	AR-High up vs AR-Low
SLC6A17	0.0333866	5.17332	5.17332	AR-High up vs AR-Low
PDE3A	0.00799544	5.16237	5.16237	AR-High up vs AR-Low
PNLIP	0.0432619	5.13952	5.13952	AR-High up vs AR-Low
COL28A1	0.0318798	4.906	4.906	AR-High up vs AR-Low
HSD17B13	0.0165283	4.906	4.906	AR-High up vs AR-Low
CAMK1G	0.0392958	4.69771	4.69771	AR-High up vs AR-Low
VCAM1	0.0395323	4.66494	4.66494	AR-High up vs AR-Low
RYR3	0.0366188	4.64768	4.64768	AR-High up vs AR-Low
GP6	0.0266679	4.4267	4.4267	AR-High up vs AR-Low
GBP1	0.0242303	4.35205	4.35205	AR-High up vs AR-Low
LHX9	0.00328453	4.34172	4.34172	AR-High up vs AR-Low
OAS2	0.0214591	4.31261	4.31261	AR-High up vs AR-Low
TMEM150C	0.0292383	4.18542	4.18542	AR-High up vs AR-Low
GIMAP4	0.0310233	4.1625	4.1625	AR-High up vs AR-Low
LINC01482	0.0310233	4.1625	4.1625	AR-High up vs AR-Low
LOC101929983	0.0330626	4.09999	4.09999	AR-High up vs AR-Low
FAM83C-AS1	0.00262258	3.94741	3.94741	AR-High up vs AR-Low
UBE2QL1	0.00403155	3.94741	3.94741	AR-High up vs AR-Low
DLX2-AS1	0.0439621	3.75345	3.75345	AR-High up vs AR-Low
SASH3	0.0439621	3.75345	3.75345	AR-High up vs AR-Low
ADRA2A	0.0024506	3.61217	3.61217	AR-High up vs AR-Low
TARP	0.000653755	3.61028	3.61028	AR-High up vs AR-Low
CCDC13	0.0123522	3.6006	3.6006	AR-High up vs AR-Low
LINC00595	0.0168856	3.53108	3.53108	AR-High up vs AR-Low
EPS8L1	0.038245	3.5277	3.5277	AR-High up vs AR-Low
STEAP4	0.0372795	3.45979	3.45979	AR-High up vs AR-Low
CDHR3	0.00109634	3.32733	3.32733	AR-High up vs AR-Low
TRIM22	0.00608642	3.31771	3.31771	AR-High up vs AR-Low
BISPR	0.0151282	3.31182	3.31182	AR-High up vs AR-Low
LOC101927282	0.0437063	3.23381	3.23381	AR-High up vs AR-Low
NOX1	0.0408906	3.21322	3.21322	AR-High up vs AR-Low
LINC00920	0.00776446	3.14662	3.14662	AR-High up vs AR-Low
HEPH	0.00348972	3.094	3.094	AR-High up vs AR-Low
LOC100507420	0.0091403	3.06207	3.06207	AR-High up vs AR-Low
LINC00693	0.0315837	3.06111	3.06111	AR-High up vs AR-Low
STMN4	0.000992267	3.05643	3.05643	AR-High up vs AR-Low
TRIM43	0.00855042	2.99146	2.99146	AR-High up vs AR-Low
NBPF7	0.000181595	2.9599	2.9599	AR-High up vs AR-Low
KLF8	0.0204856	2.90909	2.90909	AR-High up vs AR-Low
KNG1	0.00676452	2.90621	2.90621	AR-High up vs AR-Low
CADM2	0.0102958	2.88297	2.88297	AR-High up vs AR-Low
LOC101928505	0.0111842	2.85887	2.85887	AR-High up vs AR-Low
CCDC141	0.0374816	2.85555	2.85555	AR-High up vs AR-Low
MUCL1	0.00958535	2.84988	2.84988	AR-High up vs AR-Low
SCN3A	0.0260488	2.80196	2.80196	AR-High up vs AR-Low
MAGEA1	0.0193838	2.79879	2.79879	AR-High up vs AR-Low
TXNIP	0.038025	2.74926	2.74926	AR-High up vs AR-Low
LINC01237	0.00809974	2.72091	2.72091	AR-High up vs AR-Low
GGT6	0.00156365	2.70678	2.70678	AR-High up vs AR-Low
HSD17B2	0.0195763	2.67773	2.67773	AR-High up vs AR-Low
SP9	0.0226672	2.67773	2.67773	AR-High up vs AR-Low
RSAD2	0.0125855	2.67443	2.67443	AR-High up vs AR-Low
ANGPT2	0.0476732	2.64894	2.64894	AR-High up vs AR-Low
ID4	0.0153927	2.5869	2.5869	AR-High up vs AR-Low
VCX2	0.00654183	2.56595	2.56595	AR-High up vs AR-Low
MMP13	0.00744752	2.54312	2.54312	AR-High up vs AR-Low
DLG2	0.005282	2.53399	2.53399	AR-High up vs AR-Low
LOC100506314	0.00691756	2.53397	2.53397	AR-High up vs AR-Low
NAA11	0.0284352	2.52546	2.52546	AR-High up vs AR-Low
CCR10	0.0461436	2.50558	2.50558	AR-High up vs AR-Low
C10orf32-ASMT	0.0155847	2.48957	2.48957	AR-High up vs AR-Low
COL12A1	0.0196943	2.47878	2.47878	AR-High up vs AR-Low
GHRL	0.0452994	2.4742	2.4742	AR-High up vs AR-Low
SOX6	0.0256716	2.4104	2.4104	AR-High up vs AR-Low
AGR2	0.00891705	2.39596	2.39596	AR-High up vs AR-Low
AOX1	0.0189502	2.37608	2.37608	AR-High up vs AR-Low
CD163L1	0.0012382	2.37071	2.37071	AR-High up vs AR-Low
KLK3	0.00205484	2.32892	2.32892	AR-High up vs AR-Low
AQP7P1	0.0447293	2.32355	2.32355	AR-High up vs AR-Low
HLA-DPA1	0.00087522	2.32042	2.32042	AR-High up vs AR-Low
HPGD	0.0489925	2.31929	2.31929	AR-High up vs AR-Low
RBP4	0.0467272	2.29603	2.29603	AR-High up vs AR-Low
GBP2	0.0114796	2.27443	2.27443	AR-High up vs AR-Low
LINC01260	0.00946098	2.2643	2.2643	AR-High up vs AR-Low
INPP4B	0.0236261	2.23246	2.23246	AR-High up vs AR-Low
AKR1D1	0.0226736	2.21203	2.21203	AR-High up vs AR-Low
MYBPC1	0.0074399	2.19202	2.19202	AR-High up vs AR-Low
CRYAB	0.0400384	2.18114	2.18114	AR-High up vs AR-Low
EYS	0.0409235	2.17086	2.17086	AR-High up vs AR-Low
ACOX2	0.00384485	2.15851	2.15851	AR-High up vs AR-Low
IYD	0.0119038	2.11218	2.11218	AR-High up vs AR-Low
TMEM45B	0.0375515	2.11165	2.11165	AR-High up vs AR-Low
CD37	0.0468375	2.11042	2.11042	AR-High up vs AR-Low
PLCB2	0.0194594	2.08958	2.08958	AR-High up vs AR-Low
LOC400927-CSNK1E	0.00176105	2.07756	2.07756	AR-High up vs AR-Low
POF1B	0.0222573	2.05762	2.05762	AR-High up vs AR-Low
MPPED2	0.000848497	2.05359	2.05359	AR-High up vs AR-Low
ZNF486	0.046717	2.05353	2.05353	AR-High up vs AR-Low
KRT19	0.0230005	2.0501	2.0501	AR-High up vs AR-Low
DPP4	0.00917816	2.04504	2.04504	AR-High up vs AR-Low
BPIFB1	0.00135925	2.02696	2.02696	AR-High up vs AR-Low
LOC104798195	0.0419134	2.0083	2.0083	AR-High up vs AR-Low
ALDH1L1	0.0277651	2.00375	2.00375	AR-High up vs AR-Low
GGT1	0.0165084	2.00367	2.00367	AR-High up vs AR-Low
ACSL3	0.00839144	2.00058	2.00058	AR-High up vs AR-Low
OASL	0.0323168	1.99531	1.99531	AR-High up vs AR-Low
ACTA2	0.0152262	1.98704	1.98704	AR-High up vs AR-Low
TBC1D3P1-DHX40P1	0.0354741	1.9759	1.9759	AR-High up vs AR-Low
LDLRAD4	0.0111461	1.9737	1.9737	AR-High up vs AR-Low
LINC00278	0.000575538	1.9737	1.9737	AR-High up vs AR-Low
LOC730102	0.000575539	1.9737	1.9737	AR-High up vs AR-Low
MTRNR2L3	0.000575538	1.9737	1.9737	AR-High up vs AR-Low
SLC16A4	0.03339	1.96192	1.96192	AR-High up vs AR-Low
PARVA	0.0245606	1.92554	1.92554	AR-High up vs AR-Low
PLCXD3	0.0465416	1.91353	1.91353	AR-High up vs AR-Low
ASTN1	0.00236494	1.90409	1.90409	AR-High up vs AR-Low
OSBPL10	0.0490392	1.88101	1.88101	AR-High up vs AR-Low
LINC00152	0.00319286	1.87708	1.87708	AR-High up vs AR-Low
SPARC	0.00255367	1.86068	1.86068	AR-High up vs AR-Low
EPDR1	0.0324858	1.85418	1.85418	AR-High up vs AR-Low
SPDYE8P	0.0330471	1.8462	1.8462	AR-High up vs AR-Low
PDE11A	0.00222998	1.84414	1.84414	AR-High up vs AR-Low
FAM105A	0.00079254	1.84272	1.84272	AR-High up vs AR-Low
IFIT2	0.00345283	1.8367	1.8367	AR-High up vs AR-Low
MGAT5B	0.00950637	1.82495	1.82495	AR-High up vs AR-Low
ELL2	0.00909353	1.82149	1.82149	AR-High up vs AR-Low
ELOVL7	0.00321543	1.82094	1.82094	AR-High up vs AR-Low
DOCK3	0.00393913	1.81887	1.81887	AR-High up vs AR-Low
CD68	0.00886923	1.796	1.796	AR-High up vs AR-Low
STS	0.0456821	1.79447	1.79447	AR-High up vs AR-Low
VCX3B	0.012228	1.79359	1.79359	AR-High up vs AR-Low
AQP3	0.00224306	1.79332	1.79332	AR-High up vs AR-Low
NRG4	0.0488777	1.78815	1.78815	AR-High up vs AR-Low
LIPH	0.013438	1.77818	1.77818	AR-High up vs AR-Low
LOC100130691	0.0478731	1.76138	1.76138	AR-High up vs AR-Low
PGC	0.00149881	1.74072	1.74072	AR-High up vs AR-Low
SELL	0.0115333	1.73854	1.73854	AR-High up vs AR-Low
THY1	0.020266	1.72699	1.72699	AR-High up vs AR-Low
AMDHD1	0.0494102	1.72632	1.72632	AR-High up vs AR-Low
AZGP1	0.02267	1.71717	1.71717	AR-High up vs AR-Low
DIO3	0.031137	1.71414	1.71414	AR-High up vs AR-Low
ST6GALNAC1	0.0019289	1.71044	1.71044	AR-High up vs AR-Low
CD33	0.0498213	1.70726	1.70726	AR-High up vs AR-Low
DEFB132	0.0270473	1.69869	1.69869	AR-High up vs AR-Low
PPAP2A	0.0117604	1.69629	1.69629	AR-High up vs AR-Low
ACPP	0.0340157	1.68989	1.68989	AR-High up vs AR-Low
VCX	0.019757	1.68517	1.68517	AR-High up vs AR-Low
SLC9A9	0.0180399	1.66595	1.66595	AR-High up vs AR-Low
MYO7B	0.0243399	1.66383	1.66383	AR-High up vs AR-Low
LOC90834	0.0184866	1.65807	1.65807	AR-High up vs AR-Low
TRIM34	0.0261887	1.65143	1.65143	AR-High up vs AR-Low
CASP4	0.0356068	1.64984	1.64984	AR-High up vs AR-Low
ASRGL1	0.000136991	1.64812	1.64812	AR-High up vs AR-Low
IGF1R	0.000850946	1.64259	1.64259	AR-High up vs AR-Low
SLC44A5	0.0317983	1.62947	1.62947	AR-High up vs AR-Low
GNAQ	0.0309101	1.62513	1.62513	AR-High up vs AR-Low
MICAL1	0.00504364	1.62405	1.62405	AR-High up vs AR-Low
ZFPM2	0.0406515	1.61494	1.61494	AR-High up vs AR-Low
MBNL2	0.00127028	1.6147	1.6147	AR-High up vs AR-Low
PMCHL2	0.00231958	1.61013	1.61013	AR-High up vs AR-Low
OR7E47P	0.0418612	1.60895	1.60895	AR-High up vs AR-Low
MYLK-AS1	0.0132197	1.60707	1.60707	AR-High up vs AR-Low
GREB1	0.028643	1.60295	1.60295	AR-High up vs AR-Low
HRH2	0.0286082	1.59545	1.59545	AR-High up vs AR-Low
SP100	0.0243215	1.59201	1.59201	AR-High up vs AR-Low
MIR4435-1HG	0.0372086	1.57292	1.57292	AR-High up vs AR-Low
HIST1H2BL	0.0113062	1.56097	1.56097	AR-High up vs AR-Low
HP09053	0.0128101	1.55827	1.55827	AR-High up vs AR-Low
AFF3	0.00978	1.54518	1.54518	AR-High up vs AR-Low
PLP1	0.00216328	1.53637	1.53637	AR-High up vs AR-Low
ARRDC4	0.0455258	1.53583	1.53583	AR-High up vs AR-Low
ARMC12	0.00871558	1.52894	1.52894	AR-High up vs AR-Low
SH3BGRL	0.0113533	1.52569	1.52569	AR-High up vs AR-Low
LYPD6	0.0268784	1.523	1.523	AR-High up vs AR-Low
RBM43	0.00210454	1.52109	1.52109	AR-High up vs AR-Low
B3GALT4	0.00141931	1.51873	1.51873	AR-High up vs AR-Low
CRISPLD1	0.0243831	1.51672	1.51672	AR-High up vs AR-Low
EDAR	0.00933572	1.51496	1.51496	AR-High up vs AR-Low
VWDE	0.0248628	1.51431	1.51431	AR-High up vs AR-Low
NELL2	0.00985629	1.51353	1.51353	AR-High up vs AR-Low
SNORA70	0.0226059	1.51222	1.51222	AR-High up vs AR-Low
HIST1H2AI	0.0116989	1.50186	1.50186	AR-High up vs AR-Low
IFITM2	0.0177406	1.5006	1.5006	AR-High up vs AR-Low
ST7-AS1	0.0369008	0.653156	-1.53103	AR-High down vs AR-Low
LRP4	0.0340136	0.63747	-1.5687	AR-High down vs AR-Low
ST7	0.00373228	0.63164	-1.58318	AR-High down vs AR-Low
DOK6	0.0386896	0.63046	-1.58614	AR-High down vs AR-Low
RPL19P12	0.040011	0.621365	-1.60936	AR-High down vs AR-Low
GPR126	0.00326259	0.616923	-1.62095	AR-High down vs AR-Low
FXYD1	0.0393341	0.6116	-1.63506	AR-High down vs AR-Low
HAGLROS	0.0118547	0.598856	-1.66985	AR-High down vs AR-Low
ANTXR1	0.0110452	0.593945	-1.68366	AR-High down vs AR-Low
LOC101929224	0.0284626	0.590657	-1.69303	AR-High down vs AR-Low
PPP1R3G	0.000449695	0.585922	-1.70671	AR-High down vs AR-Low
LINC00987	0.029808	0.585835	-1.70697	AR-High down vs AR-Low
FAM19A2	0.0358983	0.579448	-1.72578	AR-High down vs AR-Low
DRD4	0.0182252	0.568005	-1.76055	AR-High down vs AR-Low
LINC00689	0.0348721	0.559878	-1.7861	AR-High down vs AR-Low
GRB10	0.043361	0.55733	-1.79427	AR-High down vs AR-Low
TIAM2	0.0210666	0.55562	-1.79979	AR-High down vs AR-Low
TRIM17	0.0239543	0.555347	-1.80068	AR-High down vs AR-Low
JARID2-AS1	0.0298311	0.554575	-1.80318	AR-High down vs AR-Low
LOC101243545	0.0100485	0.523225	-1.91122	AR-High down vs AR-Low
KCNU1	0.0117234	0.515556	-1.93965	AR-High down vs AR-Low
LINC01465	0.0370844	0.51415	-1.94496	AR-High down vs AR-Low
LOC653513	0.0497177	0.504604	-1.98175	AR-High down vs AR-Low
PAX2	0.0243319	0.49883	-2.00469	AR-High down vs AR-Low
TSPY1	0.00025557	0.498442	-2.00625	AR-High down vs AR-Low
SPIB	0.023448	0.496252	-2.0151	AR-High down vs AR-Low
PANDAR	0.0105392	0.494633	-2.0217	AR-High down vs AR-Low
FLJ27354	0.00157225	0.493426	-2.02665	AR-High down vs AR-Low
LOC646626	0.0234434	0.491214	-2.03577	AR-High down vs AR-Low
LAMP3	0.0136993	0.4906	-2.03832	AR-High down vs AR-Low
PGM5	0.0382541	0.480178	-2.08256	AR-High down vs AR-Low
NR2F1-AS1	0.0276532	0.479934	-2.08362	AR-High down vs AR-Low
PSORS1C2	0.0273281	0.464256	-2.15398	AR-High down vs AR-Low
FAM225A	0.0432259	0.454815	-2.1987	AR-High down vs AR-Low
AXDND1	0.0401314	0.453268	-2.2062	AR-High down vs AR-Low
PHKG1	0.00900454	0.451053	-2.21703	AR-High down vs AR-Low
MEF2B	0.0437854	0.450748	-2.21853	AR-High down vs AR-Low
TSPY2	0.0242722	0.449841	-2.22301	AR-High down vs AR-Low
NRXN1	0.0278091	0.448155	-2.23137	AR-High down vs AR-Low
PRTN3	0.0137445	0.414544	-2.41229	AR-High down vs AR-Low
LINC00637	0.0143539	0.408412	-2.4485	AR-High down vs AR-Low
ZNF625-ZNF20	0.0315618	0.394236	-2.53655	AR-High down vs AR-Low
NR2F1	0.00416291	0.391963	-2.55126	AR-High down vs AR-Low
YWHAEP7	0.033544	0.389088	-2.57011	AR-High down vs AR-Low
LOC101929516	0.0288164	0.369882	-2.70356	AR-High down vs AR-Low
IL27	0.0118804	0.357177	-2.79973	AR-High down vs AR-Low
UNC13C	0.00135508	0.343652	-2.90992	AR-High down vs AR-Low
ANGPTL2	0.000715119	0.328951	-3.03997	AR-High down vs AR-Low
SRD5A1P1	0.0172416	0.327567	-3.05281	AR-High down vs AR-Low
C2orf54	0.00740962	0.319949	-3.1255	AR-High down vs AR-Low
PRR35	0.0225803	0.309224	-3.2339	AR-High down vs AR-Low
POU6F1	0.000332488	0.304859	-3.28021	AR-High down vs AR-Low
SNORD22	0.0291247	0.302003	-3.31123	AR-High down vs AR-Low
LILRA3	0.0124651	0.28813	-3.47065	AR-High down vs AR-Low
PROX2	0.0350814	0.286183	-3.49427	AR-High down vs AR-Low
ECEL1P2	0.0412274	0.279892	-3.57281	AR-High down vs AR-Low
GALNTL6	0.00498888	0.277288	-3.60636	AR-High down vs AR-Low
FAM231D	0.00467015	0.270682	-3.69438	AR-High down vs AR-Low
SPINK1	0.0498707	0.263556	-3.79426	AR-High down vs AR-Low
PRDM9	0.046166	0.204495	-4.89009	AR-High down vs AR-Low
RPL31P11	0.00735407	0.199431	-5.01426	AR-High down vs AR-Low
LTB	0.0463206	0.19372	-5.16209	AR-High down vs AR-Low
FOXQ1	0.0389479	0.17678	-5.65674	AR-High down vs AR-Low
LPPR1	0.040573	0.167358	-5.97522	AR-High down vs AR-Low
VSIG8	0.0461862	0.146095	-6.84487	AR-High down vs AR-Low
SCARNA17	0.0169825	0.13796	-7.24849	AR-High down vs AR-Low
SDK1	0.0135777	0.13796	-7.24849	AR-High down vs AR-Low
C5orf60	0.029899	0.12855	-7.77908	AR-High down vs AR-Low
HSPB2-C11orf52	0.0169384	2.91654e-05	-34287.2	AR-High down vs AR-Low
