# Supplementary material for: GREB1 amplifies androgen receptor output in human prostate cancer and contributes to antiandrogen resistance
Source: eLife. 2019 Jan 15;8:e41913. doi: 10.7554/eLife.41913 (PMC6336405; doi:10.7554/eLife.41913)
Supplement: Figure 2—source data 2. [file elife-41913-fig2-data2.xlsx]

## Sheet: 3
Figure2-source data 2 : Summary of Median eGFP Intensity of small-scale shRNA screen
experiment-1						experiment-2
pool#	gene	shRL	sh-target	sh-target/shRL		pool#	gene	shRL	sh-target	sh-target/shRL
1	AR	14724	600	0.0407498		1	AR	13621	326	0.0239336
2	ACPP	14724	17207	1.16864		2	ACPP	13621	11541	0.847295
3	AFF3	14724	18556	1.26026		3	AFF3	13621	13518	0.992438
4	AGR2	14724	14613	0.992461		4	AGR2	13621	9468	0.695103
5	ARRDC4	14724	15367	1.04367		5	ARRDC4	13621	9492	0.696865
6	AZGP1	14724	12792	0.868786		6	AZGP1	13621	10414	0.764555
7	CASP4	14724	15483	1.05155		7	CASP4	13621	10207	0.749358
8	CRYAB	14724	17469	1.18643		8	CRYAB	13621	9979	0.732619
9	DPP4	14724	16037	1.08917		9	DPP4	13621	11805	0.866676
10	ELL2	14724	13183	0.895341		10	ELL2	13621	10732	0.787901
11	EPDR1	14724	14251	0.967876		11	EPDR1	13621	10840	0.79583
12	FAM105A	14724	14835	1.00754		12	FAM105A	13621	12381	0.908964
13	GHRHR	14724	8460	0.574572		13	GHRHR	13621	8652	0.635196
14	GREB1	14724	4816	0.327085		14	GREB1	13621	3500	0.256956
15	HIST1H2AI	14724	13655	0.927397		15	HIST1H2AI	13621	9831	0.721753
16	ID4	14724	16487	1.11974		16	ID4	13621	11984	0.879818
17	KLF8	14724	9119	0.619329		17	KLF8	13621	7967	0.584906
18	KLHL41/KBTBD10	14724	15679	1.06486		18	KLHL41/KBTBD10	13621	9930	0.729021
19	LHX9	14724	15405	1.04625		19	LHX9	13621	11924	0.875413
20	LIPH	14724	15213	1.03321		20	LIPH	13621	9979	0.732619
21	MICAL1	14724	16446	1.11695		21	MICAL1	13621	11924	0.875413
22	MYBPC1	14724	17513	1.18942		22	MYBPC1	13621	12728	0.934439
23	PDE11A	14724	16487	1.11974		23	PDE11A	13621	12792	0.939138
24	PGC	14724	14179	0.962986		24	PGC	13621	10030	0.736363
25	PPAP2A	14724	13485	0.915852		25	PPAP2A	13621	9397	0.689891
26	RBP4	14724	17294	1.17454		26	RBP4	13621	11004	0.80787
27	SLC9A9	14724	14002	0.950964		27	SLC9A9	13621	10598	0.778063
28	SOX6	14724	15175	1.03063		28	SOX6	13621	12986	0.953381
29	SP100	14724	17735	1.2045		29	SP100	13621	12044	0.884223
30	SP9	14724	14395	0.977656		30	SP9	13621	10759	0.789883
31	STEAP4	14724	14761	1.00251		31	STEAP4	13621	10440	0.766464
32	STS	14724	13552	0.920402		32	STS	13621	12824	0.941487
33	TXNIP	14724	16446	1.11695		33	TXNIP	13621	10414	0.764555
34	ZFPM2	14724	17601	1.1954		34	ZFPM2	13621	13862	1.01769
