# Supplementary material for: GREB1 amplifies androgen receptor output in human prostate cancer and contributes to antiandrogen resistance
Source: eLife. 2019 Jan 15;8:e41913. doi: 10.7554/eLife.41913 (PMC6336405; doi:10.7554/eLife.41913)
Supplement: Figure 2—source data 3. [file elife-41913-fig2-data3.xlsx]

## Sheet: Sheet1
Figure2-source data 3: AR scores and RNA levels of GREB1, GHRHR and KLF8 of 333 TCGA cases
Sample Id	AR Score	GREB1: mRNA expression (RNA Seq V2 RSEM)	GHRHR: mRNA expression (RNA Seq V2 RSEM)	KLF8: mRNA expression (RNA Seq V2 RSEM)
TCGA-VN-A88I-01	-18.17	2819.54	2.2989	147.701
TCGA-V1-A8WV-01	-17.37	594.997	1.6227	62.2042
TCGA-EJ-A7NM-01	-15.03	466.012	2.7229	43.5671
TCGA-TK-A8OK-01	-14.82	2593.89	1.7715	174.934
TCGA-CH-5743-01	-14.11	985.157	0	191.232
TCGA-XJ-A9DI-01	-14.06	1671.39	16.1369	161.369
TCGA-KC-A4BL-01	-13.84	5192.34	0.4255	142.979
TCGA-YL-A8SK-01	-13.83	2518.63	0.8666	159.879
TCGA-FC-A8O0-01	-13.56	924.111	8.1652	146.494
TCGA-HC-7079-01	-13.3	1204.65	0	190.209
TCGA-VP-A872-01	-12.48	298.614	0	35.1661
TCGA-KK-A8IH-01	-12.26	1415.94	0.6698	65.6397
TCGA-HI-7170-01	-12.02	1454.3	0.895	102.472
TCGA-YL-A9WH-01	-11.8	459.779	1.1932	25.4549
TCGA-HC-A8D0-01	-11.74	1063.12	5.2601	84.1613
TCGA-J9-A52B-01	-11.51	1204.41	179.467	25.4202
TCGA-G9-6365-01	-10.39	1354.94	4.1142	68.9125
TCGA-G9-6356-01	-10.25	2129.04	1.5226	71.9452
TCGA-G9-7523-01	-10.23	4951.99	0	120.387
TCGA-VP-A87C-01	-10.12	1995.9	5.7342	96.6619
TCGA-G9-6364-01	-10.11	4145.77	7.5321	54.0541
TCGA-J9-A8CM-01	-9.99	1065.91	8.2373	55.4645
TCGA-EJ-7328-01	-9.95	2064	2.0188	107.803
TCGA-ZG-A8QW-01	-9.71	818.546	4.3474	62.1051
TCGA-M7-A71Y-01	-9.5	2915.28	0.5724	76.1305
TCGA-XQ-A8TA-01	-9.26	397.884	0	29.4575
TCGA-G9-6378-01	-9.16	7018.38	2.3711	76.4671
TCGA-YL-A8SA-01	-9.14	3837.93	11.1955	23.4573
TCGA-YL-A8SF-01	-9.08	895.63	18.6678	84.4294
TCGA-KK-A6E6-01	-8.86	653.76	7.6542	39.1715
TCGA-KK-A7B3-01	-8.85	2889.14	1.1507	63.2911
TCGA-XJ-A9DK-01	-8.83	3134.48	1.8694	138.334
TCGA-EJ-5514-01	-8.8	253.292	2.6839	75.1489
TCGA-KK-A8I8-01	-8.55	1972.13	54.0984	46.9945
TCGA-HC-A48F-01	-8.48	1075.93	5.8091	36.9295
TCGA-G9-6329-01	-8.33	1990.07	29.7855	70.2939
TCGA-YL-A8SL-01	-8.05	402.402	5.891	15.8604
TCGA-V1-A8WW-01	-8.03	366.869	7.9481	34.3024
TCGA-EJ-5501-01	-7.94	2940.51	0.9241	56.3706
TCGA-EJ-7792-01	-7.88	3515.87	2.2898	131.501
TCGA-ZG-A8QZ-01	-7.67	940.534	3.6408	95.8738
TCGA-YL-A8SJ-01	-7.54	3120.14	1.6835	108.868
TCGA-CH-5769-01	-7.51	616.517	1.8941	74.8154
TCGA-2A-A8VT-01	-7.5	1691.91	3.6765	67.2794
TCGA-EJ-7315-01	-7.43	409.538	7.2254	43.9306
TCGA-J4-A6G3-01	-7.43	2646.44	12.4968	97.0905
TCGA-EJ-5495-01	-7.26	3190.21	21.0714	96.6043
TCGA-J4-A6G1-01	-7.19	931.096	5.8166	117.673
TCGA-KK-A8I4-01	-7.1	648.137	27.2028	73.7236
TCGA-EJ-5507-01	-7.09	576.259	2.6296	67.994
TCGA-EJ-A7NG-01	-7.07	6798.75	2.0115	134.768
TCGA-J9-A8CK-01	-6.87	2704.48	22.9621	61.9977
TCGA-HI-7168-01	-6.8	1859.12	4.341	103.788
TCGA-KK-A6DY-01	-6.79	2966.92	13.7694	73.0541
TCGA-V1-A8MJ-01	-6.79	4079.87	1.507	47.7207
TCGA-HC-7232-01	-6.61	4137.75	43.6039	50.5409
TCGA-HC-8266-01	-6.59	3876.86	1.1765	117.647
TCGA-V1-A8MU-01	-6.56	4289.51	11.8652	103.465
TCGA-CH-5791-01	-6.54	1081.07	8.5482	48.4399
TCGA-G9-6370-01	-6.32	4160.89	0.3536	111.386
TCGA-KC-A7FE-01	-6.3	4259.49	1.6953	126.301
TCGA-YL-A8HO-01	-6.21	2964.1	7.5275	173.133
TCGA-YL-A8HJ-01	-6.17	1825.25	0.864	148.612
TCGA-KC-A4BV-01	-6.14	2558.96	2.6529	75.8721
TCGA-KC-A7F6-01	-6.14	1631.7	8.4666	54.0922
TCGA-G9-6342-01	-6.06	4353.5	14.8955	46.5032
TCGA-YL-A8SO-01	-6	1865.07	6.4	58.1333
TCGA-HC-7081-01	-5.96	1664.69	5.9435	80.2377
TCGA-EJ-5521-01	-5.74	1615.72	3.1903	24.0719
TCGA-KK-A7B4-01	-5.68	1335.82	9.4931	40.6849
TCGA-VP-A879-01	-5.68	2900.52	5.9531	95.7069
TCGA-KK-A8IB-01	-5.56	993.668	12.6649	33.2454
TCGA-SU-A7E7-01	-5.55	4006.64	0	127.876
TCGA-EJ-5499-01	-5.27	889.121	3.4895	51.6444
TCGA-YL-A8HK-01	-5.11	659.851	13.37	95.5564
TCGA-KK-A8IA-01	-5.05	2698.8	8.5763	39.7942
TCGA-V1-A8WS-01	-5	1346.61	30.6122	37.5247
TCGA-HI-7171-01	-4.96	920.989	32.714	52.0243
TCGA-EJ-7327-01	-4.81	1869.76	5.4645	112.933
TCGA-HC-A76W-01	-4.8	2719.6	1.4306	93.9437
TCGA-KC-A7FA-01	-4.78	6518.06	0.4948	68.7778
TCGA-CH-5794-01	-4.75	1453.03	6.7985	38.3189
TCGA-CH-5792-01	-4.69	5121.89	4.12	75.7043
TCGA-CH-5771-01	-4.57	1940.71	0.9264	78.9717
TCGA-HC-A8D1-01	-4.48	6527.94	3.992	131.737
TCGA-XQ-A8TB-01	-4.47	4167.05	1.3806	57.5242
TCGA-HC-7213-01	-4.25	481.481	2.4929	29.9145
TCGA-HC-7740-01	-4.09	4886.4	1.2669	145.693
TCGA-HC-7233-01	-4.01	4616.2	3.8777	64.863
TCGA-KK-A59Y-01	-3.77	7814.14	9.388	31.4775
TCGA-KK-A8IL-01	-3.77	7264.24	4.4863	87.9318
TCGA-CH-5762-01	-3.7	2934.71	0.4242	73.8026
TCGA-EJ-8472-01	-3.69	4097.58	0.6776	50.4828
TCGA-YL-A8SC-01	-3.67	5717.98	0.3539	51.6631
TCGA-VP-A876-01	-3.54	485.963	12.2046	28.2924
TCGA-EJ-A46D-01	-3.31	6560.61	9.324	82.1678
TCGA-J4-A83I-01	-3.27	3241.28	8.9896	65.4441
TCGA-YL-A8HL-01	-3.24	11937.1	4.6102	44.4258
TCGA-EJ-A7NK-01	-3.23	4800.79	0.5659	164.12
TCGA-J4-8198-01	-3.22	5815.64	17.5439	118.806
TCGA-EJ-A6RC-01	-3.12	4826.2	12.3314	94.4123
TCGA-VN-A88L-01	-3.1	3422.81	11.5942	93.7618
TCGA-CH-5764-01	-3.07	1151.87	4.8912	70.9217
TCGA-EJ-A8FU-01	-3.04	4877.28	3.7513	127.01
TCGA-G9-6361-01	-2.93	2814.65	4.5267	56.5839
TCGA-G9-6348-01	-2.89	1125.84	1.2808	49.952
TCGA-M7-A720-01	-2.84	4602.7	0.3861	145.174
TCGA-HC-8262-01	-2.79	2947.82	2.9597	108.85
TCGA-HC-7077-01	-2.72	6947.16	2.4831	16.4507
TCGA-V1-A8MG-01	-2.72	5369.83	13.3511	102.804
TCGA-FC-7961-01	-2.71	2856.5	65.8325	70.3416
TCGA-EJ-5510-01	-2.7	3212.1	2.5875	46.899
TCGA-KK-A8I5-01	-2.69	2535.39	4.8314	57.9762
TCGA-CH-5754-01	-2.68	305.565	12.8498	69.9118
TCGA-EJ-5498-01	-2.64	1528.4	2.1436	122.722
TCGA-EJ-7783-01	-2.56	3289.54	6.714	119.02
TCGA-HC-7750-01	-2.56	5047.01	1.7786	76.4788
TCGA-J4-A83K-01	-2.5	7142.38	4.5395	94.6312
TCGA-KC-A4BR-01	-2.47	5167.78	5.2281	142.11
TCGA-HC-7231-01	-2.46	3054.67	0.7241	47.7915
TCGA-EJ-5506-01	-2.44	6778.21	0.641	147.756
TCGA-G9-6363-01	-2.43	753.34	1.0277	27.7492
TCGA-EJ-8474-01	-2.29	2149.26	2.611	80.5048
TCGA-CH-5738-01	-2.04	3968.14	2.327	87.4274
TCGA-KK-A8I9-01	-2.01	3932.68	14.742	55.0369
TCGA-HC-A631-01	-1.98	660.944	0.4769	34.8116
TCGA-KK-A7AU-01	-1.86	2509.67	17.4441	25.0284
TCGA-EJ-A8FN-01	-1.78	6064.55	2.9791	69.5134
TCGA-HC-A632-01	-1.72	287.085	39.5262	80.6127
TCGA-CH-5766-01	-1.66	5593.37	1.0356	83.5347
TCGA-J4-A83M-01	-1.59	2576.4	0.8436	42.6026
TCGA-EJ-7321-01	-1.47	2787.62	2.9674	45.7821
TCGA-HC-7742-01	-1.45	2928.33	3.0019	61.1632
TCGA-ZG-A8QX-01	-1.41	5112.11	29.1675	50.9403
TCGA-HC-8265-01	-1.38	6140.09	4.4709	74.0189
TCGA-KK-A6E1-01	-1.27	508.157	3.2396	34.2474
TCGA-HC-7736-01	-1.23	3949.24	5.5234	133.088
TCGA-KK-A59X-01	-1.21	4570.22	47.6948	37.0959
TCGA-KK-A7AP-01	-1.18	3575.9	5.5232	14.9916
TCGA-VN-A88P-01	-1.15	7927.17	0	32.515
TCGA-G9-6366-01	-1.14	4859.11	2.2414	23.0548
TCGA-EJ-A6RA-01	-0.95	5104.52	5.0251	81.9095
TCGA-QU-A6IP-01	-0.95	4939.69	6.7161	68.8401
TCGA-CH-5761-01	-0.89	2883.41	3.7328	44.4541
TCGA-VN-A88K-01	-0.89	4429.39	1.2543	22.9957
TCGA-EJ-5527-01	-0.83	2437.29	2.1682	98.3806
TCGA-EJ-A65F-01	-0.69	6405.29	2.5611	75.1254
TCGA-EJ-5494-01	-0.67	6129.87	21.5784	45.954
TCGA-KK-A59Z-01	-0.67	3164.54	1252.61	42.8737
TCGA-EJ-A46I-01	-0.64	6851.65	2.8752	140.886
TCGA-KK-A6E2-01	-0.55	1085.57	3.9984	30.7877
TCGA-G9-7522-01	-0.54	5718.45	7.2192	87.1859
TCGA-KK-A8IF-01	-0.54	5204.8	80.3629	15.5541
TCGA-V1-A8MF-01	-0.53	3197.41	17.4757	104.854
TCGA-CH-5740-01	-0.5	1223.02	15.3492	63.2387
TCGA-KK-A8IK-01	-0.48	4456.82	266.852	24.5125
TCGA-EJ-7788-01	-0.43	2807.54	1.0054	60.9971
TCGA-EJ-5511-01	-0.32	2511.16	0.2362	46.0612
TCGA-KK-A7B1-01	-0.23	571.429	20.261	64.5604
TCGA-CH-5789-01	-0.09	5824.12	4.1384	88.286
TCGA-KK-A8II-01	-0.07	1989.41	25.1957	51.0912
TCGA-YL-A8S8-01	-0.02	7465.55	63.2054	62.3455
TCGA-EJ-5504-01	0.03	5290.19	21.6865	65.0596
TCGA-EJ-A8FS-01	0.04	4884.73	16.7006	38.6965
TCGA-FC-7708-01	0.04	5831.24	9.9556	111.572
TCGA-G9-6385-01	0.06	5919.32	3.1847	103.326
TCGA-CH-5763-01	0.14	3487.73	0.4607	163.077
TCGA-CH-5768-01	0.17	2512.35	1.6852	63.0277
TCGA-G9-6336-01	0.29	7122.3	3.5412	61.2116
TCGA-HC-8213-01	0.36	5632.49	9.9059	49.0342
TCGA-KK-A7AV-01	0.43	6365.07	8.4166	79.4319
TCGA-KK-A8IG-01	0.49	5660.1	20.6897	58.1281
TCGA-2A-A8VO-01	0.69	5437.94	7.3108	67.7914
TCGA-CH-5739-01	0.71	1705.48	4.7695	69.9523
TCGA-EJ-7791-01	0.74	8078.28	4.8634	132.469
TCGA-HC-7747-01	0.93	4012.81	4.9587	47.5207
TCGA-EJ-5502-01	0.95	4368.8	1.8614	93.072
TCGA-YL-A9WJ-01	0.95	6694.51	11.9119	91.8372
TCGA-HC-7818-01	1.04	6423.1	3.9604	60.7261
TCGA-V1-A8ML-01	1.07	5645.83	15.5394	40.1018
TCGA-EJ-5512-01	1.14	2781.87	3.966	83.2861
TCGA-EJ-5524-01	1.17	4187.03	2.9512	70.4602
TCGA-EJ-7785-01	1.23	835.97	21.6486	91.3128
TCGA-J4-A67T-01	1.34	4395.03	5.5698	104.113
TCGA-EJ-A7NF-01	1.35	2600.19	25.2305	54.3426
TCGA-CH-5765-01	1.36	3304.41	14.6956	37.7887
TCGA-EJ-7314-01	1.43	3236.39	41.4023	56.0935
TCGA-CH-5744-01	1.51	2422.33	10.8645	38.6038
TCGA-HC-8257-01	1.52	3545.62	21.7523	78.147
TCGA-KK-A6E5-01	1.55	7762.24	0	65.416
TCGA-EJ-A46G-01	1.6	7300.54	8.1522	75.5435
TCGA-HC-7744-01	1.62	1520.79	1.0822	41.8433
TCGA-EJ-5503-01	1.71	4735.87	0.9501	101.9
TCGA-G9-7510-01	1.75	8115.28	4.5337	65.0907
TCGA-WW-A8ZI-01	1.76	8089.31	0	69.6754
TCGA-EJ-7794-01	1.77	7404.72	6.801	114.97
TCGA-VP-A87B-01	1.81	4519.02	43.0649	41.9463
TCGA-HC-7749-01	1.82	3146.93	0.5762	56.4679
TCGA-HC-8264-01	1.84	11513.3	1.3876	137.716
TCGA-VP-A87J-01	1.93	3759.73	0.3743	37.4251
TCGA-2A-A8VV-01	1.94	4191.08	7.5303	58.8305
TCGA-CH-5746-01	1.95	6027.15	13.4093	95.2062
TCGA-EJ-5531-01	2.05	5063.73	7.3305	69.2323
TCGA-EJ-5542-01	2.05	4520.71	8.0827	119.064
TCGA-FC-A4JI-01	2.16	3565.91	40.9028	5.5274
TCGA-EJ-A7NH-01	2.22	7297.42	5.2462	165.456
TCGA-G9-6377-01	2.27	3187.78	10.4948	32.9835
TCGA-KK-A8IC-01	2.28	2362.89	3.7566	94.29
TCGA-M7-A725-01	2.4	6283.32	2.8143	38.6969
TCGA-XA-A8JR-01	2.54	9401.19	2.7144	63.5179
TCGA-YL-A8SB-01	2.57	6039.47	3.1578	221.946
TCGA-VN-A88Q-01	2.61	3133.03	28.5068	40.2715
TCGA-J9-A8CP-01	2.63	4146.13	40.954	55.381
TCGA-VP-A87D-01	2.64	6822.1	12.3885	40.6343
TCGA-G9-6353-01	2.65	7331.73	5.1775	102.811
TCGA-HC-7748-01	2.82	3770.68	7.4059	112.941
TCGA-HC-7209-01	2.84	1727.06	7.7429	53.4262
TCGA-EJ-5522-01	2.89	3317.28	1.0585	126.224
TCGA-EJ-5525-01	2.91	288.136	2.511	37.037
TCGA-H9-7775-01	2.91	4199.98	3.6481	47.7572
TCGA-EJ-5508-01	2.93	4901.98	4.5708	117.826
TCGA-EJ-7781-01	2.97	6487.09	3.269	81.7261
TCGA-CH-5752-01	3.06	3401.68	19.9871	51.5796
TCGA-ZG-A8QY-01	3.1	5446.23	17.2722	65.2975
TCGA-CH-5790-01	3.21	1879.52	10.336	69.0878
TCGA-J4-8200-01	3.25	6150.48	6.05	67.9457
TCGA-YL-A8SH-01	3.33	6797.57	40.6977	99.8943
TCGA-HC-8256-01	3.37	12447.2	3.5647	63.7687
TCGA-HC-A4ZV-01	3.49	2000	2.772	49.203
TCGA-V1-A8WL-01	3.56	7972.96	6.0096	79.3269
TCGA-HC-7078-01	3.65	8178.12	14.8796	67.8337
TCGA-KC-A7F3-01	3.7	5224.93	18.5208	61.7361
TCGA-EJ-5518-01	3.73	11471.2	22.3048	52.0446
TCGA-J4-A83N-01	3.8	5204.3	6.993	23.4765
TCGA-HC-7212-01	3.9	1707.43	8.5848	43.2421
TCGA-EJ-5509-01	3.92	5306.82	92.7945	58.7984
TCGA-EJ-5530-01	4.05	2395.35	7.6607	68.3995
TCGA-VP-A87E-01	4.05	5872.94	2.531	93.141
TCGA-EJ-7330-01	4.14	5343.97	88.0329	141.659
TCGA-KK-A8IJ-01	4.23	14515.1	4.5586	37.7124
TCGA-2A-A8W3-01	4.3	5652.01	5.7248	51.9321
TCGA-CH-5750-01	4.32	4701.69	0	68.2058
TCGA-EJ-5516-01	4.32	959.864	5.536	82.1889
TCGA-EJ-8468-01	4.34	6502.45	5.5905	100.629
TCGA-J4-A6M7-01	4.39	4383.24	24.0018	80.006
TCGA-CH-5741-01	4.5	3601.76	18.989	35.9252
TCGA-HC-7820-01	4.52	5510.41	1.4426	94.1304
TCGA-G9-6384-01	4.58	5489.36	17.3798	96.9144
TCGA-G9-7519-01	4.65	7346.65	2.2258	33.7581
TCGA-EJ-7797-01	4.68	2892.92	7.7938	67.6645
TCGA-KK-A8I6-01	4.77	2745.95	5.4054	57.529
TCGA-VP-A87K-01	4.78	1748.1	13.0482	31.5332
TCGA-KC-A7FD-01	4.85	2679.95	3.4169	29.2331
TCGA-YL-A9WI-01	4.85	2827.35	0.9838	20.6591
TCGA-Y6-A8TL-01	5.26	8561.34	8.4503	69.413
TCGA-M7-A721-01	5.46	5463.71	24.8417	62.3478
TCGA-VP-A87H-01	5.49	4398.51	9.7292	47.2559
TCGA-YL-A8S9-01	5.51	5857.03	38.1862	16.3655
TCGA-EJ-7115-01	5.53	6109.7	12.5367	63.0754
TCGA-G9-7521-01	5.53	4482.06	0.2739	39.4412
TCGA-VN-A88N-01	5.64	13464.3	1.8422	38.2247
TCGA-EJ-5526-01	5.68	4988.69	18.098	101.215
TCGA-HC-A76X-01	5.69	2700.96	21.5311	41.2679
TCGA-G9-6367-01	5.7	5056.49	4.2903	87.2363
TCGA-HC-8261-01	5.85	8369.39	41.0429	69.3019
TCGA-VP-A878-01	5.91	4108.09	28.0851	101.702
TCGA-EJ-7784-01	6.08	3256.19	8.0446	57.5495
TCGA-V1-A8X3-01	6.18	7339.16	0.4062	63.3631
TCGA-EJ-7782-01	6.21	5443.32	73.5905	61.4243
TCGA-G9-6371-01	6.31	8197.59	5.7068	33.5692
TCGA-EJ-8470-01	6.38	7571.65	0.6341	102.727
TCGA-CH-5751-01	6.7	1997.4	0.5192	80.4777
TCGA-EJ-7789-01	6.7	15550.4	40.7512	32.6858
TCGA-EJ-7331-01	6.79	8765.07	0.308	99.7921
TCGA-V1-A8WN-01	6.85	7930.21	13.7407	184.415
TCGA-YL-A8SP-01	6.91	2360.98	37.664	42.3191
TCGA-HC-8260-01	6.97	6948.68	5.6675	203.4
TCGA-EJ-7318-01	7.01	3387.05	2.9101	42.5609
TCGA-HC-7211-01	7.21	10974.6	7.6674	70.7756
TCGA-CH-5788-01	7.23	1953.82	0.7215	16.5945
TCGA-KK-A8ID-01	7.28	7315.27	3.1885	23.5153
TCGA-HC-8216-01	7.34	3914.09	8.9385	68.5289
TCGA-XJ-A83H-01	7.45	4327.04	3.7736	77.3585
TCGA-EJ-5496-01	7.56	2167.15	15.8046	68.4866
TCGA-KC-A4BN-01	7.86	9582.46	30.5052	80.0763
TCGA-CH-5753-01	8.86	3933.61	0.4612	57.1826
TCGA-EJ-A7NJ-01	8.99	9363.17	1.6086	175.336
TCGA-HC-7821-01	9.01	8170.02	3.1615	59.7172
TCGA-2A-A8VL-01	9.17	9204.43	6.1792	150.875
TCGA-EJ-5517-01	9.27	6192.07	2.5189	61.398
TCGA-XJ-A83G-01	9.42	7702.24	2.0822	31.2337
TCGA-HC-7075-01	9.51	9896.95	7.1232	47.385
TCGA-HC-A8CY-01	9.59	3247.24	1.9914	26.6853
TCGA-EJ-5519-01	9.87	11751.2	12.6722	39.9449
TCGA-G9-6351-01	9.93	7522.54	16.5885	61.3054
TCGA-EJ-A65E-01	9.96	8053.68	39.0818	63.0959
TCGA-FC-A5OB-01	10.22	14166.7	1.8832	3.7665
TCGA-G9-6499-01	10.38	6610.44	5.4181	26.0069
TCGA-VN-A88R-01	10.39	6426	35.3767	22.2531
TCGA-HC-8258-01	10.41	7164.58	6.2724	133.512
TCGA-EJ-8469-01	10.53	571.765	5.6292	41.8169
TCGA-YL-A8SR-01	10.74	17049.7	46.9874	72.0473
TCGA-EJ-5497-01	10.77	3947.16	7.6611	110.66
TCGA-YL-A8SQ-01	10.78	9215.38	7.1429	78.022
TCGA-EJ-7786-01	11.13	6747.42	85.3789	76.4852
TCGA-G9-6494-01	11.6	6844.89	6.5654	61.1407
TCGA-EJ-7125-01	11.64	9236.06	43.0508	51.3298
TCGA-CH-5748-01	11.94	9437.45	17.9316	50.8757
TCGA-VP-A875-01	11.94	2226.64	16.0584	24.4526
TCGA-EJ-7793-01	12.3	5802.05	20.1104	96.2145
TCGA-YJ-A8SW-01	12.35	12007.9	62.2302	53.9568
TCGA-HC-7230-01	12.58	2592.23	7.5805	33.7966
TCGA-EJ-A65J-01	12.7	2514.3	6.5247	36.4613
TCGA-CH-5772-01	12.81	6272.73	2.3715	55.336
TCGA-HC-7080-01	12.98	11305	58.2007	34.5747
TCGA-G9-6333-01	13.24	7376.74	35.272	53.6585
TCGA-EJ-5532-01	13.54	9007.57	24.8184	63.862
TCGA-EJ-5515-01	13.87	9384	3.4823	138.423
TCGA-VN-A88O-01	14.45	13002.9	33.1073	56.0984
TCGA-EJ-7123-01	14.71	9032.57	27.1186	45.0995
TCGA-CH-5737-01	14.8	4703.07	13.1527	70.9446
TCGA-KK-A6E0-01	15.32	4424.41	73.2632	32.0798
TCGA-HC-7210-01	15.9	5956.5	11.6269	55.8735
TCGA-EJ-7218-01	16.14	7378.82	37.0132	30.898
TCGA-J9-A8CN-01	16.52	9021.79	22.905	34.6369
TCGA-J9-A8CL-01	17.56	9204.04	6.1659	57.1749
TCGA-2A-A8W1-01	17.61	4538.78	14.166	28.8042
TCGA-EJ-7317-01	18.4	8750.19	1.5349	48.7337
TCGA-EJ-A65G-01	18.9	6753.91	1.1581	37.0585
TCGA-EJ-5505-01	21.68	7426.43	10.3571	77.5
TCGA-YL-A8HM-01	22.75	2708.66	36.0547	21.9644
TCGA-HC-7737-01	23.02	6254.8	9.9923	82.2444
TCGA-CH-5767-01	26.54	10348.6	8.9955	46.1019
