# Supplementary material for: GREB1 amplifies androgen receptor output in human prostate cancer and contributes to antiandrogen resistance
Source: eLife. 2019 Jan 15;8:e41913. doi: 10.7554/eLife.41913 (PMC6336405; doi:10.7554/eLife.41913)
Supplement: Figure 4—source data 1. [file elife-41913-fig4-data1.xlsx]

## Sheet: 4
Figure4-source data 1 : Upregulated genes in ARsig-hi shRenilla DHT vs. veh (log2Fold change ≥ 0.6, p < 0.05)
Gene_name	Description	baseMean	log2FoldChange	lfcSE	stat	pvalue	padj
C1orf85	chromosome 1 open reading frame 85 [Source:HGNC Symbol;Acc:29436]	3817.52	0.601631	0.0400135	15.0357	4.28e-51	1.62e-49
SMPD1	sphingomyelin phosphodiesterase 1, acid lysosomal [Source:HGNC Symbol;Acc:11120]	4090.7	0.602961	0.0314908	19.1472	1.02e-81	6.27e-80
RP11-554D14.2		57.6407	0.603473	0.186864	3.22947	0.0012402	0.00466413
PLCH2	phospholipase C, eta 2 [Source:HGNC Symbol;Acc:29037]	124.295	0.604152	0.144638	4.17699	2.95e-05	0.000145668
AC003991.3		2.72045	0.60453	0.142303	4.24819	2.16e-05	0.000108722
RP11-738O11.13		50.5756	0.604571	0.20236	2.98761	0.00281169	0.00985528
SMIM1	small integral membrane protein 1 [Source:HGNC Symbol;Acc:44204]	162.012	0.604857	0.12948	4.67143	2.99e-06	1.7e-05
ZFP2	ZFP2 zinc finger protein [Source:HGNC Symbol;Acc:26138]	177.83	0.606418	0.134088	4.52252	6.11e-06	3.32e-05
RAB4A	RAB4A, member RAS oncogene family [Source:HGNC Symbol;Acc:9781]	5470.02	0.606438	0.0320325	18.9319	6.22e-80	3.69e-78
DYNLRB2	dynein, light chain, roadblock-type 2 [Source:HGNC Symbol;Acc:15467]	58.6443	0.60732	0.18885	3.21588	0.00130043	0.0048734
CREB3L1	cAMP responsive element binding protein 3-like 1 [Source:HGNC Symbol;Acc:18856]	27.3657	0.608172	0.217563	2.79538	0.00518383	0.0170861
MAF	v-maf avian musculoaponeurotic fibrosarcoma oncogene homolog [Source:HGNC Symbol;Acc:6776]	6.98113	0.608674	0.188379	3.23111	0.00123309	0.00463971
C1QTNF3	C1q and tumor necrosis factor related protein 3 [Source:HGNC Symbol;Acc:14326]	182.16	0.609578	0.133693	4.55955	5.13e-06	2.82e-05
RP11-142C4.4		53.9862	0.609964	0.186898	3.26362	0.0011	0.00417976
SYT5	synaptotagmin V [Source:HGNC Symbol;Acc:11513]	37.0089	0.61055	0.208043	2.93473	0.00333838	0.0115027
FKBP1B	FK506 binding protein 1B, 12.6 kDa [Source:HGNC Symbol;Acc:3712]	89.2718	0.610679	0.1794	3.404	0.00066407	0.00263612
TCL6	T-cell leukemia/lymphoma 6 (non-protein coding) [Source:HGNC Symbol;Acc:13463]	36.8758	0.611838	0.20401	2.99906	0.00270812	0.00952213
MUC5B	mucin 5B, oligomeric mucus/gel-forming [Source:HGNC Symbol;Acc:7516]	38.9262	0.613432	0.205481	2.98534	0.00283261	0.00991767
RP11-214C8.5		1738.08	0.613742	0.0497649	12.3328	6.03e-35	1.61e-33
PRKCD	protein kinase C, delta [Source:HGNC Symbol;Acc:9399]	4650.92	0.613876	0.0293552	20.912	4.17e-97	3.12e-95
ABCC1	ATP-binding cassette, sub-family C (CFTR/MRP), member 1 [Source:HGNC Symbol;Acc:51]	18819.1	0.614452	0.0530586	11.5806	5.17e-31	1.22e-29
MAFF	v-maf avian musculoaponeurotic fibrosarcoma oncogene homolog F [Source:HGNC Symbol;Acc:6780]	224.386	0.615167	0.123395	4.98535	6.19e-07	3.85e-06
TCEA3	transcription elongation factor A (SII), 3 [Source:HGNC Symbol;Acc:11615]	35.6641	0.615467	0.207354	2.9682	0.00299547	0.0104323
CPSF1P1	cleavage and polyadenylation specific factor 1, 160kDa pseudogene 1 [Source:HGNC Symbol;Acc:19251]	982.992	0.615938	0.0649601	9.48179	2.5e-21	4.19e-20
TWIST1	twist basic helix-loop-helix transcription factor 1 [Source:HGNC Symbol;Acc:12428]	728.891	0.615938	0.0811561	7.58955	3.21e-14	3.75e-13
SMIM14	small integral membrane protein 14 [Source:HGNC Symbol;Acc:27321]	3913.83	0.617131	0.0397103	15.5408	1.84e-54	7.36e-53
RHBDF1	rhomboid 5 homolog 1 (Drosophila) [Source:HGNC Symbol;Acc:20561]	2048.96	0.619172	0.0554402	11.1683	5.83e-29	1.31e-27
HOMER2	homer homolog 2 (Drosophila) [Source:HGNC Symbol;Acc:17513]	10052.3	0.619672	0.0288754	21.4602	3.67e-102	2.92e-100
PDE9A	phosphodiesterase 9A [Source:HGNC Symbol;Acc:8795]	4351.85	0.620639	0.031157	19.9197	2.75e-88	1.84e-86
AC074286.1		9.84798	0.62314	0.20676	3.01384	0.00257965	0.00911637
CAPZB	capping protein (actin filament) muscle Z-line, beta [Source:HGNC Symbol;Acc:1491]	12896.9	0.623154	0.0238111	26.1708	5.72e-151	7.56e-149
ZNF350	zinc finger protein 350 [Source:HGNC Symbol;Acc:16656]	1683.84	0.623277	0.0573512	10.8677	1.64e-27	3.5e-26
AC110619.1		9.2177	0.623435	0.206039	3.02581	0.00247967	0.0087881
AC140481.7		7.23385	0.623778	0.193161	3.22931	0.00124088	0.00466589
FAM166B	family with sequence similarity 166, member B [Source:HGNC Symbol;Acc:34242]	99.002	0.624141	0.157683	3.9582	7.55e-05	0.000350921
ZMIZ1-AS1	ZMIZ1 antisense RNA 1 [Source:HGNC Symbol;Acc:27433]	159.356	0.624733	0.139013	4.49407	6.99e-06	3.76e-05
KRT8P3	keratin 8 pseudogene 3 [Source:HGNC Symbol;Acc:31056]	35.6026	0.625394	0.211017	2.96371	0.00303957	0.0105737
SERINC5	serine incorporator 5 [Source:HGNC Symbol;Acc:18825]	6597.59	0.626827	0.03047	20.5719	4.9e-94	3.52e-92
RFX6	regulatory factor X, 6 [Source:HGNC Symbol;Acc:21478]	33.5968	0.627912	0.207299	3.02901	0.00245354	0.00870238
ZG16	zymogen granule protein 16 [Source:HGNC Symbol;Acc:30961]	4.55673	0.629905	0.169875	3.70805	0.000208858	0.000906054
SLC35F2	solute carrier family 35, member F2 [Source:HGNC Symbol;Acc:23615]	5199.37	0.63165	0.0334083	18.907	9.99e-80	5.9e-78
OLAH	oleoyl-ACP hydrolase [Source:HGNC Symbol;Acc:25625]	18.9384	0.631918	0.216694	2.91617	0.00354353	0.0121161
GGT1	gamma-glutamyltransferase 1 [Source:HGNC Symbol;Acc:4250]	941.367	0.63232	0.0620352	10.1929	2.13e-24	4.02e-23
DUSP4	dual specificity phosphatase 4 [Source:HGNC Symbol;Acc:3070]	7921.59	0.632957	0.0325017	19.4746	1.8e-84	1.15e-82
STK39	serine threonine kinase 39 [Source:HGNC Symbol;Acc:17717]	33030.5	0.633148	0.0213139	29.7059	6.45e-194	1.26e-191
SLC2A12	solute carrier family 2 (facilitated glucose transporter), member 12 [Source:HGNC Symbol;Acc:18067]	1780.2	0.633202	0.0546585	11.5847	4.93e-31	1.17e-29
SWT1	SWT1 RNA endoribonuclease homolog (S. cerevisiae) [Source:HGNC Symbol;Acc:16785]	944.943	0.633912	0.0674789	9.39423	5.76e-21	9.53e-20
ZCCHC6	zinc finger, CCHC domain containing 6 [Source:HGNC Symbol;Acc:25817]	5747.98	0.634761	0.0375329	16.9121	3.66e-64	1.77e-62
KLKP1	kallikrein pseudogene 1 [Source:HGNC Symbol;Acc:21260]	470.437	0.63484	0.101535	6.25244	4.04e-10	3.48e-09
ADAMTS1	ADAM metallopeptidase with thrombospondin type 1 motif, 1 [Source:HGNC Symbol;Acc:217]	32896.4	0.635237	0.0287202	22.1181	2.12e-108	1.79e-106
GMNC	geminin coiled-coil domain containing [Source:HGNC Symbol;Acc:40049]	266.205	0.636202	0.11384	5.58857	2.29e-08	1.68e-07
ERN1	endoplasmic reticulum to nucleus signaling 1 [Source:HGNC Symbol;Acc:3449]	2314.08	0.636239	0.0579472	10.9796	4.79e-28	1.04e-26
ZG16B	zymogen granule protein 16B [Source:HGNC Symbol;Acc:30456]	3460.28	0.637334	0.0455098	14.0043	1.47e-44	4.82e-43
YIPF1	Yip1 domain family, member 1 [Source:HGNC Symbol;Acc:25231]	3653.91	0.637993	0.0413539	15.4276	1.07e-53	4.22e-52
CAMKK2	calcium/calmodulin-dependent protein kinase kinase 2, beta [Source:HGNC Symbol;Acc:1470]	11701.4	0.639131	0.0208187	30.6999	5.7e-207	1.31e-204
RLTPR	RGD motif, leucine rich repeats, tropomodulin domain and proline-rich containing [Source:HGNC Symbol;Acc:27089]	190.486	0.642493	0.123392	5.20694	1.92e-07	1.28e-06
ARSG	arylsulfatase G [Source:HGNC Symbol;Acc:24102]	1357.97	0.642716	0.0584696	10.9923	4.16e-28	9.06e-27
C2orf62	chromosome 2 open reading frame 62 [Source:HGNC Symbol;Acc:25062]	48.8514	0.642828	0.197216	3.25951	0.00111607	0.00423365
CTD-2331H12.5		155.102	0.643236	0.140938	4.56398	5.02e-06	2.76e-05
KLK4	kallikrein-related peptidase 4 [Source:HGNC Symbol;Acc:6365]	6528.99	0.64338	0.0296856	21.6731	3.68e-104	2.99e-102
AC073869.1		438.002	0.64361	0.0841145	7.6516	1.99e-14	2.36e-13
AIFM2	apoptosis-inducing factor, mitochondrion-associated, 2 [Source:HGNC Symbol;Acc:21411]	461.846	0.643735	0.0940046	6.84791	7.49e-12	7.48e-11
PCAT6	prostate cancer associated transcript 6 (non-protein coding) [Source:HGNC Symbol;Acc:43714]	797.963	0.644775	0.0796585	8.09424	5.76e-16	7.54e-15
PPM1J	protein phosphatase, Mg2+/Mn2+ dependent, 1J [Source:HGNC Symbol;Acc:20785]	173.082	0.645755	0.139053	4.64394	3.42e-06	1.93e-05
POLD4	polymerase (DNA-directed), delta 4, accessory subunit [Source:HGNC Symbol;Acc:14106]	579.388	0.645826	0.073746	8.75743	2e-18	2.93e-17
RAP1GAP	RAP1 GTPase activating protein [Source:HGNC Symbol;Acc:9858]	1958.38	0.646066	0.0501805	12.8748	6.24e-38	1.78e-36
SLC2A14	solute carrier family 2 (facilitated glucose transporter), member 14 [Source:HGNC Symbol;Acc:18301]	7.12464	0.646314	0.197529	3.27199	0.00106792	0.00407107
PACS1	phosphofurin acidic cluster sorting protein 1 [Source:HGNC Symbol;Acc:30032]	5681.54	0.646939	0.0328435	19.6977	2.26e-86	1.48e-84
PDE11A	phosphodiesterase 11A [Source:HGNC Symbol;Acc:8773]	103.557	0.647206	0.158211	4.09077	4.3e-05	0.000207258
STX19	syntaxin 19 [Source:HGNC Symbol;Acc:19300]	338.693	0.647385	0.0892506	7.25357	4.06e-13	4.44e-12
NEDD4L	neural precursor cell expressed, developmentally down-regulated 4-like, E3 ubiquitin protein ligase [Source:HGNC Symbol;Acc:7728]	15981.4	0.647545	0.0240722	26.9001	2.19e-159	3.16e-157
PTGER4	prostaglandin E receptor 4 (subtype EP4) [Source:HGNC Symbol;Acc:9596]	312.259	0.64827	0.0999059	6.48881	8.65e-11	7.86e-10
IRGM	immunity-related GTPase family, M [Source:HGNC Symbol;Acc:29597]	19.9442	0.649586	0.217551	2.9859	0.00282745	0.00990274
JAK3	Janus kinase 3 [Source:HGNC Symbol;Acc:6193]	33.5055	0.64977	0.210001	3.09413	0.00197393	0.00713966
UNC5A	unc-5 homolog A (C. elegans) [Source:HGNC Symbol;Acc:12567]	19.1511	0.651246	0.217511	2.99409	0.00275267	0.0096666
TECPR1	tectonin beta-propeller repeat containing 1 [Source:HGNC Symbol;Acc:22214]	2660.23	0.65167	0.0416572	15.6436	3.67e-55	1.48e-53
TRIP6	thyroid hormone receptor interactor 6 [Source:HGNC Symbol;Acc:12311]	77.2552	0.651927	0.180711	3.60757	0.000309082	0.00130266
RP1-90G24.6		105.044	0.65195	0.166113	3.92473	8.68e-05	0.000399318
TMC1	transmembrane channel-like 1 [Source:HGNC Symbol;Acc:16513]	27.04	0.652028	0.213129	3.05931	0.00221849	0.00795081
HIST1H2BG	histone cluster 1, H2bg [Source:HGNC Symbol;Acc:4746]	537.913	0.653438	0.0767865	8.5098	1.74e-17	2.44e-16
SLC30A4	solute carrier family 30 (zinc transporter), member 4 [Source:HGNC Symbol;Acc:11015]	23897.5	0.65408	0.0210432	31.0828	4.12e-212	1.01e-209
AC009133.17		11.6974	0.656401	0.212506	3.08886	0.00200926	0.00725568
RP11-131L12.2		49.0808	0.656995	0.191419	3.43224	0.000598615	0.00239747
COL9A2	collagen, type IX, alpha 2 [Source:HGNC Symbol;Acc:2218]	537.097	0.657117	0.0866961	7.57955	3.47e-14	4.05e-13
ELOVL2	ELOVL fatty acid elongase 2 [Source:HGNC Symbol;Acc:14416]	16.9431	0.65736	0.216528	3.03591	0.00239807	0.00852597
AC012313.1	uncharacterized protein LOC646862 [Source:RefSeq peptide;Acc:NP_001182064]	9.09755	0.657548	0.185988	3.53543	0.000407115	0.00168086
RUNX1	runt-related transcription factor 1 [Source:HGNC Symbol;Acc:10471]	41.4665	0.659833	0.204657	3.2241	0.00126371	0.00474455
FAM151A	family with sequence similarity 151, member A [Source:HGNC Symbol;Acc:25032]	16.633	0.660527	0.217502	3.03687	0.00239047	0.0085003
FBXO38	F-box protein 38 [Source:HGNC Symbol;Acc:28844]	7258.61	0.661833	0.0253871	26.0697	8.05e-150	1.04e-147
FURIN	furin (paired basic amino acid cleaving enzyme) [Source:HGNC Symbol;Acc:8568]	2557.53	0.664767	0.0451783	14.7143	5.22e-49	1.9e-47
TGFB1	transforming growth factor, beta 1 [Source:HGNC Symbol;Acc:11766]	102.549	0.664965	0.159474	4.16973	3.05e-05	0.00014999
GRIK2	glutamate receptor, ionotropic, kainate 2 [Source:HGNC Symbol;Acc:4580]	175.14	0.665461	0.131859	5.04678	4.49e-07	2.85e-06
DHCR24	24-dehydrocholesterol reductase [Source:HGNC Symbol;Acc:2859]	108161	0.667149	0.0194835	34.2418	5.78e-257	2.3e-254
PTPRM	protein tyrosine phosphatase, receptor type, M [Source:HGNC Symbol;Acc:9675]	1747.58	0.667198	0.0445946	14.9614	1.31e-50	4.9e-49
AL022344.4		11.2996	0.66804	0.213833	3.12413	0.00178333	0.00651998
CACNG4	calcium channel, voltage-dependent, gamma subunit 4 [Source:HGNC Symbol;Acc:1408]	362.357	0.668352	0.106711	6.26321	3.77e-10	3.25e-09
CTSO	cathepsin O [Source:HGNC Symbol;Acc:2542]	145.057	0.66991	0.138142	4.84942	1.24e-06	7.42e-06
RP11-465B22.3		312.406	0.670401	0.107384	6.24305	4.29e-10	3.68e-09
CRIP2	cysteine-rich protein 2 [Source:HGNC Symbol;Acc:2361]	216.29	0.671107	0.126136	5.3205	1.03e-07	7.08e-07
ZNF22	zinc finger protein 22 [Source:HGNC Symbol;Acc:13012]	32.6413	0.671418	0.21309	3.15087	0.00162783	0.00599762
APP	amyloid beta (A4) precursor protein [Source:HGNC Symbol;Acc:620]	55189.8	0.672183	0.0203121	33.0927	3.78e-240	1.21e-237
CTC-366B18.4		11.4617	0.673947	0.213236	3.16057	0.0015746	0.00581206
PGLYRP2	peptidoglycan recognition protein 2 [Source:HGNC Symbol;Acc:30013]	138.029	0.675163	0.150843	4.47594	7.61e-06	4.07e-05
KRT8P11	keratin 8 pseudogene 11 [Source:HGNC Symbol;Acc:31058]	12.0424	0.675785	0.214107	3.15629	0.0015979	0.00589418
BDNF-AS	BDNF antisense RNA [Source:HGNC Symbol;Acc:20608]	76.6584	0.67702	0.166313	4.07076	4.69e-05	0.000225066
RP11-302L19.1		55.4807	0.67835	0.190417	3.56245	0.000367405	0.00152879
MPC2	mitochondrial pyruvate carrier 2 [Source:HGNC Symbol;Acc:24515]	41107.3	0.678621	0.0236419	28.7041	3.39e-181	5.86e-179
SLC2A5	solute carrier family 2 (facilitated glucose/fructose transporter), member 5 [Source:HGNC Symbol;Acc:11010]	7.44528	0.679195	0.182297	3.72577	0.000194723	0.000849357
TRIM3	tripartite motif containing 3 [Source:HGNC Symbol;Acc:10064]	1455.96	0.679319	0.0543343	12.5026	7.23e-36	1.97e-34
GFM1	G elongation factor, mitochondrial 1 [Source:HGNC Symbol;Acc:13780]	21419.9	0.680096	0.0278628	24.4088	1.38e-131	1.49e-129
PEX10	peroxisomal biogenesis factor 10 [Source:HGNC Symbol;Acc:8851]	8296.49	0.680152	0.0305283	22.2794	5.85e-110	5.04e-108
VMAC	vimentin-type intermediate filament associated coiled-coil protein [Source:HGNC Symbol;Acc:33803]	286.221	0.68076	0.119419	5.70057	1.19e-08	9.05e-08
RABEP2	rabaptin, RAB GTPase binding effector protein 2 [Source:HGNC Symbol;Acc:24817]	2153.2	0.681848	0.0489806	13.9208	4.74e-44	1.55e-42
BPIFB1	BPI fold containing family B, member 1 [Source:HGNC Symbol;Acc:16108]	41.1362	0.682335	0.202979	3.36161	0.000774906	0.0030316
DHRS2	dehydrogenase/reductase (SDR family) member 2 [Source:HGNC Symbol;Acc:18349]	489.762	0.682519	0.0922573	7.398	1.38e-13	1.56e-12
RP11-294O2.2		65.2429	0.682997	0.181348	3.76623	0.000165732	0.000732487
CYP46A1	cytochrome P450, family 46, subfamily A, polypeptide 1 [Source:HGNC Symbol;Acc:2641]	109.551	0.683285	0.169803	4.024	5.72e-05	0.000271543
MCCC2	methylcrotonoyl-CoA carboxylase 2 (beta) [Source:HGNC Symbol;Acc:6937]	63404.9	0.68341	0.0312323	21.8815	3.9e-106	3.21e-104
MLPH	melanophilin [Source:HGNC Symbol;Acc:29643]	5778.96	0.68637	0.0322353	21.2925	1.33e-100	1.03e-98
NIPAL3	NIPA-like domain containing 3 [Source:HGNC Symbol;Acc:25233]	6352.75	0.686795	0.0308293	22.2774	6.12e-110	5.26e-108
NKAIN1	Na+/K+ transporting ATPase interacting 1 [Source:HGNC Symbol;Acc:25743]	52.7092	0.687147	0.191215	3.59359	0.000326157	0.00136786
AMOTL1	angiomotin like 1 [Source:HGNC Symbol;Acc:17811]	120.288	0.687825	0.151207	4.5489	5.39e-06	2.95e-05
GCNT2	glucosaminyl (N-acetyl) transferase 2, I-branching enzyme (I blood group) [Source:HGNC Symbol;Acc:4204]	1703.27	0.68838	0.0513287	13.4112	5.2e-41	1.58e-39
MYOF	myoferlin [Source:HGNC Symbol;Acc:3656]	45.1364	0.689829	0.196572	3.5093	0.000449288	0.0018417
C1QTNF9B-AS1	C1QTNF9B antisense RNA 1 [Source:HGNC Symbol;Acc:39839]	313.304	0.690343	0.106337	6.49201	8.47e-11	7.71e-10
CORO1B	coronin, actin binding protein, 1B [Source:HGNC Symbol;Acc:2253]	6851.65	0.691187	0.0347709	19.8783	6.27e-88	4.18e-86
LINC00844	long intergenic non-protein coding RNA 844 [Source:HGNC Symbol;Acc:45031]	21.7721	0.691718	0.216919	3.18883	0.00142851	0.00530971
RASSF3	Ras association (RalGDS/AF-6) domain family member 3 [Source:HGNC Symbol;Acc:14271]	67237.3	0.6919	0.0215253	32.1435	1.09e-226	3.11e-224
MTMR9	myotubularin related protein 9 [Source:HGNC Symbol;Acc:14596]	4267.27	0.69239	0.0353587	19.5819	2.21e-85	1.42e-83
MYBPC2	myosin binding protein C, fast type [Source:HGNC Symbol;Acc:7550]	17.3929	0.69381	0.217532	3.18946	0.00142541	0.00529906
FASN	fatty acid synthase [Source:HGNC Symbol;Acc:3594]	162122	0.69468	0.114599	6.06181	1.35e-09	1.11e-08
BEND4	BEN domain containing 4 [Source:HGNC Symbol;Acc:23815]	7680.11	0.695666	0.0367652	18.9219	7.53e-80	4.46e-78
RP1-90G24.10		143.041	0.696586	0.143475	4.85512	1.2e-06	7.22e-06
PTCH1	patched 1 [Source:HGNC Symbol;Acc:9585]	2969.22	0.696993	0.041274	16.887	5.61e-64	2.7e-62
CTD-2165H16.3		7.23631	0.699317	0.189321	3.69381	0.000220916	0.000955021
ELK4	ELK4, ETS-domain protein (SRF accessory protein 1) [Source:HGNC Symbol;Acc:3326]	13240.4	0.704654	0.0285537	24.6782	1.83e-134	2.08e-132
PCTP	phosphatidylcholine transfer protein [Source:HGNC Symbol;Acc:8752]	2657.87	0.704992	0.0433141	16.2763	1.45e-59	6.34e-58
KRT14	keratin 14 [Source:HGNC Symbol;Acc:6416]	108.524	0.70512	0.163205	4.32045	1.56e-05	8.01e-05
PRPH	peripherin [Source:HGNC Symbol;Acc:9461]	394.139	0.705465	0.0927397	7.60694	2.81e-14	3.3e-13
XKR5	XK, Kell blood group complex subunit-related family, member 5 [Source:HGNC Symbol;Acc:20782]	47.4758	0.706176	0.199457	3.54049	0.000399386	0.00165079
CCDC144CP	coiled-coil domain containing 144C, pseudogene [Source:HGNC Symbol;Acc:29073]	21.2779	0.707412	0.217225	3.25659	0.00112761	0.00427454
ANKH	ANKH inorganic pyrophosphate transport regulator [Source:HGNC Symbol;Acc:15492]	12239.1	0.707448	0.0227396	31.1109	1.72e-212	4.26e-210
HLA-DMA	major histocompatibility complex, class II, DM alpha [Source:HGNC Symbol;Acc:4934]	462.765	0.707764	0.0836238	8.46367	2.59e-17	3.59e-16
ZDHHC8P1	zinc finger, DHHC-type containing 8 pseudogene 1 [Source:HGNC Symbol;Acc:26461]	146.243	0.707779	0.147681	4.79262	1.65e-06	9.69e-06
RP11-47I22.1		6.4262	0.70788	0.187272	3.77995	0.000156857	0.00069602
KREMEN2	kringle containing transmembrane protein 2 [Source:HGNC Symbol;Acc:18797]	596.298	0.709703	0.0846627	8.38271	5.17e-17	7.09e-16
TRGJP	T cell receptor gamma joining P [Source:HGNC Symbol;Acc:12279]	18.882	0.709855	0.217569	3.26267	0.0011037	0.00419138
ST8SIA6	ST8 alpha-N-acetyl-neuraminide alpha-2,8-sialyltransferase 6 [Source:HGNC Symbol;Acc:23317]	26.4759	0.710046	0.21306	3.33261	0.00086037	0.00333395
LOXL2	lysyl oxidase-like 2 [Source:HGNC Symbol;Acc:6666]	96.1179	0.710931	0.156954	4.52955	5.91e-06	3.22e-05
RP11-422J8.1		353.312	0.71425	0.0956673	7.46597	8.27e-14	9.43e-13
KRT18	keratin 18 [Source:HGNC Symbol;Acc:6430]	33656.5	0.714902	0.022877	31.2498	2.25e-214	5.64e-212
ALOX15B	arachidonate 15-lipoxygenase, type B [Source:HGNC Symbol;Acc:434]	37.5166	0.718067	0.208223	3.44854	0.000563626	0.00226587
ATP8B3	ATPase, aminophospholipid transporter, class I, type 8B, member 3 [Source:HGNC Symbol;Acc:13535]	261.88	0.71916	0.111745	6.43575	1.23e-10	1.11e-09
CREB3L4	cAMP responsive element binding protein 3-like 4 [Source:HGNC Symbol;Acc:18854]	5111.98	0.721063	0.0443234	16.2682	1.66e-59	7.22e-58
RP11-713C5.1		1183.76	0.724701	0.0559856	12.9444	2.53e-38	7.29e-37
LINC00668	long intergenic non-protein coding RNA 668 [Source:HGNC Symbol;Acc:44328]	15.6026	0.728367	0.216454	3.365	0.000765432	0.00299781
GUCY1A3	guanylate cyclase 1, soluble, alpha 3 [Source:HGNC Symbol;Acc:4685]	8235.15	0.728713	0.0270545	26.935	8.56e-160	1.24e-157
GLUD2	glutamate dehydrogenase 2 [Source:HGNC Symbol;Acc:4336]	177.446	0.729003	0.13064	5.58027	2.4e-08	1.76e-07
LINC00930	long intergenic non-protein coding RNA 930 [Source:HGNC Symbol;Acc:48620]	28.7508	0.730275	0.211722	3.44921	0.000562221	0.00226122
NPR2	natriuretic peptide receptor B/guanylate cyclase B (atrionatriuretic peptide receptor B) [Source:HGNC Symbol;Acc:7944]	12.702	0.730362	0.207227	3.52445	0.00042436	0.00174722
PPM1A	protein phosphatase, Mg2+/Mn2+ dependent, 1A [Source:HGNC Symbol;Acc:9275]	17213.7	0.731007	0.0299745	24.3876	2.32e-131	2.47e-129
RP11-588K22.2		1251.83	0.732523	0.0606372	12.0804	1.34e-33	3.42e-32
RPGRIP1	retinitis pigmentosa GTPase regulator interacting protein 1 [Source:HGNC Symbol;Acc:13436]	55.1697	0.735376	0.184424	3.98743	6.68e-05	0.000312795
TRIM53BP	tripartite motif containing 53B, pseudogene [Source:HGNC Symbol;Acc:37144]	6.44609	0.738047	0.17677	4.17517	2.98e-05	0.000146687
TDRG1	testis development related 1 (non-protein coding) [Source:HGNC Symbol;Acc:43642]	14.3813	0.739802	0.213101	3.4716	0.000517368	0.00209804
HIST1H4E	histone cluster 1, H4e [Source:HGNC Symbol;Acc:4790]	327.43	0.739814	0.106753	6.93017	4.2e-12	4.27e-11
ARHGAP4	Rho GTPase activating protein 4 [Source:HGNC Symbol;Acc:674]	149.148	0.741289	0.148216	5.00142	5.69e-07	3.56e-06
TMC4	transmembrane channel-like 4 [Source:HGNC Symbol;Acc:22998]	1203.57	0.744469	0.063424	11.738	8.14e-32	1.97e-30
LRRC63	leucine rich repeat containing 63 [Source:HGNC Symbol;Acc:34296]	98.6296	0.744701	0.162023	4.59628	4.3e-06	2.39e-05
ABAT	4-aminobutyrate aminotransferase [Source:HGNC Symbol;Acc:23]	2971.64	0.744794	0.0371085	20.0707	1.33e-89	9.08e-88
RDH11	retinol dehydrogenase 11 (all-trans/9-cis/11-cis) [Source:HGNC Symbol;Acc:17964]	27142.9	0.745566	0.0279231	26.7007	4.62e-157	6.49e-155
GLUD1	glutamate dehydrogenase 1 [Source:HGNC Symbol;Acc:4335]	22100.6	0.74684	0.0214711	34.7836	4.31e-265	1.81e-262
RP11-766N7.3		36.9729	0.747725	0.212514	3.51847	0.000434043	0.00178314
SP9	Sp9 transcription factor [Source:HGNC Symbol;Acc:30690]	100.455	0.749513	0.156013	4.80417	1.55e-06	9.18e-06
TBC1D4	TBC1 domain family, member 4 [Source:HGNC Symbol;Acc:19165]	2776.93	0.750503	0.0488711	15.3568	3.19e-53	1.25e-51
BAIAP2	BAI1-associated protein 2 [Source:HGNC Symbol;Acc:947]	8238.19	0.750589	0.0296615	25.3052	2.8e-141	3.36e-139
AC127496.1	Uncharacterized protein [Source:UniProtKB/TrEMBL;Acc:Q9HBN7]	103.068	0.751404	0.155868	4.82078	1.43e-06	8.49e-06
HIST1H4H	histone cluster 1, H4h [Source:HGNC Symbol;Acc:4788]	4549.05	0.752411	0.0408747	18.4077	1.14e-75	6.36e-74
ADRA2A	adrenoceptor alpha 2A [Source:HGNC Symbol;Acc:281]	157.872	0.754387	0.154908	4.86992	1.12e-06	6.72e-06
CNTNAP2	contactin associated protein-like 2 [Source:HGNC Symbol;Acc:13830]	2030.29	0.755643	0.0535842	14.102	3.69e-45	1.23e-43
GADD45G	growth arrest and DNA-damage-inducible, gamma [Source:HGNC Symbol;Acc:4097]	1208.05	0.756346	0.0624732	12.1067	9.73e-34	2.49e-32
RP11-16D22.2		13.2365	0.756773	0.215009	3.51973	0.000431986	0.00177567
AC004152.6		46.1457	0.758115	0.209589	3.61716	0.000297854	0.0012591
RTBDN	retbindin [Source:HGNC Symbol;Acc:30310]	29.9178	0.760843	0.212243	3.58477	0.000337382	0.00141175
IGFBP5	insulin-like growth factor binding protein 5 [Source:HGNC Symbol;Acc:5474]	144.667	0.762072	0.149584	5.09461	3.49e-07	2.24e-06
SHC2	SHC (Src homology 2 domain containing) transforming protein 2 [Source:HGNC Symbol;Acc:29869]	97.0104	0.762365	0.15412	4.94656	7.55e-07	4.64e-06
NKX3-1	NK3 homeobox 1 [Source:HGNC Symbol;Acc:7838]	93656.8	0.763836	0.0230687	33.1113	2.04e-240	6.61e-238
LIFR-AS1	LIFR antisense RNA 1 [Source:HGNC Symbol;Acc:43600]	607.416	0.765269	0.0842258	9.08592	1.03e-19	1.62e-18
NEK5	NIMA-related kinase 5 [Source:HGNC Symbol;Acc:7748]	42.4938	0.769004	0.200583	3.83384	0.000126156	0.000567688
AL022341.3		55.4155	0.773915	0.188715	4.10097	4.11e-05	0.000198797
LGALS1	lectin, galactoside-binding, soluble, 1 [Source:HGNC Symbol;Acc:6561]	85.9999	0.775197	0.176081	4.4025	1.07e-05	5.62e-05
SNCG	synuclein, gamma (breast cancer-specific protein 1) [Source:HGNC Symbol;Acc:11141]	43.8429	0.775564	0.202564	3.82874	0.000128799	0.000578532
RP11-70P17.1		19.2255	0.776979	0.216975	3.58097	0.000342324	0.00143029
PTPRCAP	protein tyrosine phosphatase, receptor type, C-associated protein [Source:HGNC Symbol;Acc:9667]	83.8392	0.77698	0.164258	4.73026	2.24e-06	1.3e-05
AC097468.4		17.2716	0.779772	0.215979	3.6104	0.000305721	0.00129015
VSIG10L	V-set and immunoglobulin domain containing 10 like [Source:HGNC Symbol;Acc:27111]	532.624	0.781589	0.0801374	9.75311	1.79e-22	3.12e-21
HMGN2P46	high mobility group nucleosomal binding domain 2 pseudogene 46 [Source:HGNC Symbol;Acc:26817]	573.06	0.782271	0.0852103	9.18048	4.29e-20	6.86e-19
RP11-107M16.2		63.4333	0.783589	0.189107	4.14364	3.42e-05	0.000167132
KCNMA1	potassium large conductance calcium-activated channel, subfamily M, alpha member 1 [Source:HGNC Symbol;Acc:6284]	6402.22	0.783826	0.0323986	24.1932	2.62e-129	2.73e-127
ABHD2	abhydrolase domain containing 2 [Source:HGNC Symbol;Acc:18717]	109478	0.784013	0.0269529	29.0883	5.05e-186	9.17e-184
CABP4	calcium binding protein 4 [Source:HGNC Symbol;Acc:1386]	110.838	0.785845	0.168313	4.66894	3.03e-06	1.72e-05
EAF2	ELL associated factor 2 [Source:HGNC Symbol;Acc:23115]	1101.96	0.787091	0.0619628	12.7026	5.72e-37	1.6e-35
RP11-456H18.2		133.12	0.791083	0.139352	5.67687	1.37e-08	1.03e-07
KCNMB4	potassium large conductance calcium-activated channel, subfamily M, beta member 4 [Source:HGNC Symbol;Acc:6289]	127.551	0.792015	0.138497	5.71866	1.07e-08	8.17e-08
RP11-206M11.7		159.306	0.793045	0.148844	5.32801	9.93e-08	6.81e-07
MAK	male germ cell-associated kinase [Source:HGNC Symbol;Acc:6816]	677.224	0.793899	0.0717823	11.0598	1.96e-28	4.31e-27
EPS8L1	EPS8-like 1 [Source:HGNC Symbol;Acc:21295]	41.6028	0.79678	0.205591	3.87555	0.000106382	0.00048337
KLK3	kallikrein-related peptidase 3 [Source:HGNC Symbol;Acc:6364]	86437.9	0.797969	0.0157879	50.5432	0	0
VPS26B	vacuolar protein sorting 26 homolog B (S. pombe) [Source:HGNC Symbol;Acc:28119]	11455.9	0.800305	0.0324532	24.6603	2.86e-134	3.22e-132
TACSTD2	tumor-associated calcium signal transducer 2 [Source:HGNC Symbol;Acc:11530]	58.3559	0.800727	0.192333	4.16323	3.14e-05	0.000154121
APOF	apolipoprotein F [Source:HGNC Symbol;Acc:615]	137.902	0.802105	0.144072	5.5674	2.59e-08	1.89e-07
LA16c-380H5.4		10.0623	0.804896	0.203647	3.9524	7.74e-05	0.000358565
NDRG1	N-myc downstream regulated 1 [Source:HGNC Symbol;Acc:7679]	28615.9	0.805683	0.0589835	13.6595	1.77e-42	5.6e-41
C19orf38	chromosome 19 open reading frame 38 [Source:HGNC Symbol;Acc:34073]	53.5504	0.81112	0.189386	4.2829	1.84e-05	9.4e-05
RAB3B	RAB3B, member RAS oncogene family [Source:HGNC Symbol;Acc:9778]	15343.3	0.814882	0.0299708	27.1892	8.72e-163	1.29e-160
JPH4	junctophilin 4 [Source:HGNC Symbol;Acc:20156]	4.52119	0.814895	0.169753	4.80047	1.58e-06	9.34e-06
CTD-2008A1.2		895.852	0.815505	0.0649612	12.5537	3.79e-36	1.04e-34
BHLHA15	basic helix-loop-helix family, member a15 [Source:HGNC Symbol;Acc:22265]	635.343	0.817704	0.0928074	8.81076	1.24e-18	1.85e-17
HMGCS2	3-hydroxy-3-methylglutaryl-CoA synthase 2 (mitochondrial) [Source:HGNC Symbol;Acc:5008]	2393.26	0.820061	0.0509334	16.1007	2.52e-58	1.08e-56
MAPK11	mitogen-activated protein kinase 11 [Source:HGNC Symbol;Acc:6873]	657.11	0.82023	0.0788047	10.4084	2.27e-25	4.44e-24
FXYD3	FXYD domain containing ion transport regulator 3 [Source:HGNC Symbol;Acc:4027]	3441.03	0.820306	0.0398787	20.57	5.09e-94	3.65e-92
KRT8	keratin 8 [Source:HGNC Symbol;Acc:6446]	41883.7	0.820669	0.0310537	26.4274	6.64e-154	9.04e-152
AC110619.2	Uncharacterized protein [Source:UniProtKB/TrEMBL;Acc:B5MC12]	34.8624	0.822878	0.216735	3.7967	0.000146636	0.000654048
MTOR	mechanistic target of rapamycin (serine/threonine kinase) [Source:HGNC Symbol;Acc:3942]	15891.8	0.829242	0.0336893	24.6144	8.86e-134	9.94e-132
C12orf79	chromosome 12 open reading frame 79 [Source:HGNC Symbol;Acc:27409]	52.9867	0.829455	0.200078	4.14566	3.39e-05	0.000165738
PAK1IP1	PAK1 interacting protein 1 [Source:HGNC Symbol;Acc:20882]	4918.38	0.830328	0.0399384	20.7902	5.31e-96	3.91e-94
NRP1	neuropilin 1 [Source:HGNC Symbol;Acc:8004]	6710.7	0.830534	0.0294043	28.2453	1.62e-175	2.77e-173
TYMP	thymidine phosphorylase [Source:HGNC Symbol;Acc:3148]	555.98	0.832754	0.0973126	8.55751	1.15e-17	1.63e-16
RMST	rhabdomyosarcoma 2 associated transcript (non-protein coding) [Source:HGNC Symbol;Acc:29893]	9.86264	0.834593	0.196501	4.24727	2.16e-05	0.000109118
MBOAT2	membrane bound O-acyltransferase domain containing 2 [Source:HGNC Symbol;Acc:25193]	24500.5	0.834998	0.021624	38.6145	0	0
IGF1R	insulin-like growth factor 1 receptor [Source:HGNC Symbol;Acc:5465]	8806.53	0.836112	0.0668419	12.5088	6.68e-36	1.82e-34
RP11-627G23.1		137.328	0.836924	0.142493	5.87345	4.27e-09	3.39e-08
AGR2	anterior gradient 2 homolog (Xenopus laevis) [Source:HGNC Symbol;Acc:328]	625.371	0.838183	0.0866584	9.67227	3.96e-22	6.85e-21
RP11-92K15.3		129.285	0.838492	0.14168	5.91821	3.25e-09	2.61e-08
RP11-223I10.1		67.3681	0.838494	0.197283	4.25021	2.14e-05	0.00010782
AC020571.3		467.061	0.84004	0.0891679	9.42088	4.47e-21	7.43e-20
OPRL1	opiate receptor-like 1 [Source:HGNC Symbol;Acc:8155]	295.521	0.8413	0.108619	7.74544	9.53e-15	1.16e-13
ERRFI1	ERBB receptor feedback inhibitor 1 [Source:HGNC Symbol;Acc:18185]	5239.32	0.845275	0.0305754	27.6456	3.15e-168	4.88e-166
CFHR5	complement factor H-related 5 [Source:HGNC Symbol;Acc:24668]	12.2164	0.847139	0.213065	3.97597	7.01e-05	0.000327557
RP11-96H19.1		239.039	0.8482	0.108327	7.82999	4.88e-15	6.06e-14
CAPS	calcyphosine [Source:HGNC Symbol;Acc:1487]	381.472	0.849415	0.106049	8.00968	1.15e-15	1.47e-14
CA4	carbonic anhydrase IV [Source:HGNC Symbol;Acc:1375]	67.2958	0.854256	0.171459	4.98226	6.28e-07	3.91e-06
HERC3	HECT and RLD domain containing E3 ubiquitin protein ligase 3 [Source:HGNC Symbol;Acc:4876]	19528.6	0.857836	0.026711	32.1155	2.68e-226	7.58e-224
RP11-140C18.2		21.9556	0.859249	0.217191	3.9562	7.62e-05	0.000353729
SLC16A3	solute carrier family 16, member 3 (monocarboxylic acid transporter 4) [Source:HGNC Symbol;Acc:10924]	130.025	0.860191	0.144684	5.9453	2.76e-09	2.22e-08
MMEL1	membrane metallo-endopeptidase-like 1 [Source:HGNC Symbol;Acc:14668]	401.041	0.862095	0.0900709	9.57129	1.06e-21	1.8e-20
LDB3	LIM domain binding 3 [Source:HGNC Symbol;Acc:15710]	85.8366	0.869653	0.17976	4.83785	1.31e-06	7.84e-06
VSTM2L	V-set and transmembrane domain containing 2 like [Source:HGNC Symbol;Acc:16096]	54.4898	0.870574	0.194454	4.47703	7.57e-06	4.05e-05
CRISPLD2	cysteine-rich secretory protein LCCL domain containing 2 [Source:HGNC Symbol;Acc:25248]	1845.81	0.874003	0.0555343	15.7381	8.29e-56	3.4e-54
SPDEF	SAM pointed domain containing ets transcription factor [Source:HGNC Symbol;Acc:17257]	10209.6	0.874608	0.0331722	26.3657	3.39e-153	4.59e-151
RP11-18F14.2		4350.09	0.875761	0.0329293	26.5952	7.71e-156	1.07e-153
DNAH5	dynein, axonemal, heavy chain 5 [Source:HGNC Symbol;Acc:2950]	1816.03	0.877213	0.0983167	8.92233	4.57e-19	7.01e-18
CDYL2	chromodomain protein, Y-like 2 [Source:HGNC Symbol;Acc:23030]	1735.68	0.885216	0.0442245	20.0164	3.96e-89	2.69e-87
UGT2B4	UDP glucuronosyltransferase 2 family, polypeptide B4 [Source:HGNC Symbol;Acc:12553]	54.8054	0.886709	0.193188	4.58988	4.43e-06	2.46e-05
CCDC135	coiled-coil domain containing 135 [Source:HGNC Symbol;Acc:25289]	135.138	0.888609	0.155962	5.6976	1.22e-08	9.2e-08
HIST1H1E	histone cluster 1, H1e [Source:HGNC Symbol;Acc:4718]	568.64	0.889382	0.0879827	10.1086	5.06e-24	9.39e-23
FAM13A-AS1	FAM13A antisense RNA 1 [Source:HGNC Symbol;Acc:19370]	186.834	0.889565	0.131473	6.76613	1.32e-11	1.29e-10
SORD	sorbitol dehydrogenase [Source:HGNC Symbol;Acc:11184]	34760.9	0.889802	0.0267888	33.2154	6.44e-242	2.12e-239
RFPL2	ret finger protein-like 2 [Source:HGNC Symbol;Acc:9979]	282.25	0.891525	0.12092	7.37283	1.67e-13	1.87e-12
GHRHR	growth hormone releasing hormone receptor [Source:HGNC Symbol;Acc:4266]	85.1689	0.89328	0.169772	5.26165	1.43e-07	9.64e-07
ELOVL7	ELOVL fatty acid elongase 7 [Source:HGNC Symbol;Acc:26292]	20896	0.893304	0.0300936	29.6842	1.23e-193	2.38e-191
HES2	hairy and enhancer of split 2 (Drosophila) [Source:HGNC Symbol;Acc:16005]	348.721	0.895268	0.101483	8.82186	1.13e-18	1.68e-17
ANKRD37	ankyrin repeat domain 37 [Source:HGNC Symbol;Acc:29593]	1682.59	0.895678	0.0480008	18.6597	1.05e-77	6.03e-76
RP11-21L23.2		391.035	0.896448	0.0941386	9.52264	1.69e-21	2.86e-20
TSC22D3	TSC22 domain family, member 3 [Source:HGNC Symbol;Acc:3051]	3629.22	0.897701	0.0401641	22.3509	1.18e-110	1.03e-108
WWTR1	WW domain containing transcription regulator 1 [Source:HGNC Symbol;Acc:24042]	269.211	0.898139	0.121688	7.38064	1.58e-13	1.77e-12
SLC41A1	solute carrier family 41 (magnesium transporter), member 1 [Source:HGNC Symbol;Acc:19429]	11741.3	0.901693	0.0283464	31.8098	4.74e-222	1.23e-219
RP11-134K13.2		10.7986	0.901838	0.210919	4.27576	1.9e-05	9.68e-05
MME	membrane metallo-endopeptidase [Source:HGNC Symbol;Acc:7154]	46156.9	0.904965	0.0207782	43.5536	0	0
AC018865.8		96.99	0.905527	0.185031	4.89393	9.88e-07	5.98e-06
SEPP1	selenoprotein P, plasma, 1 [Source:HGNC Symbol;Acc:10751]	11141.7	0.907224	0.0258157	35.1424	1.52e-270	6.79e-268
FEV	FEV (ETS oncogene family) [Source:HGNC Symbol;Acc:18562]	22.9738	0.907941	0.216416	4.19534	2.72e-05	0.000135074
TBRG1	transforming growth factor beta regulator 1 [Source:HGNC Symbol;Acc:29551]	12037.4	0.909562	0.0267463	34.007	1.75e-253	6.64e-251
BCAS1	breast carcinoma amplified sequence 1 [Source:HGNC Symbol;Acc:974]	235.964	0.909689	0.116516	7.80741	5.84e-15	7.2e-14
ADORA2A	adenosine A2a receptor [Source:HGNC Symbol;Acc:263]	65.5207	0.909748	0.181825	5.00342	5.63e-07	3.53e-06
FOXD4	forkhead box D4 [Source:HGNC Symbol;Acc:3805]	630.55	0.915888	0.0903386	10.1384	3.73e-24	6.97e-23
TMEM92	transmembrane protein 92 [Source:HGNC Symbol;Acc:26579]	50.1038	0.915922	0.194046	4.72014	2.36e-06	1.36e-05
AC079776.7		1009.91	0.917022	0.0580569	15.7952	3.35e-56	1.39e-54
HSD17B2	hydroxysteroid (17-beta) dehydrogenase 2 [Source:HGNC Symbol;Acc:5211]	13.709	0.917774	0.210756	4.35466	1.33e-05	6.91e-05
SPARC	secreted protein, acidic, cysteine-rich (osteonectin) [Source:HGNC Symbol;Acc:11219]	154.818	0.921511	0.15222	6.05383	1.41e-09	1.16e-08
KB-1562D12.1		75.7189	0.923803	0.175552	5.26226	1.42e-07	9.61e-07
LINC00160	long intergenic non-protein coding RNA 160 [Source:HGNC Symbol;Acc:1294]	7.75318	0.927346	0.197503	4.69534	2.66e-06	1.52e-05
B2M	beta-2-microglobulin [Source:HGNC Symbol;Acc:914]	20393.1	0.928607	0.0242482	38.2959	0	0
LL22NC03-N64E9.1		309.593	0.931646	0.103347	9.01473	1.97e-19	3.06e-18
ELOVL5	ELOVL fatty acid elongase 5 [Source:HGNC Symbol;Acc:21308]	25494.5	0.937753	0.0225007	41.6766	0	0
STON1	stonin 1 [Source:HGNC Symbol;Acc:17003]	590.062	0.939122	0.0798261	11.7646	5.94e-32	1.45e-30
OR5B2	olfactory receptor, family 5, subfamily B, member 2 [Source:HGNC Symbol;Acc:8323]	132.766	0.941925	0.144337	6.52588	6.76e-11	6.21e-10
CYP2U1	cytochrome P450, family 2, subfamily U, polypeptide 1 [Source:HGNC Symbol;Acc:20582]	2831.8	0.942221	0.0496655	18.9713	2.94e-80	1.76e-78
ARHGAP28	Rho GTPase activating protein 28 [Source:HGNC Symbol;Acc:25509]	4073.29	0.943345	0.0430581	21.9087	2.15e-106	1.78e-104
TRIM53AP	tripartite motif containing 53A, pseudogene [Source:HGNC Symbol;Acc:19025]	17.3383	0.943962	0.213062	4.43045	9.4e-06	4.98e-05
AL589743.1		1698.56	0.954968	0.0549104	17.3914	9.59e-68	4.89e-66
NBL1	neuroblastoma 1, DAN family BMP antagonist [Source:HGNC Symbol;Acc:7650]	11.687	0.959473	0.210432	4.55954	5.13e-06	2.82e-05
PCDP1	Homo sapiens primary ciliary dyskinesia protein 1 (PCDP1), transcript variant 1, mRNA. [Source:RefSeq mRNA;Acc:NM_001271049]	85.619	0.959803	0.177092	5.41979	5.97e-08	4.21e-07
RLN2	relaxin 2 [Source:HGNC Symbol;Acc:10027]	230.715	0.965629	0.106672	9.05229	1.4e-19	2.18e-18
PCDH20	protocadherin 20 [Source:HGNC Symbol;Acc:14257]	1902.69	0.972033	0.0643431	15.107	1.46e-51	5.57e-50
TRGV9	T cell receptor gamma variable 9 [Source:HGNC Symbol;Acc:12295]	78.3027	0.972512	0.183212	5.30813	1.11e-07	7.55e-07
C9orf152	chromosome 9 open reading frame 152 [Source:HGNC Symbol;Acc:31455]	2201.1	0.974166	0.0465638	20.9211	3.44e-97	2.59e-95
FAXDC2	fatty acid hydroxylase domain containing 2 [Source:HGNC Symbol;Acc:1334]	238.468	0.978736	0.128922	7.59167	3.16e-14	3.7e-13
LPAR3	lysophosphatidic acid receptor 3 [Source:HGNC Symbol;Acc:14298]	10642.7	0.9801	0.0256527	38.2066	0	0
ADAM28	ADAM metallopeptidase domain 28 [Source:HGNC Symbol;Acc:206]	109.26	0.984843	0.166623	5.91061	3.41e-09	2.72e-08
ASRGL1	asparaginase like 1 [Source:HGNC Symbol;Acc:16448]	2366.89	0.985614	0.0430487	22.8953	5.17e-116	4.75e-114
CBWD1	COBW domain containing 1 [Source:HGNC Symbol;Acc:17134]	3944.15	0.990805	0.0399148	24.823	5.06e-136	5.82e-134
TMCC3	transmembrane and coiled-coil domain family 3 [Source:HGNC Symbol;Acc:29199]	768.701	0.991952	0.0690256	14.3708	7.89e-47	2.73e-45
SNCA	synuclein, alpha (non A4 component of amyloid precursor) [Source:HGNC Symbol;Acc:11138]	58.1465	0.993301	0.201385	4.93234	8.12e-07	4.98e-06
KCNN2	potassium intermediate/small conductance calcium-activated channel, subfamily N, member 2 [Source:HGNC Symbol;Acc:6291]	6973.08	0.9941	0.0290477	34.223	1.1e-256	4.31e-254
SLC15A2	solute carrier family 15 (H+/peptide transporter), member 2 [Source:HGNC Symbol;Acc:10921]	314.011	0.997802	0.112879	8.83955	9.61e-19	1.44e-17
RP11-191G24.1		22.555	1.00035	0.217286	4.60383	4.15e-06	2.31e-05
PLP1	proteolipid protein 1 [Source:HGNC Symbol;Acc:9086]	49.2156	1.00117	0.207629	4.82193	1.42e-06	8.45e-06
C1orf21	chromosome 1 open reading frame 21 [Source:HGNC Symbol;Acc:15494]	6560.2	1.00254	0.0295856	33.8861	1.07e-251	3.85e-249
ALDH1A3	aldehyde dehydrogenase 1 family, member A3 [Source:HGNC Symbol;Acc:409]	4183.35	1.00537	0.0410918	24.4665	3.36e-132	3.67e-130
AC124944.2		52.7044	1.0148	0.189723	5.34885	8.85e-08	6.12e-07
LRIG1	leucine-rich repeats and immunoglobulin-like domains 1 [Source:HGNC Symbol;Acc:17360]	7707.91	1.01629	0.0365208	27.8278	2e-170	3.19e-168
CTD-2311B13.5		60.1271	1.02183	0.1826	5.59602	2.19e-08	1.61e-07
AZGP1P1	alpha-2-glycoprotein 1, zinc-binding pseudogene 1 [Source:HGNC Symbol;Acc:911]	37.3251	1.0297	0.210574	4.88996	1.01e-06	6.1e-06
PNLIP	pancreatic lipase [Source:HGNC Symbol;Acc:9155]	22.953	1.03374	0.217001	4.76376	1.9e-06	1.11e-05
SDR9C7	short chain dehydrogenase/reductase family 9C, member 7 [Source:HGNC Symbol;Acc:29958]	70.9953	1.03733	0.18359	5.65022	1.6e-08	1.2e-07
NTNG1	netrin G1 [Source:HGNC Symbol;Acc:23319]	431.684	1.03771	0.099811	10.3968	2.56e-25	4.99e-24
WIPI1	WD repeat domain, phosphoinositide interacting 1 [Source:HGNC Symbol;Acc:25471]	900.091	1.04182	0.0617897	16.8607	8.75e-64	4.17e-62
EFCAB4B	EF-hand calcium binding domain 4B [Source:HGNC Symbol;Acc:28657]	56.1908	1.04226	0.19839	5.25357	1.49e-07	1e-06
ATP1A2	ATPase, Na+/K+ transporting, alpha 2 polypeptide [Source:HGNC Symbol;Acc:800]	16.6024	1.04454	0.212695	4.911	9.06e-07	5.52e-06
SGK1	serum/glucocorticoid regulated kinase 1 [Source:HGNC Symbol;Acc:10810]	132.895	1.05221	0.161379	6.52014	7.02e-11	6.45e-10
RP11-446N19.1		56.919	1.06072	0.185215	5.72698	1.02e-08	7.81e-08
KRT19	keratin 19 [Source:HGNC Symbol;Acc:6436]	450.944	1.06165	0.105036	10.1075	5.12e-24	9.49e-23
ELL2	elongation factor, RNA polymerase II, 2 [Source:HGNC Symbol;Acc:17064]	11859	1.0622	0.0342211	31.0393	1.59e-211	3.81e-209
LIFR	leukemia inhibitory factor receptor alpha [Source:HGNC Symbol;Acc:6597]	10231	1.06258	0.0365699	29.056	1.29e-185	2.3e-183
RP11-1060G2.1		12.3617	1.06584	0.206864	5.15238	2.57e-07	1.68e-06
SH3BGRL	SH3 domain binding glutamic acid-rich protein like [Source:HGNC Symbol;Acc:10823]	9827.09	1.0661	0.0225829	47.2081	0	0
CXCL13	chemokine (C-X-C motif) ligand 13 [Source:HGNC Symbol;Acc:10639]	42.0268	1.07546	0.208357	5.16161	2.45e-07	1.61e-06
TMEM100	transmembrane protein 100 [Source:HGNC Symbol;Acc:25607]	526.296	1.07546	0.085432	12.5885	2.44e-36	6.73e-35
RP1-288H2.2		14.8276	1.07947	0.213984	5.04461	4.54e-07	2.88e-06
TNS4	tensin 4 [Source:HGNC Symbol;Acc:24352]	368.347	1.08193	0.0941812	11.4878	1.52e-30	3.56e-29
DBI	diazepam binding inhibitor (GABA receptor modulator, acyl-CoA binding protein) [Source:HGNC Symbol;Acc:2690]	18245.2	1.0872	0.0285742	38.0484	0	0
FAM189A2	family with sequence similarity 189, member A2 [Source:HGNC Symbol;Acc:24820]	137.557	1.08943	0.14616	7.45365	9.08e-14	1.03e-12
ACSM1	acyl-CoA synthetase medium-chain family member 1 [Source:HGNC Symbol;Acc:18049]	486.746	1.0936	0.0802629	13.6252	2.84e-42	8.91e-41
LA16c-83F12.6		893.703	1.09605	0.0756801	14.4827	1.56e-47	5.49e-46
ABCC4	ATP-binding cassette, sub-family C (CFTR/MRP), member 4 [Source:HGNC Symbol;Acc:55]	50506.3	1.09683	0.0228207	48.0627	0	0
PART1	prostate androgen-regulated transcript 1 (non-protein coding) [Source:HGNC Symbol;Acc:17263]	978.576	1.10148	0.0620534	17.7505	1.71e-70	9.02e-69
RP11-65J21.4		18.8741	1.10511	0.217105	5.0902	3.58e-07	2.3e-06
FGFR3	fibroblast growth factor receptor 3 [Source:HGNC Symbol;Acc:3690]	285.198	1.11161	0.106567	10.4312	1.79e-25	3.5e-24
ACPP	acid phosphatase, prostate [Source:HGNC Symbol;Acc:125]	1323.26	1.11322	0.0792513	14.0467	8.07e-45	2.67e-43
LCP1	lymphocyte cytosolic protein 1 (L-plastin) [Source:HGNC Symbol;Acc:6528]	9892.59	1.12745	0.0264273	42.6623	0	0
AZGP1	alpha-2-glycoprotein 1, zinc-binding [Source:HGNC Symbol;Acc:910]	733.368	1.13616	0.0761542	14.9192	2.47e-50	9.16e-49
RP11-312J18.5		276.994	1.1379	0.11904	9.55894	1.19e-21	2.02e-20
AMACR	alpha-methylacyl-CoA racemase [Source:HGNC Symbol;Acc:451]	1172.82	1.14189	0.0597377	19.115	1.89e-81	1.15e-79
PLA2G4E	phospholipase A2, group IVE [Source:HGNC Symbol;Acc:24791]	86.1722	1.15668	0.180499	6.40822	1.47e-10	1.31e-09
MOGAT2	monoacylglycerol O-acyltransferase 2 [Source:HGNC Symbol;Acc:23248]	143.897	1.1722	0.146924	7.97828	1.48e-15	1.89e-14
GREB1	growth regulation by estrogen in breast cancer 1 [Source:HGNC Symbol;Acc:24885]	4123.89	1.17753	0.0489483	24.0565	7.13e-128	7.27e-126
CENPN	centromere protein N [Source:HGNC Symbol;Acc:30873]	11631.1	1.18643	0.0320408	37.0286	3.96e-300	2.33e-297
BMPR1B	bone morphogenetic protein receptor, type IB [Source:HGNC Symbol;Acc:1077]	849.399	1.19448	0.0779602	15.3216	5.48e-53	2.14e-51
CUX2	cut-like homeobox 2 [Source:HGNC Symbol;Acc:19347]	78.9159	1.19766	0.174954	6.84556	7.62e-12	7.6e-11
HGD	homogentisate 1,2-dioxygenase [Source:HGNC Symbol;Acc:4892]	2371.27	1.21336	0.0445855	27.2142	4.41e-163	6.56e-161
ARMC12	armadillo repeat containing 12 [Source:HGNC Symbol;Acc:21099]	257.012	1.21712	0.107735	11.2973	1.35e-29	3.08e-28
SLC45A2	solute carrier family 45, member 2 [Source:HGNC Symbol;Acc:16472]	37.8449	1.21906	0.20886	5.83673	5.32e-09	4.18e-08
SNAI2	snail family zinc finger 2 [Source:HGNC Symbol;Acc:11094]	315.339	1.2193	0.102934	11.8454	2.27e-32	5.65e-31
CHN2	chimerin 2 [Source:HGNC Symbol;Acc:1944]	75.9306	1.22301	0.180612	6.77146	1.27e-11	1.24e-10
TBX15	T-box 15 [Source:HGNC Symbol;Acc:11594]	249.861	1.233	0.110328	11.1758	5.36e-29	1.2e-27
CAP2	CAP, adenylate cyclase-associated protein, 2 (yeast) [Source:HGNC Symbol;Acc:20039]	3718.38	1.23875	0.0337159	36.7409	1.63e-295	9.08e-293
SMS	spermine synthase [Source:HGNC Symbol;Acc:11123]	19624.2	1.24579	0.0355179	35.0751	1.62e-269	7.08e-267
PRKCA	protein kinase C, alpha [Source:HGNC Symbol;Acc:9393]	2556.95	1.25217	0.0557695	22.4526	1.21e-111	1.06e-109
F5	coagulation factor V (proaccelerin, labile factor) [Source:HGNC Symbol;Acc:3542]	1942.29	1.25441	0.0563803	22.2491	1.15e-109	9.81e-108
SOX9	SRY (sex determining region Y)-box 9 [Source:HGNC Symbol;Acc:11204]	443.148	1.26888	0.0971623	13.0594	5.62e-39	1.65e-37
POTEH-AS1	POTEH antisense RNA 1 [Source:HGNC Symbol;Acc:40058]	40.7311	1.2707	0.204575	6.21144	5.25e-10	4.46e-09
LAMA1	laminin, alpha 1 [Source:HGNC Symbol;Acc:6481]	1163.99	1.27522	0.0722182	17.6579	8.84e-70	4.63e-68
GNMT	glycine N-methyltransferase [Source:HGNC Symbol;Acc:4415]	239.105	1.27746	0.113462	11.2589	2.09e-29	4.74e-28
PMEPA1	prostate transmembrane protein, androgen induced 1 [Source:HGNC Symbol;Acc:14107]	11602.9	1.28369	0.0350915	36.5811	5.71e-293	3.11e-290
UGT2B11	UDP glucuronosyltransferase 2 family, polypeptide B11 [Source:HGNC Symbol;Acc:12545]	9744.74	1.28448	0.0272343	47.1641	0	0
SLC6A3	solute carrier family 6 (neurotransmitter transporter, dopamine), member 3 [Source:HGNC Symbol;Acc:11049]	57.953	1.28867	0.184595	6.98104	2.93e-12	3.02e-11
AFF3	AF4/FMR2 family, member 3 [Source:HGNC Symbol;Acc:6473]	3936.73	1.28973	0.0394975	32.6535	7.15e-234	2.13e-231
CADPS2	Ca++-dependent secretion activator 2 [Source:HGNC Symbol;Acc:16018]	2691.68	1.29093	0.0457409	28.2226	3.09e-175	5.19e-173
MICAL1	microtubule associated monooxygenase, calponin and LIM domain containing 1 [Source:HGNC Symbol;Acc:20619]	1126.9	1.29494	0.0599135	21.6136	1.34e-103	1.08e-101
U3	Small nucleolar RNA U3 [Source:RFAM;Acc:RF00012]	49.9011	1.30159	0.198636	6.55263	5.65e-11	5.25e-10
RHOU	ras homolog family member U [Source:HGNC Symbol;Acc:17794]	8196.2	1.30533	0.0380222	34.3308	2.73e-258	1.11e-255
OR7E47P	olfactory receptor, family 7, subfamily E, member 47 pseudogene [Source:HGNC Symbol;Acc:8421]	100.408	1.30817	0.176375	7.41698	1.2e-13	1.36e-12
PTPN21	protein tyrosine phosphatase, non-receptor type 21 [Source:HGNC Symbol;Acc:9651]	419.568	1.3115	0.0911406	14.3898	5.99e-47	2.08e-45
NNMT	nicotinamide N-methyltransferase [Source:HGNC Symbol;Acc:7861]	95.8746	1.31202	0.162903	8.054	8.01e-16	1.04e-14
S100P	S100 calcium binding protein P [Source:HGNC Symbol;Acc:10504]	126.041	1.31457	0.143372	9.16894	4.78e-20	7.61e-19
RIMS1	regulating synaptic membrane exocytosis 1 [Source:HGNC Symbol;Acc:17282]	3330.39	1.31759	0.0442406	29.7823	6.62e-195	1.32e-192
TMEM79	transmembrane protein 79 [Source:HGNC Symbol;Acc:28196]	2295.89	1.3205	0.0454154	29.0761	7.2e-186	1.3e-183
ST6GALNAC1	ST6 (alpha-N-acetyl-neuraminyl-2,3-beta-galactosyl-1,3)-N-acetylgalactosaminide alpha-2,6-sialyltransferase 1 [Source:HGNC Symbol;Acc:23614]	3810.02	1.32308	0.0373878	35.3881	2.6e-274	1.24e-271
TUBA3E	tubulin, alpha 3e [Source:HGNC Symbol;Acc:20765]	96.6257	1.32552	0.172236	7.69596	1.4e-14	1.69e-13
ADAM7	ADAM metallopeptidase domain 7 [Source:HGNC Symbol;Acc:214]	3006.52	1.33132	0.0533346	24.9617	1.6e-137	1.85e-135
RASD1	RAS, dexamethasone-induced 1 [Source:HGNC Symbol;Acc:15828]	293.142	1.3471	0.102184	13.1831	1.1e-39	3.27e-38
RP11-303E16.2		1130.16	1.35933	0.0817203	16.634	3.96e-62	1.8e-60
LAT2	linker for activation of T cells family, member 2 [Source:HGNC Symbol;Acc:12749]	55.7696	1.35948	0.190511	7.13596	9.61e-13	1.03e-11
CTNNA2	catenin (cadherin-associated protein), alpha 2 [Source:HGNC Symbol;Acc:2510]	128.904	1.3654	0.142194	9.60233	7.82e-22	1.34e-20
RP4-655J12.4		17.7209	1.37387	0.215358	6.37946	1.78e-10	1.57e-09
PCA3	prostate cancer antigen 3 (non-protein coding) [Source:HGNC Symbol;Acc:8637]	19.7044	1.39293	0.216435	6.43581	1.23e-10	1.11e-09
TRGC2	T cell receptor gamma constant 2 [Source:HGNC Symbol;Acc:12276]	46.1725	1.39841	0.21587	6.47803	9.29e-11	8.41e-10
JAG1	jagged 1 [Source:HGNC Symbol;Acc:6188]	4957.87	1.40215	0.0388331	36.1071	1.75e-285	9.33e-283
RP11-244H18.1		93.6603	1.40754	0.164281	8.5679	1.05e-17	1.49e-16
PRDM1	PR domain containing 1, with ZNF domain [Source:HGNC Symbol;Acc:9346]	110.087	1.40845	0.15989	8.80887	1.26e-18	1.88e-17
CHRNA2	cholinergic receptor, nicotinic, alpha 2 (neuronal) [Source:HGNC Symbol;Acc:1956]	2267.09	1.41783	0.0577805	24.5382	5.78e-133	6.39e-131
TRGC1	T cell receptor gamma constant 1 [Source:HGNC Symbol;Acc:12275]	1150.92	1.41972	0.0585015	24.2681	4.25e-130	4.48e-128
SAT1	spermidine/spermine N1-acetyltransferase 1 [Source:HGNC Symbol;Acc:10540]	8108.17	1.42711	0.0307333	46.4353	0	0
LOX	lysyl oxidase [Source:HGNC Symbol;Acc:6664]	1924.14	1.43363	0.0523659	27.3772	5.12e-165	7.78e-163
SOCS2	suppressor of cytokine signaling 2 [Source:HGNC Symbol;Acc:19382]	975.87	1.43559	0.0686909	20.8992	5.45e-97	4.07e-95
DOCK8	dedicator of cytokinesis 8 [Source:HGNC Symbol;Acc:19191]	183.181	1.44289	0.129727	11.1225	9.75e-29	2.15e-27
RP11-314O13.1		169.514	1.46282	0.135473	10.7979	3.52e-27	7.38e-26
EMP1	epithelial membrane protein 1 [Source:HGNC Symbol;Acc:3333]	55.8377	1.46843	0.189577	7.74578	9.5e-15	1.16e-13
CSRP2	cysteine and glycine-rich protein 2 [Source:HGNC Symbol;Acc:2470]	19.8	1.4694	0.216826	6.77684	1.23e-11	1.2e-10
CECR6	cat eye syndrome chromosome region, candidate 6 [Source:HGNC Symbol;Acc:1844]	162.948	1.47515	0.131236	11.2404	2.58e-29	5.83e-28
TUBA3D	tubulin, alpha 3d [Source:HGNC Symbol;Acc:24071]	390.691	1.47827	0.102281	14.453	2.4e-47	8.41e-46
PPAP2A	phosphatidic acid phosphatase type 2A [Source:HGNC Symbol;Acc:9228]	12092.1	1.49963	0.0344882	43.4825	0	0
FAM105A	family with sequence similarity 105, member A [Source:HGNC Symbol;Acc:25629]	3996.78	1.50567	0.0471894	31.907	2.13e-223	5.81e-221
RFPL1S	RFPL1 antisense RNA 1 [Source:HGNC Symbol;Acc:9978]	23.693	1.51326	0.216963	6.97474	3.06e-12	3.15e-11
HHIPL2	HHIP-like 2 [Source:HGNC Symbol;Acc:25842]	36.3007	1.52485	0.209228	7.28799	3.15e-13	3.46e-12
SLC45A3	solute carrier family 45, member 3 [Source:HGNC Symbol;Acc:8642]	47239.2	1.54792	0.0241714	64.0393	0	0
INPP4B	inositol polyphosphate-4-phosphatase, type II, 105kDa [Source:HGNC Symbol;Acc:6075]	1800.26	1.55327	0.0550269	28.2275	2.69e-175	4.54e-173
AKAP12	A kinase (PRKA) anchor protein 12 [Source:HGNC Symbol;Acc:370]	4770.86	1.55443	0.0524748	29.6224	7.68e-193	1.47e-190
ACSL3	acyl-CoA synthetase long-chain family member 3 [Source:HGNC Symbol;Acc:3570]	111780	1.5704	0.023199	67.6929	0	0
TG	thyroglobulin [Source:HGNC Symbol;Acc:11764]	71.5496	1.58578	0.189823	8.35401	6.6e-17	9.01e-16
KCNH6	potassium voltage-gated channel, subfamily H (eag-related), member 6 [Source:HGNC Symbol;Acc:18862]	128.306	1.60637	0.14464	11.106	1.17e-28	2.59e-27
RLN1	relaxin 1 [Source:HGNC Symbol;Acc:10026]	2171.12	1.60785	0.0558491	28.7893	2.92e-182	5.09e-180
RP11-790I12.2		58.5462	1.62011	0.19504	8.30656	9.85e-17	1.33e-15
FKBP5	FK506 binding protein 5 [Source:HGNC Symbol;Acc:3721]	38221.6	1.62101	0.0311706	52.0045	0	0
SLC26A3	solute carrier family 26, member 3 [Source:HGNC Symbol;Acc:3018]	175.779	1.67878	0.156634	10.7178	8.39e-27	1.73e-25
RP11-790I12.1		47.1275	1.69312	0.203273	8.32929	8.13e-17	1.1e-15
SPRY4	sprouty homolog 4 (Drosophila) [Source:HGNC Symbol;Acc:15533]	95.1352	1.70725	0.180093	9.4798	2.55e-21	4.27e-20
ACADL	acyl-CoA dehydrogenase, long chain [Source:HGNC Symbol;Acc:88]	96.5622	1.71357	0.172209	9.95049	2.51e-23	4.53e-22
TMPRSS2	transmembrane protease, serine 2 [Source:HGNC Symbol;Acc:11876]	48577.6	1.72405	0.0238847	72.1822	0	0
SLC2A3	solute carrier family 2 (facilitated glucose transporter), member 3 [Source:HGNC Symbol;Acc:11007]	276.015	1.74506	0.107146	16.2868	1.22e-59	5.36e-58
MORC1	MORC family CW-type zinc finger 1 [Source:HGNC Symbol;Acc:7198]	16.7797	1.77188	0.213843	8.28589	1.17e-16	1.58e-15
SLC2A10	solute carrier family 2 (facilitated glucose transporter), member 10 [Source:HGNC Symbol;Acc:13444]	72.7609	1.77752	0.182131	9.7596	1.68e-22	2.93e-21
AKR1D1	aldo-keto reductase family 1, member D1 [Source:HGNC Symbol;Acc:388]	65.3139	1.79858	0.196222	9.16608	4.91e-20	7.81e-19
CCDC141	coiled-coil domain containing 141 [Source:HGNC Symbol;Acc:26821]	891.858	1.82217	0.0754486	24.1511	7.26e-129	7.47e-127
SLC38A4	solute carrier family 38, member 4 [Source:HGNC Symbol;Acc:14679]	598.499	1.86487	0.0933993	19.9666	1.07e-88	7.27e-87
PGC	progastricsin (pepsinogen C) [Source:HGNC Symbol;Acc:8890]	2017.95	1.86644	0.0526956	35.4194	8.59e-275	4.17e-272
SOCS2-AS1	SOCS2 antisense RNA 1 [Source:HGNC Symbol;Acc:27054]	93.589	1.8852	0.165673	11.379	5.32e-30	1.23e-28
NPPC	natriuretic peptide C [Source:HGNC Symbol;Acc:7941]	299.223	2.02781	0.118988	17.0421	4e-65	1.95e-63
ANGPT2	angiopoietin 2 [Source:HGNC Symbol;Acc:485]	623.499	2.06611	0.095102	21.7252	1.19e-104	9.66e-103
HPGD	hydroxyprostaglandin dehydrogenase 15-(NAD) [Source:HGNC Symbol;Acc:5154]	4276.78	2.12119	0.043049	49.2738	0	0
CADM2	cell adhesion molecule 2 [Source:HGNC Symbol;Acc:29849]	615.931	2.14326	0.0852997	25.1263	2.57e-139	3.02e-137
CSGALNACT1	chondroitin sulfate N-acetylgalactosaminyltransferase 1 [Source:HGNC Symbol;Acc:24290]	374.805	2.25744	0.114939	19.6403	6.99e-86	4.54e-84
UGT2B28	UDP glucuronosyltransferase 2 family, polypeptide B28 [Source:HGNC Symbol;Acc:13479]	2043.78	2.31816	0.0515606	44.9599	0	0
PDE3A	phosphodiesterase 3A, cGMP-inhibited [Source:HGNC Symbol;Acc:8778]	174.552	2.46092	0.145151	16.9542	1.79e-64	8.67e-63
TTN	titin [Source:HGNC Symbol;Acc:12403]	372.207	2.55491	0.129875	19.672	3.74e-86	2.44e-84
MYBPC1	myosin binding protein C, slow type [Source:HGNC Symbol;Acc:7549]	729.006	2.58183	0.0850135	30.3697	1.38e-202	2.96e-200
TGM2	transglutaminase 2 [Source:HGNC Symbol;Acc:11778]	114.05	2.65271	0.159529	16.6284	4.34e-62	1.97e-60
ORM2	orosomucoid 2 [Source:HGNC Symbol;Acc:8499]	110.43	2.87415	0.171401	16.7686	4.14e-63	1.95e-61
SPOCK1	sparc/osteonectin, cwcv and kazal-like domains proteoglycan (testican) 1 [Source:HGNC Symbol;Acc:11251]	426.454	3.04293	0.103171	29.4941	3.43e-191	6.44e-189
PTN	pleiotrophin [Source:HGNC Symbol;Acc:9630]	126.559	3.14593	0.170031	18.5021	1.98e-76	1.12e-74
ORM1	orosomucoid 1 [Source:HGNC Symbol;Acc:8498]	65.0021	3.16733	0.202347	15.653	3.17e-55	1.29e-53
CTB-167B5.2		127.883	4.06378	0.184944	21.973	5.22e-107	4.36e-105
STEAP4	STEAP family member 4 [Source:HGNC Symbol;Acc:21923]	2081.79	4.35938	0.111324	39.1594	0	0
