# Supplementary material for: GREB1 amplifies androgen receptor output in human prostate cancer and contributes to antiandrogen resistance
Source: eLife. 2019 Jan 15;8:e41913. doi: 10.7554/eLife.41913 (PMC6336405; doi:10.7554/eLife.41913)
Supplement: Figure 4—source data 2. [file elife-41913-fig4-data2.xlsx]

## Sheet: 5
Figure4-source data 2 : Upregulated genes in ARsig-hi shGREB1 DHT vs. veh (log2Fold change ≥ 0.6, p < 0.05)
Gene_name	Description	baseMean	log2FoldChange	lfcSE	stat	pvalue	padj
UNC5A	unc-5 homolog A (C. elegans) [Source:HGNC Symbol;Acc:12567]	19.1511	0.600865	0.21741	2.76374	0.00571437	0.0282417
DLG2	discs, large homolog 2 (Drosophila) [Source:HGNC Symbol;Acc:2901]	1117.53	0.602039	0.063014	9.55404	1.2473e-21	7.97126e-20
ORM1	orosomucoid 1 [Source:HGNC Symbol;Acc:8498]	65.0021	0.6022	0.214645	2.80556	0.00502288	0.0254502
CTD-2262B20.1		13.3363	0.603657	0.210958	2.86151	0.00421631	NA
ARMC12	armadillo repeat containing 12 [Source:HGNC Symbol;Acc:21099]	257.012	0.604033	0.116461	5.18655	2.14224e-07	3.41285e-06
CTD-2589M5.4		67.3874	0.604669	0.200333	3.01832	0.00254183	0.0143945
NKX3-1	NK3 homeobox 1 [Source:HGNC Symbol;Acc:7838]	93656.8	0.607219	0.0232772	26.0865	5.19175e-150	4.12374e-147
CTD-3064M3.3		13.7137	0.60892	0.210938	2.88672	0.00389278	NA
MCCC2	methylcrotonoyl-CoA carboxylase 2 (beta) [Source:HGNC Symbol;Acc:6937]	63404.9	0.60915	0.0314436	19.3728	1.30947e-83	3.70203e-81
FXYD3	FXYD domain containing ion transport regulator 3 [Source:HGNC Symbol;Acc:4027]	3441.03	0.609515	0.0422346	14.4317	3.27117e-47	5.45631e-45
ARHGAP28	Rho GTPase activating protein 28 [Source:HGNC Symbol;Acc:25509]	4073.29	0.612386	0.0462306	13.2463	4.73716e-40	6.69626e-38
LINC00589	long intergenic non-protein coding RNA 589 [Source:HGNC Symbol;Acc:32299]	21.6664	0.61376	0.216798	2.83102	0.00463993	0.0238797
GNMT	glycine N-methyltransferase [Source:HGNC Symbol;Acc:4415]	239.105	0.616111	0.12425	4.95863	7.09937e-07	1.01559e-05
LL22NC03-N64E9.1		309.593	0.617776	0.108017	5.71926	1.06987e-08	2.127e-07
EID3	EP300 interacting inhibitor of differentiation 3 [Source:HGNC Symbol;Acc:32961]	11.74	0.618494	0.208808	2.96202	0.00305625	NA
CNGB3	cyclic nucleotide gated channel beta 3 [Source:HGNC Symbol;Acc:2153]	223.753	0.620629	0.139024	4.46419	8.03727e-06	9.2202e-05
VSIG10L	V-set and immunoglobulin domain containing 10 like [Source:HGNC Symbol;Acc:27111]	532.624	0.624644	0.0870563	7.17518	7.22135e-13	2.40904e-11
TRPM8	transient receptor potential cation channel, subfamily M, member 8 [Source:HGNC Symbol;Acc:17961]	5018.79	0.625402	0.0444042	14.0843	4.74363e-45	7.19307e-43
IPCEF1	interaction protein for cytohesin exchange factors 1 [Source:HGNC Symbol;Acc:21204]	134.952	0.626234	0.157049	3.9875	6.67746e-05	0.000618434
IL10RB-AS1	IL10RB antisense RNA 1 (head to head) [Source:HGNC Symbol;Acc:44303]	14.7436	0.626417	0.21226	2.95118	0.00316565	NA
MBOAT2	membrane bound O-acyltransferase domain containing 2 [Source:HGNC Symbol;Acc:25193]	24500.5	0.626468	0.0224756	27.8733	5.62767e-171	6.70497e-168
IRGM	immunity-related GTPase family, M [Source:HGNC Symbol;Acc:29597]	19.9442	0.626912	0.216673	2.89335	0.00381152	0.0202407
DSC1	desmocollin 1 [Source:HGNC Symbol;Acc:3035]	454.885	0.628151	0.0963333	6.52059	7.00296e-11	1.87495e-09
ELOVL5	ELOVL fatty acid elongase 5 [Source:HGNC Symbol;Acc:21308]	25494.5	0.630212	0.0229377	27.4749	3.50333e-166	3.65222e-163
KL	klotho [Source:HGNC Symbol;Acc:6344]	16.537	0.63046	0.216273	2.91512	0.00355552	0.0190848
PGAM2	phosphoglycerate mutase 2 (muscle) [Source:HGNC Symbol;Acc:8889]	21.5716	0.640254	0.217453	2.94433	0.00323655	0.0176713
LAT2	linker for activation of T cells family, member 2 [Source:HGNC Symbol;Acc:12749]	55.7696	0.640601	0.20811	3.07819	0.00208263	0.0121846
RP11-206M11.7		159.306	0.641638	0.154858	4.14338	3.42219e-05	0.000338164
GLUD2	glutamate dehydrogenase 2 [Source:HGNC Symbol;Acc:4336]	177.446	0.645665	0.136534	4.72898	2.25653e-06	2.92455e-05
RLN1	relaxin 1 [Source:HGNC Symbol;Acc:10026]	2171.12	0.652821	0.061637	10.5914	3.26742e-26	2.57078e-24
AC016885.1	Uncharacterized protein [Source:UniProtKB/TrEMBL;Acc:M0R3B0]	44.3057	0.656274	0.202201	3.24565	0.00117183	0.00747746
LA16c-380H5.4		10.0623	0.658405	0.203105	3.2417	0.00118819	NA
TMEM79	transmembrane protein 79 [Source:HGNC Symbol;Acc:28196]	2295.89	0.658408	0.0500872	13.1452	1.81246e-39	2.4985e-37
RELN	reelin [Source:HGNC Symbol;Acc:9957]	487.526	0.658825	0.122972	5.35752	8.43712e-08	1.46138e-06
KREMEN2	kringle containing transmembrane protein 2 [Source:HGNC Symbol;Acc:18797]	596.298	0.660245	0.0927795	7.11628	1.10881e-12	3.61938e-11
DUSP4	dual specificity phosphatase 4 [Source:HGNC Symbol;Acc:3070]	7921.59	0.663837	0.0319581	20.7721	7.73933e-96	2.86871e-93
NNT	nicotinamide nucleotide transhydrogenase [Source:HGNC Symbol;Acc:7863]	40.6064	0.664734	0.201607	3.29718	0.000976615	0.00637322
PKP1	plakophilin 1 (ectodermal dysplasia/skin fragility syndrome) [Source:HGNC Symbol;Acc:9023]	215.035	0.670148	0.141855	4.72418	2.31051e-06	2.98292e-05
PLA2G5	phospholipase A2, group V [Source:HGNC Symbol;Acc:9038]	157.713	0.671306	0.157744	4.25566	2.08437e-05	0.000217025
CENPN	centromere protein N [Source:HGNC Symbol;Acc:30873]	11631.1	0.679701	0.0339391	20.0271	3.19918e-89	1.04632e-86
ACSM1	acyl-CoA synthetase medium-chain family member 1 [Source:HGNC Symbol;Acc:18049]	486.746	0.681447	0.0912383	7.46888	8.08831e-14	2.88276e-12
TMTC1	transmembrane and tetratricopeptide repeat containing 1 [Source:HGNC Symbol;Acc:24099]	340.944	0.683781	0.0954771	7.16173	7.9666e-13	2.64181e-11
FGFR3	fibroblast growth factor receptor 3 [Source:HGNC Symbol;Acc:3690]	285.198	0.684844	0.120136	5.70056	1.19414e-08	2.35884e-07
AKR1D1	aldo-keto reductase family 1, member D1 [Source:HGNC Symbol;Acc:388]	65.3139	0.686409	0.198593	3.45637	0.00054751	0.00386805
LINC00668	long intergenic non-protein coding RNA 668 [Source:HGNC Symbol;Acc:44328]	15.6026	0.687033	0.214256	3.2066	0.00134312	0.0084191
RP11-191G24.1		22.555	0.690693	0.21612	3.19587	0.00139408	0.00868954
RP1-46F2.3		32.0218	0.697161	0.212837	3.27557	0.0010545	0.00681216
OR5B2	olfactory receptor, family 5, subfamily B, member 2 [Source:HGNC Symbol;Acc:8323]	132.766	0.698556	0.150698	4.63546	3.5615e-06	4.43658e-05
FAM189A2	family with sequence similarity 189, member A2 [Source:HGNC Symbol;Acc:24820]	137.557	0.718484	0.158793	4.52465	6.04946e-06	7.14624e-05
KCNH6	potassium voltage-gated channel, subfamily H (eag-related), member 6 [Source:HGNC Symbol;Acc:18862]	128.306	0.720134	0.153645	4.687	2.77238e-06	3.53272e-05
HGD	homogentisate 1,2-dioxygenase [Source:HGNC Symbol;Acc:4892]	2371.27	0.722976	0.0501685	14.4109	4.41662e-47	7.15235e-45
RP11-107M16.2		63.4333	0.723423	0.206659	3.50057	0.000464266	0.00335672
HIST1H1E	histone cluster 1, H1e [Source:HGNC Symbol;Acc:4718]	568.64	0.725766	0.0943653	7.69103	1.45957e-14	5.5331e-13
PCDH20	protocadherin 20 [Source:HGNC Symbol;Acc:14257]	1902.69	0.726213	0.0614263	11.8225	2.98657e-32	3.29907e-30
DHRS2	dehydrogenase/reductase (SDR family) member 2 [Source:HGNC Symbol;Acc:18349]	489.762	0.729904	0.0893944	8.16499	3.2146e-16	1.37486e-14
ABCC4	ATP-binding cassette, sub-family C (CFTR/MRP), member 4 [Source:HGNC Symbol;Acc:55]	50506.3	0.731924	0.0232646	31.4609	2.97676e-217	6.20655e-214
PCDP1	Homo sapiens primary ciliary dyskinesia protein 1 (PCDP1), transcript variant 1, mRNA. [Source:RefSeq mRNA;Acc:NM_001271049]	85.619	0.734643	0.178014	4.12689	3.67701e-05	0.000359722
KCNN2	potassium intermediate/small conductance calcium-activated channel, subfamily N, member 2 [Source:HGNC Symbol;Acc:6291]	6973.08	0.735271	0.0323289	22.7435	1.66603e-114	8.42102e-112
HHIPL2	HHIP-like 2 [Source:HGNC Symbol;Acc:25842]	36.3007	0.736595	0.214888	3.4278	0.000608486	0.00423957
DNAH5	dynein, axonemal, heavy chain 5 [Source:HGNC Symbol;Acc:2950]	1816.03	0.738015	0.100496	7.34371	2.07758e-13	7.23465e-12
NRP1	neuropilin 1 [Source:HGNC Symbol;Acc:8004]	6710.7	0.743071	0.0312475	23.7801	5.36044e-125	2.9804e-122
PTPN21	protein tyrosine phosphatase, non-receptor type 21 [Source:HGNC Symbol;Acc:9651]	419.568	0.743247	0.108804	6.8311	8.42686e-12	2.519e-10
POTEH-AS1	POTEH antisense RNA 1 [Source:HGNC Symbol;Acc:40058]	40.7311	0.74403	0.213954	3.47752	0.000506072	0.00361511
MPC2	mitochondrial pyruvate carrier 2 [Source:HGNC Symbol;Acc:24515]	41107.3	0.74777	0.0238981	31.2899	6.39356e-215	1.18494e-211
ELOVL7	ELOVL fatty acid elongase 7 [Source:HGNC Symbol;Acc:26292]	20896	0.757327	0.0312091	24.2662	4.45597e-130	2.7528e-127
GJC3	gap junction protein, gamma 3, 30.2kDa [Source:HGNC Symbol;Acc:17495]	22.8904	0.764866	0.217415	3.518	0.00043482	0.00317445
HERC3	HECT and RLD domain containing E3 ubiquitin protein ligase 3 [Source:HGNC Symbol;Acc:4876]	19528.6	0.767292	0.0279093	27.4923	2.16746e-166	2.41021e-163
TUBB1	tubulin, beta 1 class VI [Source:HGNC Symbol;Acc:16257]	25.8994	0.7678	0.216952	3.53904	0.000401586	0.00295477
RHOU	ras homolog family member U [Source:HGNC Symbol;Acc:17794]	8196.2	0.76873	0.0399809	19.2274	2.18109e-82	5.86782e-80
BCAS1	breast carcinoma amplified sequence 1 [Source:HGNC Symbol;Acc:974]	235.964	0.774045	0.124287	6.22789	4.72768e-10	1.13956e-08
FAM13A-AS1	FAM13A antisense RNA 1 [Source:HGNC Symbol;Acc:19370]	186.834	0.778453	0.14396	5.40741	6.39413e-08	1.13704e-06
DBI	diazepam binding inhibitor (GABA receptor modulator, acyl-CoA binding protein) [Source:HGNC Symbol;Acc:2690]	18245.2	0.779734	0.0292421	26.6648	1.20669e-156	1.05935e-153
PRR16	proline rich 16 [Source:HGNC Symbol;Acc:29654]	261.083	0.788651	0.121191	6.50753	7.63978e-11	2.0324e-09
UNC93A	unc-93 homolog A (C. elegans) [Source:HGNC Symbol;Acc:12570]	21.3316	0.794602	0.21725	3.65755	0.000254642	0.00198107
ADRA2A	adrenoceptor alpha 2A [Source:HGNC Symbol;Acc:281]	157.872	0.794748	0.165633	4.79824	1.60069e-06	2.14282e-05
DOCK11	dedicator of cytokinesis 11 [Source:HGNC Symbol;Acc:23483]	90.7391	0.795421	0.178281	4.46161	8.13478e-06	9.31284e-05
OR7E47P	olfactory receptor, family 7, subfamily E, member 47 pseudogene [Source:HGNC Symbol;Acc:8421]	100.408	0.798033	0.184569	4.32377	1.53385e-05	0.000164109
DOCK8	dedicator of cytokinesis 8 [Source:HGNC Symbol;Acc:19191]	183.181	0.798308	0.15514	5.14573	2.66484e-07	4.17758e-06
LOX	lysyl oxidase [Source:HGNC Symbol;Acc:6664]	1924.14	0.799573	0.0605104	13.2138	7.30389e-40	1.02377e-37
TENM1	teneurin transmembrane protein 1 [Source:HGNC Symbol;Acc:8117]	3187.26	0.800102	0.0574027	13.9384	3.70216e-44	5.51357e-42
TBX15	T-box 15 [Source:HGNC Symbol;Acc:11594]	249.861	0.806824	0.133825	6.02894	1.65036e-09	3.68515e-08
ELL2	elongation factor, RNA polymerase II, 2 [Source:HGNC Symbol;Acc:17064]	11859	0.807161	0.0354453	22.772	8.68436e-115	4.52672e-112
SLC45A3	solute carrier family 45, member 3 [Source:HGNC Symbol;Acc:8642]	47239.2	0.811387	0.0247115	32.8344	1.90346e-236	7.93741e-233
GHRHR	growth hormone releasing hormone receptor [Source:HGNC Symbol;Acc:4266]	85.1689	0.813953	0.188356	4.32136	1.55073e-05	0.000165596
AFF3	AF4/FMR2 family, member 3 [Source:HGNC Symbol;Acc:6473]	3936.73	0.814516	0.0423074	19.2523	1.34921e-82	3.7508e-80
VSTM2L	V-set and transmembrane domain containing 2 like [Source:HGNC Symbol;Acc:16096]	54.4898	0.817546	0.207203	3.94563	7.95912e-05	0.000723083
ANGPT2	angiopoietin 2 [Source:HGNC Symbol;Acc:485]	623.499	0.821758	0.107689	7.63086	2.33197e-14	8.74095e-13
CTNNA2	catenin (cadherin-associated protein), alpha 2 [Source:HGNC Symbol;Acc:2510]	128.904	0.822332	0.155181	5.29917	1.1633e-07	1.94622e-06
BMPR1B	bone morphogenetic protein receptor, type IB [Source:HGNC Symbol;Acc:1077]	849.399	0.825329	0.0953028	8.66007	4.71462e-18	2.39756e-16
SPARC	secreted protein, acidic, cysteine-rich (osteonectin) [Source:HGNC Symbol;Acc:11219]	154.818	0.826218	0.159884	5.1676	2.37118e-07	3.74539e-06
LA16c-83F12.6		893.703	0.828975	0.0809986	10.2344	1.39007e-24	1.03051e-22
SLC2A3	solute carrier family 2 (facilitated glucose transporter), member 3 [Source:HGNC Symbol;Acc:11007]	276.015	0.841031	0.135893	6.18894	6.05713e-10	1.44127e-08
U3	Small nucleolar RNA U3 [Source:RFAM;Acc:RF00012]	49.9011	0.846881	0.204163	4.14806	3.35303e-05	0.000332117
SLC15A2	solute carrier family 15 (H+/peptide transporter), member 2 [Source:HGNC Symbol;Acc:10921]	314.011	0.849342	0.121458	6.99288	2.693e-12	8.50744e-11
SAT1	spermidine/spermine N1-acetyltransferase 1 [Source:HGNC Symbol;Acc:10540]	8108.17	0.852072	0.0323145	26.3681	3.18537e-153	2.6566e-150
S100P	S100 calcium binding protein P [Source:HGNC Symbol;Acc:10504]	126.041	0.860282	0.148578	5.79011	7.03389e-09	1.43957e-07
AZGP1P1	alpha-2-glycoprotein 1, zinc-binding pseudogene 1 [Source:HGNC Symbol;Acc:911]	37.3251	0.868251	0.213154	4.07335	4.63427e-05	0.000446045
PMEPA1	prostate transmembrane protein, androgen induced 1 [Source:HGNC Symbol;Acc:14107]	11602.9	0.869347	0.0363413	23.9218	1.81779e-126	1.08289e-123
NNMT	nicotinamide N-methyltransferase [Source:HGNC Symbol;Acc:7861]	95.8746	0.870107	0.169609	5.13009	2.89608e-07	4.50622e-06
TNS4	tensin 4 [Source:HGNC Symbol;Acc:24352]	368.347	0.876091	0.111863	7.83184	4.80764e-15	1.90932e-13
OR5B12	olfactory receptor, family 5, subfamily B, member 12 [Source:HGNC Symbol;Acc:15432]	59.3508	0.878037	0.187762	4.67633	2.9205e-06	3.70167e-05
MOGAT2	monoacylglycerol O-acyltransferase 2 [Source:HGNC Symbol;Acc:23248]	143.897	0.883772	0.157485	5.6118	2.00228e-08	3.82567e-07
JAG1	jagged 1 [Source:HGNC Symbol;Acc:6188]	4957.87	0.887371	0.0412953	21.4884	1.99798e-102	8.12838e-100
LCP1	lymphocyte cytosolic protein 1 (L-plastin) [Source:HGNC Symbol;Acc:6528]	9892.59	0.88895	0.0291558	30.4897	3.57e-204	5.41342e-201
RP11-303E16.2		1130.16	0.89065	0.09105	9.782	1.34529e-22	9.08478e-21
CSRP2	cysteine and glycine-rich protein 2 [Source:HGNC Symbol;Acc:2470]	19.8	0.906462	0.215932	4.19791	2.69388e-05	0.000272658
TUBA3E	tubulin, alpha 3e [Source:HGNC Symbol;Acc:20765]	96.6257	0.906806	0.180825	5.01482	5.30837e-07	7.80808e-06
CUX2	cut-like homeobox 2 [Source:HGNC Symbol;Acc:19347]	78.9159	0.927497	0.185093	5.01099	5.41508e-07	7.93007e-06
KRT14	keratin 14 [Source:HGNC Symbol;Acc:6416]	108.524	0.930093	0.181882	5.11372	3.15876e-07	4.86502e-06
FKBP5	FK506 binding protein 5 [Source:HGNC Symbol;Acc:3721]	38221.6	0.930236	0.032004	29.0662	9.60142e-186	1.23194e-182
TACSTD2	tumor-associated calcium signal transducer 2 [Source:HGNC Symbol;Acc:11530]	58.3559	0.936626	0.200618	4.6687	3.03111e-06	3.81576e-05
FEV	FEV (ETS oncogene family) [Source:HGNC Symbol;Acc:18562]	22.9738	0.942613	0.217104	4.34175	1.41351e-05	0.000152901
AZGP1	alpha-2-glycoprotein 1, zinc-binding [Source:HGNC Symbol;Acc:910]	733.368	0.962738	0.0768934	12.5204	5.77296e-36	6.97775e-34
WWTR1	WW domain containing transcription regulator 1 [Source:HGNC Symbol;Acc:24042]	269.211	0.96737	0.131163	7.37535	1.63919e-13	5.73202e-12
SDR9C7	short chain dehydrogenase/reductase family 9C, member 7 [Source:HGNC Symbol;Acc:29958]	70.9953	0.985922	0.198656	4.96296	6.94281e-07	9.94897e-06
SOCS2-AS1	SOCS2 antisense RNA 1 [Source:HGNC Symbol;Acc:27054]	93.589	0.989009	0.183707	5.38363	7.29991e-08	1.27902e-06
ADH1C	alcohol dehydrogenase 1C (class I), gamma polypeptide [Source:HGNC Symbol;Acc:251]	492.286	1.00895	0.090556	11.1417	7.85698e-29	7.24058e-27
SLC26A3	solute carrier family 26, member 3 [Source:HGNC Symbol;Acc:3018]	175.779	1.01128	0.189565	5.33473	9.56852e-08	1.63354e-06
CXCL13	chemokine (C-X-C motif) ligand 13 [Source:HGNC Symbol;Acc:10639]	42.0268	1.0153	0.21294	4.768	1.86068e-06	2.45734e-05
ASRGL1	asparaginase like 1 [Source:HGNC Symbol;Acc:16448]	2366.89	1.01937	0.0495716	20.5635	5.82646e-94	2.06777e-91
SOCS2	suppressor of cytokine signaling 2 [Source:HGNC Symbol;Acc:19382]	975.87	1.02375	0.0793723	12.8981	4.61307e-38	5.87374e-36
ADAM28	ADAM metallopeptidase domain 28 [Source:HGNC Symbol;Acc:206]	109.26	1.0319	0.16875	6.115	9.65574e-10	2.20627e-08
RP11-244H18.1		93.6603	1.04018	0.180027	5.77789	7.56412e-09	1.54053e-07
FAM105A	family with sequence similarity 105, member A [Source:HGNC Symbol;Acc:25629]	3996.78	1.04266	0.0526713	19.7955	3.25462e-87	1.02428e-84
ACSL3	acyl-CoA synthetase long-chain family member 3 [Source:HGNC Symbol;Acc:3570]	111780	1.0434	0.0234969	44.4056	0	0
LAMA1	laminin, alpha 1 [Source:HGNC Symbol;Acc:6481]	1163.99	1.0826	0.0744167	14.5479	6.02663e-48	1.03633e-45
TMEM100	transmembrane protein 100 [Source:HGNC Symbol;Acc:25607]	526.296	1.08877	0.0918267	11.8568	1.98435e-32	2.2066e-30
ORM2	orosomucoid 2 [Source:HGNC Symbol;Acc:8499]	110.43	1.09227	0.200261	5.45421	4.91911e-08	8.91855e-07
TMPRSS2	transmembrane protease, serine 2 [Source:HGNC Symbol;Acc:11876]	48577.6	1.09471	0.0250493	43.7023	0	0
KRT19	keratin 19 [Source:HGNC Symbol;Acc:6436]	450.944	1.10778	0.129309	8.56692	1.06289e-17	5.26081e-16
RP11-314O13.1		169.514	1.11126	0.156506	7.10042	1.24379e-12	4.02035e-11
UGT2B28	UDP glucuronosyltransferase 2 family, polypeptide B28 [Source:HGNC Symbol;Acc:13479]	2043.78	1.12675	0.0510457	22.0734	5.6961e-108	2.7146e-105
AKAP12	A kinase (PRKA) anchor protein 12 [Source:HGNC Symbol;Acc:370]	4770.86	1.13188	0.058356	19.3961	8.32136e-84	2.39311e-81
PLA2G4E	phospholipase A2, group IVE [Source:HGNC Symbol;Acc:24791]	86.1722	1.13457	0.193346	5.86805	4.40946e-09	9.22301e-08
INPP4B	inositol polyphosphate-4-phosphatase, type II, 105kDa [Source:HGNC Symbol;Acc:6075]	1800.26	1.1542	0.0652559	17.6874	5.24664e-70	1.26832e-67
SLC38A4	solute carrier family 38, member 4 [Source:HGNC Symbol;Acc:14679]	598.499	1.20093	0.112227	10.7009	1.00827e-26	8.20387e-25
ADAM7	ADAM metallopeptidase domain 7 [Source:HGNC Symbol;Acc:214]	3006.52	1.21679	0.0560456	21.7107	1.62522e-104	6.95094e-102
TGM2	transglutaminase 2 [Source:HGNC Symbol;Acc:11778]	114.05	1.2288	0.183264	6.70509	2.01284e-11	5.84916e-10
ST6GALNAC1	ST6 (alpha-N-acetyl-neuraminyl-2,3-beta-galactosyl-1,3)-N-acetylgalactosaminide alpha-2,6-sialyltransferase 1 [Source:HGNC Symbol;Acc:23614]	3810.02	1.26064	0.039953	31.5529	1.63448e-218	3.89472e-215
CHRNA2	cholinergic receptor, nicotinic, alpha 2 (neuronal) [Source:HGNC Symbol;Acc:1956]	2267.09	1.26813	0.0649426	19.5269	6.48826e-85	1.93257e-82
ACADL	acyl-CoA dehydrogenase, long chain [Source:HGNC Symbol;Acc:88]	96.5622	1.28032	0.180228	7.10388	1.21301e-12	3.94405e-11
F5	coagulation factor V (proaccelerin, labile factor) [Source:HGNC Symbol;Acc:3542]	1942.29	1.29154	0.062188	20.7682	8.38644e-96	3.041e-93
TUBA3D	tubulin, alpha 3d [Source:HGNC Symbol;Acc:24071]	390.691	1.3189	0.112964	11.6754	1.70305e-31	1.7866e-29
CSGALNACT1	chondroitin sulfate N-acetylgalactosaminyltransferase 1 [Source:HGNC Symbol;Acc:24290]	374.805	1.3578	0.130078	10.4384	1.65579e-25	1.26112e-23
CCDC141	coiled-coil domain containing 141 [Source:HGNC Symbol;Acc:26821]	891.858	1.39506	0.0902577	15.4565	6.82526e-54	1.32378e-51
PTN	pleiotrophin [Source:HGNC Symbol;Acc:9630]	126.559	1.42531	0.181744	7.84243	4.41921e-15	1.75925e-13
TRGC1	T cell receptor gamma constant 1 [Source:HGNC Symbol;Acc:12275]	1150.92	1.45909	0.0795463	18.3427	3.77823e-75	9.54861e-73
SLC2A10	solute carrier family 2 (facilitated glucose transporter), member 10 [Source:HGNC Symbol;Acc:13444]	72.7609	1.49066	0.197583	7.54445	4.54204e-14	1.65057e-12
SPRY4	sprouty homolog 4 (Drosophila) [Source:HGNC Symbol;Acc:15533]	95.1352	1.49937	0.173544	8.63975	5.63337e-18	2.85607e-16
CTB-167B5.2		127.883	1.51281	0.203229	7.44387	9.77799e-14	3.47754e-12
PDE3A	phosphodiesterase 3A, cGMP-inhibited [Source:HGNC Symbol;Acc:8778]	174.552	1.56174	0.144336	10.8202	2.76124e-27	2.33795e-25
TTN	titin [Source:HGNC Symbol;Acc:12403]	372.207	1.59008	0.145177	10.9527	6.4519e-28	5.66409e-26
HPGD	hydroxyprostaglandin dehydrogenase 15-(NAD) [Source:HGNC Symbol;Acc:5154]	4276.78	1.73734	0.0570604	30.4473	1.3002e-203	1.80728e-200
CADM2	cell adhesion molecule 2 [Source:HGNC Symbol;Acc:29849]	615.931	1.84128	0.0956612	19.2479	1.47015e-82	4.02001e-80
NPPC	natriuretic peptide C [Source:HGNC Symbol;Acc:7941]	299.223	1.88107	0.123417	15.2415	1.8743e-52	3.4737e-50
PGC	progastricsin (pepsinogen C) [Source:HGNC Symbol;Acc:8890]	2017.95	1.99862	0.0649857	30.7548	1.05404e-207	1.75814e-204
MYBPC1	myosin binding protein C, slow type [Source:HGNC Symbol;Acc:7549]	729.006	2.17591	0.0840454	25.8897	8.69745e-148	6.59425e-145
STEAP4	STEAP family member 4 [Source:HGNC Symbol;Acc:21923]	2081.79	2.43908	0.130062	18.7532	1.82306e-78	4.75134e-76
SPOCK1	sparc/osteonectin, cwcv and kazal-like domains proteoglycan (testican) 1 [Source:HGNC Symbol;Acc:11251]	426.454	2.47099	0.116109	21.2817	1.67761e-100	6.50756e-98
