# Supplementary material for: GREB1 amplifies androgen receptor output in human prostate cancer and contributes to antiandrogen resistance
Source: eLife. 2019 Jan 15;8:e41913. doi: 10.7554/eLife.41913 (PMC6336405; doi:10.7554/eLife.41913)
Supplement: Figure 4—source data 3. [file elife-41913-fig4-data3.xlsx]

## Sheet: 6
Figure4-source data 3 : GSEA Results (ARsig-hi shRenilla DHT vs. shGREB1 DHT)
Top 100 gene sets enriched in ARsig-hi shRenilla compared to shGREB1
NAME	GS<br> follow link to MSigDB	GS DETAILS	SIZE	ES	NES	NOM p-val	FDR q-val	FWER p-val	RANK AT MAX	LEADING EDGE
NELSON_RESPONSE_TO_ANDROGEN_UP	NELSON_RESPONSE_TO_ANDROGEN_UP	Details ...	85	0.805165	2.93609	0	0	0	2002	tags=65%, list=10%, signal=71%
MENSE_HYPOXIA_UP	MENSE_HYPOXIA_UP	Details ...	95	0.681861	2.50447	0	0	0	3254	tags=57%, list=16%, signal=67%
WANG_RESPONSE_TO_ANDROGEN_UP	WANG_RESPONSE_TO_ANDROGEN_UP	Details ...	28	0.774517	2.25683	0	0.000716288	0.002	1204	tags=50%, list=6%, signal=53%
ELVIDGE_HIF1A_AND_HIF2A_TARGETS_DN	ELVIDGE_HIF1A_AND_HIF2A_TARGETS_DN	Details ...	101	0.590906	2.22995	0	0.000537216	0.002	4227	tags=61%, list=21%, signal=77%
ELVIDGE_HIF1A_TARGETS_DN	ELVIDGE_HIF1A_TARGETS_DN	Details ...	88	0.593257	2.18639	0	0.000862148	0.004	4204	tags=64%, list=21%, signal=80%
LEONARD_HYPOXIA	LEONARD_HYPOXIA	Details ...	46	0.670384	2.18163	0	0.000900816	0.005	3041	tags=52%, list=15%, signal=61%
ONDER_CDH1_TARGETS_3_UP	ONDER_CDH1_TARGETS_3_UP	Details ...	17	0.822158	2.14954	0	0.00107016	0.007	2266	tags=65%, list=11%, signal=73%
FARDIN_HYPOXIA_11	FARDIN_HYPOXIA_11	Details ...	32	0.710989	2.13979	0	0.00107433	0.008	4259	tags=84%, list=21%, signal=106%
QI_HYPOXIA	QI_HYPOXIA	Details ...	134	0.534503	2.09176	0	0.00296846	0.025	4938	tags=51%, list=24%, signal=67%
ELVIDGE_HYPOXIA_UP	ELVIDGE_HYPOXIA_UP	Details ...	164	0.517591	2.07845	0	0.00309504	0.029	4323	tags=55%, list=21%, signal=69%
WANG_RESPONSE_TO_FORSKOLIN_UP	WANG_RESPONSE_TO_FORSKOLIN_UP	Details ...	23	0.738861	2.07763	0	0.00300437	0.031	1164	tags=43%, list=6%, signal=46%
ELVIDGE_HYPOXIA_BY_DMOG_UP	ELVIDGE_HYPOXIA_BY_DMOG_UP	Details ...	126	0.53865	2.0756	0	0.00284336	0.032	3041	tags=46%, list=15%, signal=54%
LIU_PROSTATE_CANCER_UP	LIU_PROSTATE_CANCER_UP	Details ...	91	0.550689	2.03572	0	0.00598805	0.069	2197	tags=35%, list=11%, signal=39%
RODRIGUES_DCC_TARGETS_DN	RODRIGUES_DCC_TARGETS_DN	Details ...	120	0.520318	1.99968	0	0.00907899	0.108	4429	tags=51%, list=22%, signal=65%
LEE_NAIVE_T_LYMPHOCYTE	LEE_NAIVE_T_LYMPHOCYTE	Details ...	16	0.768703	1.97216	0	0.0130762	0.166	1564	tags=31%, list=8%, signal=34%
HOOI_ST7_TARGETS_DN	HOOI_ST7_TARGETS_DN	Details ...	114	0.509671	1.96166	0	0.0147257	0.187	1938	tags=33%, list=9%, signal=37%
LEE_DOUBLE_POLAR_THYMOCYTE	LEE_DOUBLE_POLAR_THYMOCYTE	Details ...	21	0.708819	1.95711	0	0.0147307	0.197	3265	tags=48%, list=16%, signal=57%
UZONYI_RESPONSE_TO_LEUKOTRIENE_AND_THROMBIN	UZONYI_RESPONSE_TO_LEUKOTRIENE_AND_THROMBIN	Details ...	36	0.622998	1.93977	0	0.0189436	0.262	3678	tags=47%, list=18%, signal=58%
DOANE_RESPONSE_TO_ANDROGEN_UP	DOANE_RESPONSE_TO_ANDROGEN_UP	Details ...	172	0.47748	1.93518	0	0.0186819	0.27	3605	tags=38%, list=18%, signal=46%
MANALO_HYPOXIA_UP	MANALO_HYPOXIA_UP	Details ...	195	0.460758	1.90838	0	0.0270299	0.384	4564	tags=47%, list=22%, signal=60%
YAO_TEMPORAL_RESPONSE_TO_PROGESTERONE_CLUSTER_1	YAO_TEMPORAL_RESPONSE_TO_PROGESTERONE_CLUSTER_1		61	0.562142	1.90259	0	0.027821	0.404	2182	tags=34%, list=11%, signal=38%
VANTVEER_BREAST_CANCER_ESR1_UP	VANTVEER_BREAST_CANCER_ESR1_UP		161	0.477415	1.90005	0	0.0274322	0.415	3964	tags=35%, list=19%, signal=43%
BHAT_ESR1_TARGETS_NOT_VIA_AKT1_DN	BHAT_ESR1_TARGETS_NOT_VIA_AKT1_DN		83	0.518528	1.89656	0	0.0272576	0.434	3133	tags=41%, list=15%, signal=48%
CREIGHTON_ENDOCRINE_THERAPY_RESISTANCE_5	CREIGHTON_ENDOCRINE_THERAPY_RESISTANCE_5		436	0.422747	1.89601	0	0.0263455	0.438	5444	tags=47%, list=27%, signal=63%
ONDER_CDH1_TARGETS_1_UP	ONDER_CDH1_TARGETS_1_UP		135	0.482211	1.88643	0	0.0289958	0.482	3072	tags=33%, list=15%, signal=38%
AMUNDSON_POOR_SURVIVAL_AFTER_GAMMA_RADIATION_8G	AMUNDSON_POOR_SURVIVAL_AFTER_GAMMA_RADIATION_8G		90	0.509625	1.88525	0	0.0284141	0.491	3168	tags=32%, list=16%, signal=38%
SHEDDEN_LUNG_CANCER_GOOD_SURVIVAL_A4	SHEDDEN_LUNG_CANCER_GOOD_SURVIVAL_A4		179	0.472222	1.88404	0	0.0277605	0.493	4660	tags=47%, list=23%, signal=61%
REACTOME_NITRIC_OXIDE_STIMULATES_GUANYLATE_CYCLASE	REACTOME_NITRIC_OXIDE_STIMULATES_GUANYLATE_CYCLASE		24	0.643643	1.86956	0	0.0324411	0.568	1215	tags=42%, list=6%, signal=44%
HORTON_SREBF_TARGETS	HORTON_SREBF_TARGETS		24	0.653552	1.86584	0.0020284	0.0329435	0.586	3450	tags=50%, list=17%, signal=60%
SOTIRIOU_BREAST_CANCER_GRADE_1_VS_3_DN	SOTIRIOU_BREAST_CANCER_GRADE_1_VS_3_DN		49	0.571114	1.86338	0	0.0330132	0.599	4586	tags=49%, list=22%, signal=63%
RUAN_RESPONSE_TO_TNF_TROGLITAZONE_DN	RUAN_RESPONSE_TO_TNF_TROGLITAZONE_DN		38	0.589585	1.86189	0	0.0327065	0.607	3751	tags=45%, list=18%, signal=55%
ZHAN_MULTIPLE_MYELOMA_MF_DN	ZHAN_MULTIPLE_MYELOMA_MF_DN		36	0.608505	1.85676	0	0.0344512	0.64	2105	tags=36%, list=10%, signal=40%
MASRI_RESISTANCE_TO_TAMOXIFEN_AND_AROMATASE_INHIBITORS_DN	MASRI_RESISTANCE_TO_TAMOXIFEN_AND_AROMATASE_INHIBITORS_DN		16	0.714955	1.85541	0.00198807	0.0339869	0.645	2069	tags=56%, list=10%, signal=63%
YANG_BREAST_CANCER_ESR1_UP	YANG_BREAST_CANCER_ESR1_UP		34	0.60039	1.84094	0	0.0409423	0.722	2317	tags=38%, list=11%, signal=43%
CHANG_CORE_SERUM_RESPONSE_DN	CHANG_CORE_SERUM_RESPONSE_DN		192	0.443836	1.83983	0	0.0401998	0.726	4551	tags=46%, list=22%, signal=58%
LE_EGR2_TARGETS_DN	LE_EGR2_TARGETS_DN		104	0.482293	1.83001	0	0.0447172	0.774	4079	tags=45%, list=20%, signal=56%
CROONQUIST_IL6_DEPRIVATION_UP	CROONQUIST_IL6_DEPRIVATION_UP		18	0.679847	1.82985	0.00390625	0.0436233	0.776	1574	tags=28%, list=8%, signal=30%
DUTERTRE_ESTRADIOL_RESPONSE_24HR_DN	DUTERTRE_ESTRADIOL_RESPONSE_24HR_DN		480	0.406822	1.82664	0	0.0439366	0.787	3068	tags=32%, list=15%, signal=36%
STEIN_ESTROGEN_RESPONSE_NOT_VIA_ESRRA	STEIN_ESTROGEN_RESPONSE_NOT_VIA_ESRRA		18	0.697409	1.82649	0	0.0428921	0.787	1168	tags=28%, list=6%, signal=29%
PRAMOONJAGO_SOX4_TARGETS_UP	PRAMOONJAGO_SOX4_TARGETS_UP		51	0.55033	1.82463	0.00192308	0.0428667	0.8	2127	tags=37%, list=10%, signal=41%
EBAUER_TARGETS_OF_PAX3_FOXO1_FUSION_DN	EBAUER_TARGETS_OF_PAX3_FOXO1_FUSION_DN		42	0.573575	1.81918	0.0021692	0.0453826	0.83	3549	tags=43%, list=17%, signal=52%
LABBE_TGFB1_TARGETS_UP	LABBE_TGFB1_TARGETS_UP		94	0.485976	1.8143	0	0.0467358	0.84	3839	tags=39%, list=19%, signal=48%
RAY_TUMORIGENESIS_BY_ERBB2_CDC25A_DN	RAY_TUMORIGENESIS_BY_ERBB2_CDC25A_DN		148	0.453941	1.8095	0	0.0489016	0.858	3192	tags=33%, list=16%, signal=39%
DOANE_BREAST_CANCER_ESR1_UP	DOANE_BREAST_CANCER_ESR1_UP		104	0.482253	1.80512	0	0.0506965	0.876	2150	tags=29%, list=11%, signal=32%
CHARAFE_BREAST_CANCER_LUMINAL_VS_MESENCHYMAL_UP	CHARAFE_BREAST_CANCER_LUMINAL_VS_MESENCHYMAL_UP		427	0.405794	1.8016	0	0.0519601	0.885	4521	tags=36%, list=22%, signal=46%
REN_ALVEOLAR_RHABDOMYOSARCOMA_DN	REN_ALVEOLAR_RHABDOMYOSARCOMA_DN		393	0.406552	1.80132	0	0.0511089	0.886	4435	tags=34%, list=22%, signal=43%
NIELSEN_GIST_AND_SYNOVIAL_SARCOMA_DN	NIELSEN_GIST_AND_SYNOVIAL_SARCOMA_DN		17	0.688231	1.7974	0.00421053	0.0525435	0.9	1523	tags=35%, list=7%, signal=38%
REACTOME_GLYCOLYSIS	REACTOME_GLYCOLYSIS		26	0.626306	1.79727	0.002	0.0516266	0.903	4920	tags=65%, list=24%, signal=86%
DARWICHE_PAPILLOMA_RISK_HIGH_VS_LOW_DN	DARWICHE_PAPILLOMA_RISK_HIGH_VS_LOW_DN		28	0.605818	1.79119	0	0.0542117	0.916	2118	tags=18%, list=10%, signal=20%
FINETTI_BREAST_CANCERS_KINOME_BLUE	FINETTI_BREAST_CANCERS_KINOME_BLUE		20	0.657441	1.78935	0	0.0542153	0.92	250	tags=20%, list=1%, signal=20%
FARMER_BREAST_CANCER_APOCRINE_VS_LUMINAL	FARMER_BREAST_CANCER_APOCRINE_VS_LUMINAL		308	0.408177	1.78477	0	0.0563279	0.933	3892	tags=34%, list=19%, signal=41%
SHAFFER_IRF4_MULTIPLE_MYELOMA_PROGRAM	SHAFFER_IRF4_MULTIPLE_MYELOMA_PROGRAM		33	0.584555	1.78424	0	0.0555728	0.934	3048	tags=39%, list=15%, signal=46%
KEGG_TYPE_II_DIABETES_MELLITUS	KEGG_TYPE_II_DIABETES_MELLITUS		43	0.544745	1.7826	0	0.0556723	0.938	4613	tags=44%, list=23%, signal=57%
KEEN_RESPONSE_TO_ROSIGLITAZONE_DN	KEEN_RESPONSE_TO_ROSIGLITAZONE_DN		95	0.477489	1.77877	0	0.0572492	0.946	1930	tags=24%, list=9%, signal=27%
DORN_ADENOVIRUS_INFECTION_48HR_DN	DORN_ADENOVIRUS_INFECTION_48HR_DN		38	0.560411	1.77859	0	0.0563245	0.947	1283	tags=26%, list=6%, signal=28%
LI_WILMS_TUMOR_VS_FETAL_KIDNEY_1_UP	LI_WILMS_TUMOR_VS_FETAL_KIDNEY_1_UP		173	0.439514	1.77806	0	0.0556628	0.948	3772	tags=35%, list=18%, signal=43%
FRIDMAN_SENESCENCE_UP	FRIDMAN_SENESCENCE_UP		71	0.49974	1.7764	0	0.0558606	0.951	1989	tags=31%, list=10%, signal=34%
ZHANG_RESPONSE_TO_CANTHARIDIN_UP	ZHANG_RESPONSE_TO_CANTHARIDIN_UP		18	0.665886	1.7749	0.00414938	0.0558342	0.952	4598	tags=56%, list=23%, signal=72%
FRASOR_RESPONSE_TO_ESTRADIOL_DN	FRASOR_RESPONSE_TO_ESTRADIOL_DN		76	0.494342	1.77188	0	0.0568188	0.96	3531	tags=43%, list=17%, signal=52%
WIERENGA_STAT5A_TARGETS_GROUP1	WIERENGA_STAT5A_TARGETS_GROUP1		122	0.460059	1.76978	0.00190476	0.0574881	0.964	3170	tags=35%, list=16%, signal=41%
LU_AGING_BRAIN_UP	LU_AGING_BRAIN_UP		245	0.423474	1.76442	0	0.0596444	0.966	2520	tags=22%, list=12%, signal=25%
PID_ERBB2_ERBB3_PATHWAY	PID_ERBB2_ERBB3_PATHWAY		43	0.548093	1.7617	0.002079	0.0604855	0.968	5921	tags=49%, list=29%, signal=69%
PID_CD8_TCR_DOWNSTREAM_PATHWAY	PID_CD8_TCR_DOWNSTREAM_PATHWAY		44	0.539922	1.76013	0	0.060609	0.97	3306	tags=25%, list=16%, signal=30%
GROSS_HYPOXIA_VIA_ELK3_AND_HIF1A_UP	GROSS_HYPOXIA_VIA_ELK3_AND_HIF1A_UP		136	0.448585	1.7565	0	0.0621286	0.974	4016	tags=39%, list=20%, signal=48%
BRUNO_HEMATOPOIESIS	BRUNO_HEMATOPOIESIS		57	0.519093	1.75599	0.00198807	0.0615019	0.974	3164	tags=33%, list=16%, signal=39%
SCHAEFFER_PROSTATE_DEVELOPMENT_48HR_UP	SCHAEFFER_PROSTATE_DEVELOPMENT_48HR_UP		430	0.393227	1.75533	0	0.0608785	0.974	3757	tags=33%, list=18%, signal=39%
COWLING_MYCN_TARGETS	COWLING_MYCN_TARGETS		39	0.555654	1.75216	0.00190114	0.0625199	0.979	2496	tags=31%, list=12%, signal=35%
HUANG_GATA2_TARGETS_UP	HUANG_GATA2_TARGETS_UP		136	0.448455	1.74814	0	0.0643301	0.983	4041	tags=37%, list=20%, signal=46%
VALK_AML_CLUSTER_7	VALK_AML_CLUSTER_7		25	0.61685	1.74746	0.00210526	0.0638012	0.983	2917	tags=44%, list=14%, signal=51%
GESERICK_TERT_TARGETS_DN	GESERICK_TERT_TARGETS_DN		21	0.638925	1.74603	0.00614754	0.0638478	0.983	1911	tags=43%, list=9%, signal=47%
BRACHAT_RESPONSE_TO_METHOTREXATE_DN	BRACHAT_RESPONSE_TO_METHOTREXATE_DN		26	0.603681	1.74559	0.00200401	0.0632494	0.983	3391	tags=42%, list=17%, signal=51%
COLDREN_GEFITINIB_RESISTANCE_DN	COLDREN_GEFITINIB_RESISTANCE_DN		215	0.416693	1.74395	0	0.0633027	0.983	3884	tags=34%, list=19%, signal=42%
WATANABE_ULCERATIVE_COLITIS_WITH_CANCER_UP	WATANABE_ULCERATIVE_COLITIS_WITH_CANCER_UP		17	0.659475	1.73772	0.00592885	0.0672298	0.989	3962	tags=47%, list=19%, signal=58%
GARCIA_TARGETS_OF_FLI1_AND_DAX1_UP	GARCIA_TARGETS_OF_FLI1_AND_DAX1_UP		54	0.510064	1.73596	0.00408998	0.0675323	0.991	4154	tags=44%, list=20%, signal=56%
PASINI_SUZ12_TARGETS_DN	PASINI_SUZ12_TARGETS_DN		299	0.399021	1.73399	0	0.0681526	0.992	4376	tags=35%, list=21%, signal=44%
BIOCARTA_CCR5_PATHWAY	BIOCARTA_CCR5_PATHWAY		15	0.688955	1.73188	0.00814664	0.0686438	0.994	1643	tags=27%, list=8%, signal=29%
MAHADEVAN_RESPONSE_TO_MP470_DN	MAHADEVAN_RESPONSE_TO_MP470_DN		19	0.651521	1.73143	0.00210084	0.06796	0.994	1930	tags=47%, list=9%, signal=52%
CASORELLI_APL_SECONDARY_VS_DE_NOVO_UP	CASORELLI_APL_SECONDARY_VS_DE_NOVO_UP		34	0.560641	1.72945	0.002	0.0686064	0.995	1681	tags=21%, list=8%, signal=22%
SASSON_RESPONSE_TO_GONADOTROPHINS_UP	SASSON_RESPONSE_TO_GONADOTROPHINS_UP		84	0.473316	1.72823	0	0.0684137	0.996	2464	tags=25%, list=12%, signal=28%
ZHENG_FOXP3_TARGETS_UP	ZHENG_FOXP3_TARGETS_UP		23	0.61565	1.72795	0.0120482	0.067812	0.996	3994	tags=57%, list=20%, signal=70%
VALK_AML_CLUSTER_1	VALK_AML_CLUSTER_1		26	0.605574	1.72708	0.00396825	0.0678578	0.996	2287	tags=31%, list=11%, signal=35%
WIERENGA_STAT5A_TARGETS_UP	WIERENGA_STAT5A_TARGETS_UP		192	0.419366	1.72513	0	0.0684231	0.996	2064	tags=25%, list=10%, signal=28%
WINTER_HYPOXIA_METAGENE	WINTER_HYPOXIA_METAGENE		220	0.410516	1.71996	0	0.0711708	0.997	1970	tags=24%, list=10%, signal=26%
OHGUCHI_LIVER_HNF4A_TARGETS_UP	OHGUCHI_LIVER_HNF4A_TARGETS_UP		41	0.551023	1.71811	0	0.071544	0.997	2205	tags=32%, list=11%, signal=35%
REACTOME_TRANSPORT_OF_GLUCOSE_AND_OTHER_SUGARS_BILE_SALTS_AND_ORGANIC_ACIDS_METAL_IONS_AND_AMINE_COMPOUNDS	REACTOME_TRANSPORT_OF_GLUCOSE_AND_OTHER_SUGARS_BILE_SALTS_AND_ORGANIC_ACIDS_METAL_IONS_AND_AMINE_COMPOUNDS		79	0.476329	1.71449	0.00199601	0.0735637	0.997	3031	tags=35%, list=15%, signal=41%
ZWANG_CLASS_3_TRANSIENTLY_INDUCED_BY_EGF	ZWANG_CLASS_3_TRANSIENTLY_INDUCED_BY_EGF		202	0.413378	1.71282	0	0.0738642	0.998	3065	tags=27%, list=15%, signal=31%
MATTIOLI_MULTIPLE_MYELOMA_WITH_14Q32_TRANSLOCATIONS	MATTIOLI_MULTIPLE_MYELOMA_WITH_14Q32_TRANSLOCATIONS		34	0.560005	1.71057	0.0021097	0.0745619	0.999	4586	tags=50%, list=22%, signal=64%
WANG_LSD1_TARGETS_UP	WANG_LSD1_TARGETS_UP		22	0.606451	1.70935	0.00795229	0.0744297	0.999	1715	tags=32%, list=8%, signal=35%
KEGG_VEGF_SIGNALING_PATHWAY	KEGG_VEGF_SIGNALING_PATHWAY		69	0.489661	1.7038	0	0.077657	0.999	2708	tags=25%, list=13%, signal=28%
CLIMENT_BREAST_CANCER_COPY_NUMBER_UP	CLIMENT_BREAST_CANCER_COPY_NUMBER_UP		21	0.623698	1.70378	0.0102249	0.0768184	0.999	463	tags=19%, list=2%, signal=19%
SASSON_RESPONSE_TO_FORSKOLIN_UP	SASSON_RESPONSE_TO_FORSKOLIN_UP		84	0.471982	1.70179	0.00393701	0.0775341	0.999	2040	tags=21%, list=10%, signal=24%
ONO_FOXP3_TARGETS_UP	ONO_FOXP3_TARGETS_UP		18	0.635004	1.69877	0.0122699	0.0793375	0.999	333	tags=17%, list=2%, signal=17%
GROSS_HYPOXIA_VIA_HIF1A_DN	GROSS_HYPOXIA_VIA_HIF1A_DN		102	0.449998	1.69773	0.00197628	0.07923	1	3483	tags=32%, list=17%, signal=39%
BIOCARTA_TOB1_PATHWAY	BIOCARTA_TOB1_PATHWAY		16	0.654033	1.69479	0.0102669	0.0807656	1	1602	tags=25%, list=8%, signal=27%
BAELDE_DIABETIC_NEPHROPATHY_DN	BAELDE_DIABETIC_NEPHROPATHY_DN		417	0.380312	1.69462	0	0.0801065	1	2985	tags=24%, list=15%, signal=28%
SA_PTEN_PATHWAY	SA_PTEN_PATHWAY		17	0.640423	1.69399	0.00982318	0.0798486	1	7070	tags=88%, list=35%, signal=135%
BIOCARTA_PDGF_PATHWAY	BIOCARTA_PDGF_PATHWAY		29	0.575461	1.6927	0.00200803	0.080126	1	853	tags=14%, list=4%, signal=14%
KEGG_SNARE_INTERACTIONS_IN_VESICULAR_TRANSPORT	KEGG_SNARE_INTERACTIONS_IN_VESICULAR_TRANSPORT		38	0.529712	1.69063	0.00389864	0.0810292	1	5334	tags=47%, list=26%, signal=64%
KEGG_MAPK_SIGNALING_PATHWAY	KEGG_MAPK_SIGNALING_PATHWAY		246	0.399539	1.68963	0	0.0809637	1	3561	tags=25%, list=17%, signal=30%
BIOCARTA_ERK_PATHWAY	BIOCARTA_ERK_PATHWAY		27	0.571853	1.68876	0.00767754	0.080954	1	5682	tags=48%, list=28%, signal=67%
Top 100 gene sets enriched in ARsig-hi shGREB1 compared to shRenilla
NAME	GS<br> follow link to MSigDB	GS DETAILS	SIZE	ES	NES	NOM p-val	FDR q-val	FWER p-val	RANK AT MAX	LEADING EDGE
ROSTY_CERVICAL_CANCER_PROLIFERATION_CLUSTER	ROSTY_CERVICAL_CANCER_PROLIFERATION_CLUSTER	Details ...	135	-0.857829	-3.37413	0	0	0	1422	tags=78%, list=7%, signal=83%
KOBAYASHI_EGFR_SIGNALING_24HR_DN	KOBAYASHI_EGFR_SIGNALING_24HR_DN	Details ...	237	-0.745761	-3.20181	0	0	0	2825	tags=74%, list=14%, signal=85%
DUTERTRE_ESTRADIOL_RESPONSE_24HR_UP	DUTERTRE_ESTRADIOL_RESPONSE_24HR_UP	Details ...	313	-0.739092	-3.18934	0	0	0	1710	tags=62%, list=8%, signal=67%
CHANG_CYCLING_GENES	CHANG_CYCLING_GENES	Details ...	142	-0.795318	-3.1792	0	0	0	1788	tags=67%, list=9%, signal=73%
SOTIRIOU_BREAST_CANCER_GRADE_1_VS_3_UP	SOTIRIOU_BREAST_CANCER_GRADE_1_VS_3_UP	Details ...	146	-0.792963	-3.14694	0	0	0	1886	tags=71%, list=9%, signal=77%
ZHOU_CELL_CYCLE_GENES_IN_IR_RESPONSE_6HR	ZHOU_CELL_CYCLE_GENES_IN_IR_RESPONSE_6HR	Details ...	82	-0.8522	-3.09969	0	0	0	2309	tags=88%, list=11%, signal=99%
KONG_E2F3_TARGETS	KONG_E2F3_TARGETS	Details ...	94	-0.839819	-3.09639	0	0	0	1730	tags=77%, list=8%, signal=83%
CROONQUIST_IL6_DEPRIVATION_DN	CROONQUIST_IL6_DEPRIVATION_DN	Details ...	96	-0.82272	-3.06783	0	0	0	1638	tags=76%, list=8%, signal=82%
GRAHAM_NORMAL_QUIESCENT_VS_NORMAL_DIVIDING_DN	GRAHAM_NORMAL_QUIESCENT_VS_NORMAL_DIVIDING_DN	Details ...	83	-0.831794	-3.05807	0	0	0	1422	tags=73%, list=7%, signal=79%
ZHANG_TLX_TARGETS_DN	ZHANG_TLX_TARGETS_DN	Details ...	88	-0.815414	-3.03918	0	0	0	2103	tags=82%, list=10%, signal=91%
ZHANG_TLX_TARGETS_60HR_DN	ZHANG_TLX_TARGETS_60HR_DN	Details ...	267	-0.711241	-3.03179	0	0	0	2569	tags=64%, list=13%, signal=72%
LEE_EARLY_T_LYMPHOCYTE_UP	LEE_EARLY_T_LYMPHOCYTE_UP	Details ...	99	-0.808559	-3.02293	0	0	0	1506	tags=65%, list=7%, signal=69%
ZHOU_CELL_CYCLE_GENES_IN_IR_RESPONSE_24HR	ZHOU_CELL_CYCLE_GENES_IN_IR_RESPONSE_24HR	Details ...	122	-0.77351	-3.00503	0	0	0	2334	tags=77%, list=11%, signal=86%
KANG_DOXORUBICIN_RESISTANCE_UP	KANG_DOXORUBICIN_RESISTANCE_UP	Details ...	52	-0.893849	-2.99711	0	0	0	1355	tags=88%, list=7%, signal=95%
BURTON_ADIPOGENESIS_3	BURTON_ADIPOGENESIS_3	Details ...	98	-0.789835	-2.97627	0	0	0	1994	tags=74%, list=10%, signal=82%
HOFFMANN_LARGE_TO_SMALL_PRE_BII_LYMPHOCYTE_UP	HOFFMANN_LARGE_TO_SMALL_PRE_BII_LYMPHOCYTE_UP	Details ...	159	-0.72326	-2.94153	0	0	0	2769	tags=63%, list=14%, signal=72%
CROONQUIST_NRAS_SIGNALING_DN	CROONQUIST_NRAS_SIGNALING_DN	Details ...	72	-0.830118	-2.92167	0	0	0	1638	tags=79%, list=8%, signal=86%
MANALO_HYPOXIA_DN	MANALO_HYPOXIA_DN	Details ...	275	-0.681161	-2.91805	0	0	0	3316	tags=63%, list=16%, signal=74%
WHITEFORD_PEDIATRIC_CANCER_MARKERS	WHITEFORD_PEDIATRIC_CANCER_MARKERS	Details ...	112	-0.770082	-2.91509	0	0	0	1799	tags=68%, list=9%, signal=74%
PUJANA_XPRSS_INT_NETWORK	PUJANA_XPRSS_INT_NETWORK	Details ...	165	-0.712279	-2.91475	0	0	0	3516	tags=65%, list=17%, signal=78%
REACTOME_DNA_REPLICATION	REACTOME_DNA_REPLICATION		183	-0.703589	-2.89823	0	0	0	2691	tags=52%, list=13%, signal=59%
GRAHAM_CML_DIVIDING_VS_NORMAL_QUIESCENT_UP	GRAHAM_CML_DIVIDING_VS_NORMAL_QUIESCENT_UP		167	-0.71276	-2.8929	0	0	0	1480	tags=53%, list=7%, signal=56%
PUJANA_BRCA_CENTERED_NETWORK	PUJANA_BRCA_CENTERED_NETWORK		116	-0.749714	-2.8903	0	0	0	3120	tags=64%, list=15%, signal=75%
ZHAN_MULTIPLE_MYELOMA_PR_UP	ZHAN_MULTIPLE_MYELOMA_PR_UP		44	-0.883042	-2.88842	0	0	0	1355	tags=89%, list=7%, signal=95%
SONG_TARGETS_OF_IE86_CMV_PROTEIN	SONG_TARGETS_OF_IE86_CMV_PROTEIN		60	-0.820908	-2.83908	0	0	0	2583	tags=85%, list=13%, signal=97%
KAUFFMANN_MELANOMA_RELAPSE_UP	KAUFFMANN_MELANOMA_RELAPSE_UP		60	-0.81319	-2.83667	0	0	0	1765	tags=67%, list=9%, signal=73%
REN_BOUND_BY_E2F	REN_BOUND_BY_E2F		61	-0.826042	-2.83341	0	0	0	2430	tags=80%, list=12%, signal=91%
FUJII_YBX1_TARGETS_DN	FUJII_YBX1_TARGETS_DN		195	-0.682528	-2.81998	0	0	0	1710	tags=48%, list=8%, signal=52%
PUJANA_BRCA2_PCC_NETWORK	PUJANA_BRCA2_PCC_NETWORK		402	-0.632968	-2.80514	0	0	0	3530	tags=52%, list=17%, signal=62%
ZHANG_TLX_TARGETS_36HR_DN	ZHANG_TLX_TARGETS_36HR_DN		183	-0.682847	-2.79454	0	0	0	3808	tags=64%, list=19%, signal=78%
RUIZ_TNC_TARGETS_DN	RUIZ_TNC_TARGETS_DN		132	-0.711998	-2.78502	0	0	0	1852	tags=55%, list=9%, signal=60%
SHEDDEN_LUNG_CANCER_POOR_SURVIVAL_A6	SHEDDEN_LUNG_CANCER_POOR_SURVIVAL_A6		429	-0.619763	-2.7832	0	0	0	2690	tags=46%, list=13%, signal=52%
SARRIO_EPITHELIAL_MESENCHYMAL_TRANSITION_UP	SARRIO_EPITHELIAL_MESENCHYMAL_TRANSITION_UP		168	-0.68478	-2.77177	0	0	0	1775	tags=49%, list=9%, signal=54%
BLUM_RESPONSE_TO_SALIRASIB_DN	BLUM_RESPONSE_TO_SALIRASIB_DN		338	-0.631931	-2.76741	0	0	0	2331	tags=48%, list=11%, signal=54%
MISSIAGLIA_REGULATED_BY_METHYLATION_DN	MISSIAGLIA_REGULATED_BY_METHYLATION_DN		116	-0.714378	-2.76021	0	0	0	2268	tags=61%, list=11%, signal=68%
ODONNELL_TARGETS_OF_MYC_AND_TFRC_DN	ODONNELL_TARGETS_OF_MYC_AND_TFRC_DN		44	-0.842504	-2.75874	0	0	0	1007	tags=68%, list=5%, signal=72%
GAVIN_FOXP3_TARGETS_CLUSTER_P6	GAVIN_FOXP3_TARGETS_CLUSTER_P6		86	-0.735841	-2.75247	0	0	0	1355	tags=52%, list=7%, signal=56%
REACTOME_MITOTIC_M_M_G1_PHASES	REACTOME_MITOTIC_M_M_G1_PHASES		163	-0.690032	-2.75081	0	0	0	2691	tags=50%, list=13%, signal=57%
REACTOME_CELL_CYCLE_MITOTIC	REACTOME_CELL_CYCLE_MITOTIC		302	-0.635127	-2.74188	0	0	0	2825	tags=44%, list=14%, signal=51%
VERNELL_RETINOBLASTOMA_PATHWAY_UP	VERNELL_RETINOBLASTOMA_PATHWAY_UP		68	-0.770345	-2.73698	0	0	0	3022	tags=76%, list=15%, signal=89%
ODONNELL_TFRC_TARGETS_DN	ODONNELL_TFRC_TARGETS_DN		122	-0.70783	-2.73482	0	0	0	2013	tags=55%, list=10%, signal=61%
WINNEPENNINCKX_MELANOMA_METASTASIS_UP	WINNEPENNINCKX_MELANOMA_METASTASIS_UP		155	-0.677356	-2.72006	0	0	0	3124	tags=59%, list=15%, signal=70%
RHODES_UNDIFFERENTIATED_CANCER	RHODES_UNDIFFERENTIATED_CANCER		68	-0.771125	-2.71755	0	0	0	2044	tags=60%, list=10%, signal=67%
FERREIRA_EWINGS_SARCOMA_UNSTABLE_VS_STABLE_UP	FERREIRA_EWINGS_SARCOMA_UNSTABLE_VS_STABLE_UP		151	-0.66896	-2.7167	0	0	0	2813	tags=50%, list=14%, signal=58%
ISHIDA_E2F_TARGETS	ISHIDA_E2F_TARGETS		51	-0.816304	-2.71662	0	0	0	2531	tags=90%, list=12%, signal=103%
MORI_IMMATURE_B_LYMPHOCYTE_DN	MORI_IMMATURE_B_LYMPHOCYTE_DN		88	-0.744771	-2.71559	0	0	0	2260	tags=67%, list=11%, signal=75%
WU_APOPTOSIS_BY_CDKN1A_VIA_TP53	WU_APOPTOSIS_BY_CDKN1A_VIA_TP53		53	-0.807038	-2.71539	0	0	0	1490	tags=66%, list=7%, signal=71%
MORI_LARGE_PRE_BII_LYMPHOCYTE_UP	MORI_LARGE_PRE_BII_LYMPHOCYTE_UP		82	-0.74478	-2.68787	0	0	0	2082	tags=62%, list=10%, signal=69%
REACTOME_G2_M_CHECKPOINTS	REACTOME_G2_M_CHECKPOINTS		41	-0.841475	-2.68534	0	0	0	2309	tags=78%, list=11%, signal=88%
MUELLER_PLURINET	MUELLER_PLURINET		295	-0.612595	-2.66699	0	0	0	3540	tags=52%, list=17%, signal=62%
REACTOME_CELL_CYCLE	REACTOME_CELL_CYCLE		388	-0.600699	-2.66352	0	0	0	3620	tags=46%, list=18%, signal=55%
FARMER_BREAST_CANCER_CLUSTER_2	FARMER_BREAST_CANCER_CLUSTER_2		32	-0.858291	-2.65484	0	0	0	1148	tags=72%, list=6%, signal=76%
EGUCHI_CELL_CYCLE_RB1_TARGETS	EGUCHI_CELL_CYCLE_RB1_TARGETS		23	-0.936228	-2.65413	0	0	0	1324	tags=100%, list=6%, signal=107%
LE_EGR2_TARGETS_UP	LE_EGR2_TARGETS_UP		104	-0.701399	-2.65343	0	0	0	1355	tags=52%, list=7%, signal=55%
KAMMINGA_EZH2_TARGETS	KAMMINGA_EZH2_TARGETS		41	-0.824266	-2.64628	0	0	0	3022	tags=85%, list=15%, signal=100%
CHIANG_LIVER_CANCER_SUBCLASS_PROLIFERATION_UP	CHIANG_LIVER_CANCER_SUBCLASS_PROLIFERATION_UP		167	-0.659389	-2.64116	0	0	0	1852	tags=49%, list=9%, signal=54%
PUJANA_BREAST_CANCER_WITH_BRCA1_MUTATED_UP	PUJANA_BREAST_CANCER_WITH_BRCA1_MUTATED_UP		56	-0.769478	-2.63511	0	0	0	3248	tags=82%, list=16%, signal=97%
BASAKI_YBX1_TARGETS_UP	BASAKI_YBX1_TARGETS_UP		274	-0.611531	-2.6288	0	0	0	2150	tags=43%, list=11%, signal=48%
REACTOME_DNA_STRAND_ELONGATION	REACTOME_DNA_STRAND_ELONGATION		30	-0.879369	-2.62197	0	0	0	1558	tags=87%, list=8%, signal=94%
REACTOME_ACTIVATION_OF_THE_PRE_REPLICATIVE_COMPLEX	REACTOME_ACTIVATION_OF_THE_PRE_REPLICATIVE_COMPLEX		30	-0.864948	-2.6177	0	0	0	2309	tags=87%, list=11%, signal=98%
REACTOME_S_PHASE	REACTOME_S_PHASE		105	-0.69461	-2.61571	0	0	0	2502	tags=45%, list=12%, signal=51%
WHITFIELD_CELL_CYCLE_LITERATURE	WHITFIELD_CELL_CYCLE_LITERATURE		44	-0.816096	-2.61449	0	0	0	1691	tags=80%, list=8%, signal=87%
FRASOR_RESPONSE_TO_SERM_OR_FULVESTRANT_DN	FRASOR_RESPONSE_TO_SERM_OR_FULVESTRANT_DN		50	-0.797489	-2.61224	0	0	0	1420	tags=74%, list=7%, signal=79%
REACTOME_ACTIVATION_OF_ATR_IN_RESPONSE_TO_REPLICATION_STRESS	REACTOME_ACTIVATION_OF_ATR_IN_RESPONSE_TO_REPLICATION_STRESS		35	-0.831508	-2.60752	0	0	0	2309	tags=74%, list=11%, signal=84%
KEGG_DNA_REPLICATION	KEGG_DNA_REPLICATION		36	-0.842354	-2.60566	0	0	0	2193	tags=81%, list=11%, signal=90%
WONG_EMBRYONIC_STEM_CELL_CORE	WONG_EMBRYONIC_STEM_CELL_CORE		331	-0.598319	-2.60172	0	0	0	4395	tags=54%, list=22%, signal=68%
MARKEY_RB1_ACUTE_LOF_DN	MARKEY_RB1_ACUTE_LOF_DN		216	-0.622237	-2.59688	0	0	0	2411	tags=50%, list=12%, signal=56%
TOYOTA_TARGETS_OF_MIR34B_AND_MIR34C	TOYOTA_TARGETS_OF_MIR34B_AND_MIR34C		426	-0.578899	-2.57986	0	0	0	3894	tags=49%, list=19%, signal=59%
KAUFFMANN_DNA_REPLICATION_GENES	KAUFFMANN_DNA_REPLICATION_GENES		142	-0.648381	-2.5773	0	0	0	2411	tags=46%, list=12%, signal=52%
SENGUPTA_NASOPHARYNGEAL_CARCINOMA_UP	SENGUPTA_NASOPHARYNGEAL_CARCINOMA_UP		266	-0.599715	-2.57588	0	0	0	2766	tags=45%, list=14%, signal=52%
WHITFIELD_CELL_CYCLE_G1_S	WHITFIELD_CELL_CYCLE_G1_S		134	-0.654364	-2.57441	0	0	0	3891	tags=56%, list=19%, signal=69%
VECCHI_GASTRIC_CANCER_EARLY_UP	VECCHI_GASTRIC_CANCER_EARLY_UP		398	-0.576086	-2.57275	0	0	0	2582	tags=42%, list=13%, signal=47%
REACTOME_G1_S_TRANSITION	REACTOME_G1_S_TRANSITION		106	-0.68156	-2.57047	0	0	0	2502	tags=43%, list=12%, signal=49%
KAUFFMANN_DNA_REPAIR_GENES	KAUFFMANN_DNA_REPAIR_GENES		227	-0.612866	-2.55579	0	0	0	3308	tags=44%, list=16%, signal=52%
REACTOME_SYNTHESIS_OF_DNA	REACTOME_SYNTHESIS_OF_DNA		89	-0.696635	-2.55224	0	0	0	2309	tags=43%, list=11%, signal=48%
REACTOME_MITOTIC_PROMETAPHASE	REACTOME_MITOTIC_PROMETAPHASE		82	-0.697529	-2.54534	0	0	0	2691	tags=57%, list=13%, signal=66%
REACTOME_PROCESSING_OF_CAPPED_INTRON_CONTAINING_PRE_MRNA	REACTOME_PROCESSING_OF_CAPPED_INTRON_CONTAINING_PRE_MRNA		132	-0.647368	-2.53835	0	0	0	5661	tags=78%, list=28%, signal=107%
LI_WILMS_TUMOR_VS_FETAL_KIDNEY_1_DN	LI_WILMS_TUMOR_VS_FETAL_KIDNEY_1_DN		157	-0.628491	-2.52346	0	0	0	2309	tags=50%, list=11%, signal=56%
MOLENAAR_TARGETS_OF_CCND1_AND_CDK4_DN	MOLENAAR_TARGETS_OF_CCND1_AND_CDK4_DN		53	-0.749384	-2.52166	0	0	0	1435	tags=66%, list=7%, signal=71%
HORIUCHI_WTAP_TARGETS_DN	HORIUCHI_WTAP_TARGETS_DN		295	-0.585533	-2.51983	0	0	0	2758	tags=43%, list=14%, signal=49%
REICHERT_MITOSIS_LIN9_TARGETS	REICHERT_MITOSIS_LIN9_TARGETS		28	-0.86595	-2.5181	0	0	0	2202	tags=82%, list=11%, signal=92%
AMUNDSON_GAMMA_RADIATION_RESPONSE	AMUNDSON_GAMMA_RADIATION_RESPONSE		40	-0.795495	-2.50146	0	0	0	2024	tags=75%, list=10%, signal=83%
LY_AGING_OLD_DN	LY_AGING_OLD_DN		51	-0.751057	-2.49624	0	0	0	1657	tags=59%, list=8%, signal=64%
TANG_SENESCENCE_TP53_TARGETS_DN	TANG_SENESCENCE_TP53_TARGETS_DN		55	-0.740578	-2.49475	0	0	0	1723	tags=73%, list=8%, signal=79%
BENPORATH_PROLIFERATION	BENPORATH_PROLIFERATION		137	-0.630638	-2.48875	0	0	0	1682	tags=45%, list=8%, signal=49%
REACTOME_MRNA_SPLICING	REACTOME_MRNA_SPLICING		104	-0.649948	-2.47868	0	0	0	6734	tags=90%, list=33%, signal=134%
GARGALOVIC_RESPONSE_TO_OXIDIZED_PHOSPHOLIPIDS_TURQUOISE_DN	GARGALOVIC_RESPONSE_TO_OXIDIZED_PHOSPHOLIPIDS_TURQUOISE_DN		51	-0.756069	-2.4703	0	0	0	1863	tags=57%, list=9%, signal=62%
PID_FANCONI_PATHWAY	PID_FANCONI_PATHWAY		45	-0.766269	-2.47003	0	0	0	2544	tags=69%, list=12%, signal=79%
GARCIA_TARGETS_OF_FLI1_AND_DAX1_DN	GARCIA_TARGETS_OF_FLI1_AND_DAX1_DN		163	-0.611339	-2.46877	0	0	0	3552	tags=49%, list=17%, signal=59%
REACTOME_MRNA_PROCESSING	REACTOME_MRNA_PROCESSING		151	-0.626042	-2.46521	0	0	0	5661	tags=72%, list=28%, signal=99%
REACTOME_CELL_CYCLE_CHECKPOINTS	REACTOME_CELL_CYCLE_CHECKPOINTS		110	-0.649425	-2.45698	0	0	0	2309	tags=38%, list=11%, signal=43%
PID_ATR_PATHWAY	PID_ATR_PATHWAY		38	-0.76709	-2.45194	0	0	0	2309	tags=61%, list=11%, signal=68%
REACTOME_M_G1_TRANSITION	REACTOME_M_G1_TRANSITION		77	-0.681846	-2.4435	0	0	0	2309	tags=40%, list=11%, signal=45%
REACTOME_MITOTIC_G1_G1_S_PHASES	REACTOME_MITOTIC_G1_G1_S_PHASES		130	-0.630163	-2.44333	0	0	0	2502	tags=41%, list=12%, signal=46%
REACTOME_DNA_REPAIR	REACTOME_DNA_REPAIR		103	-0.651766	-2.44226	0	0	0	3300	tags=49%, list=16%, signal=58%
YU_MYC_TARGETS_UP	YU_MYC_TARGETS_UP		40	-0.761525	-2.44104	0	0	0	1355	tags=60%, list=7%, signal=64%
FINETTI_BREAST_CANCER_KINOME_RED	FINETTI_BREAST_CANCER_KINOME_RED		16	-0.937369	-2.43799	0	0	0	992	tags=94%, list=5%, signal=98%
GREENBAUM_E2A_TARGETS_UP	GREENBAUM_E2A_TARGETS_UP		32	-0.796506	-2.43664	0	0	0	1383	tags=66%, list=7%, signal=70%
REACTOME_E2F_MEDIATED_REGULATION_OF_DNA_REPLICATION	REACTOME_E2F_MEDIATED_REGULATION_OF_DNA_REPLICATION		33	-0.800552	-2.43284	0	0	0	1903	tags=64%, list=9%, signal=70%
CHEMNITZ_RESPONSE_TO_PROSTAGLANDIN_E2_UP	CHEMNITZ_RESPONSE_TO_PROSTAGLANDIN_E2_UP		138	-0.615132	-2.42816	0	0	0	2044	tags=41%, list=10%, signal=45%
