# Supplementary material for: GREB1 amplifies androgen receptor output in human prostate cancer and contributes to antiandrogen resistance
Source: eLife. 2019 Jan 15;8:e41913. doi: 10.7554/eLife.41913 (PMC6336405; doi:10.7554/eLife.41913)
Supplement: Supplementary file 1. [file elife-41913-supp1.xlsx]

## Sheet: 7
Supplementary file 1 : Primer list
RT-qPCR primers
Gene Symbol	Forward primer	Reverse primer
GAPDH	TGCACCACCAACTGCTTAGC	GGCATGGACTGTGGTCATGAG
AR	GCAGGAAGCAGTATCCGAAG	GACACCGACACTGCCTTACA
PSA	GTCTGCGGCGGTGTTCTG	TGCCGACCCAGCAAGATC
FKBP5	CTGTTCTGGCGTGAGTTGTGA	ACCCGTAAGGACTGAAATTCAACTA
TRPM8	Purchased from Qiagen
GREB1	GCTAAGTATGAGAGCGCAGG	TGGCCTTGCATATTTTCAGCA
GHRHR	TTTCCACAGCGACGACACTGAC	AGGCAGTTCAGGTAGACGGCTT
KLF8	CCTGAAAGCTCACCGCAGAATC	TGCTTGCGGAAATGGCGAGTGA
ACPP	CAAGACTGGTCCACGGAGTGTA	AGCAGAGTCCACGGCGAATGTG
TFF1	GGACCCCACGAACGGTG	GTGTCACGCCCTCCCAGT
XBP1	GCGCCTCACGCACCTG	GCTGCTACTCTGTTTTTCAGTTTCC
SRC1	ATCGGAGATCCTGCCAGCTTCA	ATCGCCTGTTCCTGGTTGTCCA
SRC2	GCCCAGAAAACAGCACTGCGAA	CTGATTGGTGGGAAAGGTCCAG
p300	GATGACCCTTCCCAGCCTCAAA	GCCAGATGATCTCATGGTGAAGG
ChIP-qPCR primers
Gene Symbol	Forward primer	Reverse primer
PSA enhancer	TGGGACAACTTGCAAACCTG	CCAGAGTAGGTCTGTTTTCAATCCA
FKBP5 enhancer	CCCCCTATTTTAATCGGAGTAC	TTTTGAAGAGCACAGAACACCCT
TFF1 promoter	CTGCAGAAGTGATTCATAGTGAGAGAT	CACCCCGTGAGCCACTGT
XBP1 promoter	ATACTTGGCAGCCTGTGACC	GGTCCACAAAGCAGGAAAAA
