# Supplementary material for: GREB1 amplifies androgen receptor output in human prostate cancer and contributes to antiandrogen resistance
Source: eLife. 2019 Jan 15;8:e41913. doi: 10.7554/eLife.41913 (PMC6336405; doi:10.7554/eLife.41913)
Supplement: Supplementary file 2. [file elife-41913-supp2.xlsx]

## Sheet: 8
Supplementary file 2 : The basal and luminal gene signatures used for GSEA
PROSTATE_LUMINAL_UP	PROSTATE_BASAL_UP
NA	NA
LOC101929572	UGT1A1
TBC1D3B	RASSF10
FCGR1C	IFNE
FGL1	VSNL1
GREM2	MIR205HG
UNC5D	MMP13
ACPP	TP63
KLK2	NIPAL4
CYP4F62P	TNS4
CD177	COL4A6
CNTNAP2	CDH13
MSMB	ZNF488
NPY	PTPRZ1
CWH43	WNT10A
LMAN1L	MIR31HG
CPB1	FOXI2
GP2	SYNDIG1
COL9A1	UGT1A6
ORM1	NOTCH4
CST1	CCDC8
SI	SLITRK6
PABPC1L2B	WIF1
ORM2	COL7A1
SNAP91	KCNJ15
FAM101A	NAV3
NELL1	LTBP2
LSAMP	HAS2
KLK3	CYP4B1
LINC00844	IL18
HCN4	FAM212A
CPNE4	TIMP3
PEBP4	PCDH7
LOC145837	P2RY2
KRTAP4-4	ANXA8
LOC440910	ESM1
PLA2G2A	TNC
FFAR2	KRT13
GREM1	IVL
CD38	GABRE
LINC01509	GJB5
DPP4	LINC00173
SFTPA2	C16orf74
PCAT4	TNNT1
POTEG	DKK3
IL1F10	IQCJ-SCHIP1
KCNQ2	GALNT5
LINC01554	IFI27L2
KLK4	GPR173
POTEM	TMEM253
SERPINA3	STK33
LRRC26	MARVELD1
CCK	EREG
LUZP2	RAB38
CPLX3	SERPINB5
PABPC1L2A	SLC52A1
MYBPC1	DLK2
EEF1A2	BMPER
STEAP4	GJB6
GABRG3	ITGB4
SLC25A18	FAM65C
KCNH6	LRP4
GRM8	PCOLCE2
BMPR1B-AS1	ABCA12
HGD	LOC101928034
FOLH1	ACOT11
SBSN	ANXA8L1
AFF3	IL1A
RPLP0P2	PRODH
SLC26A4	TWIST2
EGF	NTF4
SERPINA4	NYNRIN
CTNND2	TRIM29
GPR158	GJB4
SLC38A11	EVA1A
TENM1	PHLDA1
LINC00158	MEIS1
MEGF10	ETV4
SPINK1	FOLR1
FLJ41941	TMPRSS4
AZGP1	CDCA7
LINC01146	ARL4D
ABCC6P1	C12orf54
PLXNA4	BMP7
JAKMIP1	SCN4B
MT1G	VWA2
BEND4	GPR126
TBXAS1	PLCH2
HPR	TMEM255A
SPAG6	FGFR3
PCAT18	FHL1
TFF1	COL4A5
PKNOX2	AREG
KLK1	MCIDAS
ZYG11A	TEPP
CLDN3	C10orf99
TAC1	RNASE7
HMGCS2	ARHGAP23
SH3GL2	FOXE1
HIST1H1T	DFNA5
CHRM1	AMIGO2
SLC6A14	PDE1C
ZFP42	GJB3
SLC5A1	UGT8
SHISA9	C2orf88
SLC15A1	FAM43B
CYP2A6	ITPRIPL1
CALN1	MMP21
TRPV6	SOX15
LOC283177	ANO1
C5orf46	ADAD2
HS6ST3	CCNJL
ELOVL2	IGFBP4
KCNK3	ARTN
PTN	DUSP7
TMSB15A	PPP1R14C
LRRC31	LY6G6C
AZGP1P1	SLC38A5
RTN1	ETV5
SLC29A4	CALML3-AS1
C2orf72	LDLRAD2
PAH	CDHR3
ARHGEF38	LGALS7B
SOCS2-AS1	C1orf145
EPHA5	SPOCD1
BPIFB2	PDZD2
PLD5	FLNA
MUC12	RNVU1-20
ANKRD24	NYAP1
RAMP1	CYP2C8
MUC13	TGFB1I1
CFB	RBMS3-AS3
APOB	KCNH3
NCMAP	CELSR2
DNAJC12	COL5A1
LCP1	MDH1B
AGXT	PLEKHG5
C6orf222	SOSTDC1
AGT	LPCAT2
PBOV1	SNORD17
PPP1R1A	CNIH2
VLDLR-AS1	GAS6-AS2
MESP1	DUSP9
FAM177B	CCDC78
KIAA1324	COL27A1
LOC102723649	C11orf45
KIF1A	SULT1A1
LOC100506585	CD1D
F13A1	MAMDC2
SYT7	PDCD1LG2
MOGAT2	LRIG3
RAX	ISM1
ABCC6	PADI1
BMPR1B	GALNT14
CHL1	SMIM6
C10orf107	WNT16
SOWAHA	CXorf57
ELOVL2-AS1	JAG2
PPM1E	NT5DC2
POTEH-AS1	RAPGEFL1
SLC34A2	DSCAML1
OAZ3	DRD1
HIST1H2AI	GAL3ST4
FAM3B	FGFR2
CLGN	SLC4A9
UPK3A	PPP2R2B
TSPAN8	UHRF1
UPP2	ST6GALNAC4
TMC5	MEG9
CYP8B1	SCN2B
AMER2	C11orf70
SLC12A1	QPRT
RND1	DLL3
EPHA10	IL22RA1
TRIM36	DOK7
CCIN	EFNB1
VSTM2L	PTTG1
UNC80	SSTR5
ACTBL2	PAK6
CASP5	PRICKLE1
DCAF12L2	SDC1
SLC5A8	HR
DTNA	ZNF219
RAB6C-AS1	PIANP
GPR37	LOC102724927
MT3	C11orf53
LOC286189	KREMEN2
DNMBP-AS1	CALML3
CPE	MID1
FGF13	GPBAR1
CRAT	HBEGF
PTPRD	MYL9
LINC01351	TPM2
GREB1L	CHST4
C2	RAET1E
TOX3	C15orf59
PPP1R9A	CAV2
FAM222A	STAC
KLK12	ZNF492
MT1F	ZBTB7C
RAB3B	RIN1
OR3A2	AEBP1
PGBD5	PROCR
ZBP1	KLHL10
TYRP1	DQX1
ANO7	C1orf233
PCDHA11	GPR87
GREB1	EFEMP2
ALPK2	MAP7D3
VNN1	FABP5
TFF3	MEIS2
RIMS2	GPD1
PPM1H	CTSC
SGCD	TMEM74
PGC	SPACA6P-AS
RHOU	TRIP6
MT1M	ARHGEF28
SCGB2A1	CCDC85B
MAF	SV2A
KRT81	KIRREL
PART1	FAM19A3
IL17C	TSNAXIP1
PLA2G7	HELLS
LOC101927657	CLIP2
FAR2P1	NLGN4X
TSHZ2	ITGA6
PCDHA12	FERMT1
CP	KCNC4-AS1
DNAH5	KLHL13
ZNF350-AS1	SEMA3F
GHRHR	LOC100506127
ZIC1	UPK3B
GLYATL1	INPP5D
NTNG2	DSC3
KIF5C	FANCA
SAA2	KCNE2
PCDHA13	PITX1
TMPRSS2	BEST4
LINC01213	BDNF
SCIN	KCTD17
SAT1	EFNB3
DLGAP1	EFEMP1
LMX1B	PSRC1
SPOCK1	ADM5
LINC01207	MIR100HG
RASEF	LTB4R2
SHISA3	CPS1
PLEKHS1	AKR1B1
PTPRN2	GPC1
FAM3D	PVRIG2P
ACKR2	GAS6
SYT14	ADAM8
PDZK1IP1	UPP1
GLOD5	CAPN3
CFTR	CAPN14
LIPH	FKBP10
PDE11A	LOC400867
CACNA1H	KCNK7
SERPINB4	NRM
LINC00853	GLIS2
ARHGAP36	NTN3
RHOXF1	STON2
SERHL2	TRO
SLC1A2	PVRL1
SHISA6	MYO18A
LOC152225	TLR6
RGS17	TTBK1
FEV	SYNPO
WT1-AS	FAM228A
LOC101927495	CKMT1B
B3GAT1	MSTN
SEMA3E	CYP27C1
SLC44A4	MAPKBP1
LINC01480	RPS2P32
TXNDC16	SLC9A4
RIMS1	F3
SERPINB11	CNTNAP3
FRMPD3	PAQR7
FNIP2	RGS9
CECR2	PPP1R1C
UPK1A	P2RY11
ELFN2	GPR56
SORD	LINC00673
BEAN1	PDE5A
LDLRAD1	C16orf59
ARHGAP6	LANCL3
ACOXL	GJC2
SRD5A3	CAP2
TGFB3	STARD5
PDE8B	PDLIM7
MMP7	PLCL2
GLRX	LINC00683
HIST1H2AE	LOC284837
KCNN2	LOC101928381
GDF15	C3orf67
KRT37	LAYN
TUSC8	NPW
ROR1-AS1	TGFB1
SFMBT2	C6orf25
C22orf42	SCARNA12
NXPH4	NFE2L3
LINC00668	CDH22
SAMD11	SAMD5
FOXI3	JPH2
C1orf168	MLKL
C8orf4	MFGE8
IDH2	LOC100506990
DLG3-AS1	PFKM
VLDLR	ABLIM1
SLC45A3	C20orf27
HCN2	HLF
GK	SSTR5-AS1
CHI3L2	CLCN2
LOC100129175	RNF207
IHH	CELF5
LRRN4	SEMA3C
PLA2G2F	SDR16C5
DIO1	VHLL
CITED1	LPAR5
LINGO4	CHTF18
ZIC2	STOM
CATSPERB	ZNF512B
ACSL6	GSTP1
LURAP1L	CENPK
GPR98	GPSM2
PRR15L	LOC101929066
DUXAP10	IL16
KIF12	ANTXR1
ACADL	CCER2
MME	GCK
GFPT2	PKP2
DHDH	SH3RF2
DMGDH	SSH1
CCL8	GLI1
HIST1H3H	IGSF9
RDH10	ARHGEF40
FAM19A4	ITGB6
TMEM56	AGPAT4
LINC00342	EPB41L2
GLB1L3	TMEM237
ATP10A	TMIE
GNMT	FAM87A
ABAT	DSE
TM4SF1-AS1	CITED4
SYTL2	TMEM19
SIDT1	SGK1
RGS18	TMPRSS6
STS	PARD6G
GPR64	TROAP
MB	LINC00675
PTPRD-AS1	KIAA1161
FAM47E-STBD1	PLSCR3
MYO16	LTB4R
S100P	PPIAL4D
COLEC12	PPIAL4E
ANGPTL4	PPIAL4F
GRIN1	TUBA4A
NCAM2	ARNTL2
PLSCR2	PITPNM3
CYP21A1P	CORO6
CRYBA2	FGF17
ZG16B	TUBB
HIST1H2BC	CACNB1
CATIP-AS2	LOC100507437
STYK1	EPPK1
TMOD1	BCL11B
SLC26A4-AS1	DGKG
DUOXA2	OAF
CRYAB	PHC1
LOC100505938	ANKRD13B
CTB-178M22.2	TEKT3
PROM1	TMEM173
CHRNA7	SIK1
LINC00930	TREX2
PLA2G4D	ACOT7
EPHX2	GLS2
GK3P	HSPA4L
WFDC12	FEZ1
SLC9A9	PRSS27
FAM105A	ADAM22
SERPINB7	DNAH2
NXPE1	SLC2A9
BHLHA15	TBX6
GALNT15	DTL
GPR160	CCDC84
RSPH1	PHLDB1
TP53INP1	HAGHL
SERHL	SLCO3A1
ST8SIA6	ARHGDIB
SLC51A	DLL1
ARHGEF37	RAD54L
LRRC4	GLI3
PRLR	SLC22A13
RORC	PPEF1
NOV	GOLGA8A
CCDC108	DUSP4
SLC2A12	C19orf57
THBS4	RFX2
GOLM1	CKMT1A
TTYH1	MCC
HIST1H2BF	ACTA2
SLC35F1	TONSL
BAALC	SH3TC1
UCA1	CHCHD6
VNN3	MCM2
HIST1H2BD	EPHA2
LOC102723766	TULP1
ARRDC4	RERG
EBF2	PLCD3
FFAR4	ETS2
ABCA4	EHD2
RCAN3AS	INPP1
DRAXIN	PTAFR
ST8SIA1	PINLYP
WFDC3	KCNC4
NPTX2	PPARGC1B
CLUL1	MAFG-AS1
VGLL3	CLYBL
CAPN5	LOC100507420
SMAD9	TSPAN4
RGS11	KCNAB2
CREB3L3	DUOX1
CCDC67	NEURL1
SAA1	C17orf47
METTL24	SUGCT
DYNLRB2	F12
BANK1	NACAD
HIST1H2AC	EHBP1L1
LPO	NXN
RPS4Y2	REC8
NAALADL2	LINC00672
CD4	CDCA4
LOC102724539	WDR66
CCDC176	CCDC28B
EEF1DP3	PLEK2
TRPC5OS	PIF1
LOC101928248	HS6ST2
DAB1	RELT
PKIB	LINC00896
HIVEP3	SLC22A20
GJB1	CLCN1
LOC101928358	LOXL1
TTC39A	PLA2G4E
SMIM24	MST1R
FAM47E	LINC00965
ANK1	GNB1L
ZNF233	LOC401127
AGR2	EXT1
LOC100506082	GINS1
ABCC4	BOLA3-AS1
RAB27B	SYNGAP1
SHISA8	MPZL2
RIMKLA	PORCN
LINC00323	FLT3LG
GPR137C	PANO
RHPN2	ZBTB12
ACSM1	DLEU1
SYTL5	ITGA3
NATD1	CLSTN2
MIR155HG	PARPBP
LOC283194	WDR76
KLF17	CYSRT1
CXADRP2	PLXNA1
SECTM1	HOMER3
POPDC3	LYPD6
PRSS3	MBNL1-AS1
LINC01135	LOC283140
MKX	NCKAP5L
SMCO4	MIMT1
MLPH	ARL2
KCNB1	NT5M
GRID1	AK1
ZCCHC24	KIAA0895L
ADRB1	SMKR1
HIST1H3E	ZDHHC8
KLF15	SKA2
DIRAS2	RABEPK
CYP2G1P	RTEL1
C11orf52	LLGL1
NXPE2	TMEM45A
SOCS2	CORO1A
AMOT	VDR
SIAE	DNM1
TSC22D3	FAM216A
HIST1H1B	SLC4A11
DCDC2C	RUSC1-AS1
LOC100129924	SNAI2
SNTB1	INPP5F
RNF144B	FAM64A
FCGR1B	MIR4697HG
ADCY2	BMP1
CRLS1	HOXA7
FAM124A	PRR22
PYDC1	ADAP1
LOC101929224	LOC653786
ABHD1	CCDC102A
C4orf6	TIAM1
MCM8-AS1	MICALL1
LOC283575	ROGDI
GADD45B	ANKLE1
LINC00925	NAT14
TCERG1L-AS1	RARG
EFNA1	ANKK1
C9orf106	PLCG1
HIST2H2AA3	FAM92A1
HIST2H2AA4	ST6GALNAC6
ARG1	REEP4
CD36	PLCB3
ANG	PKM
WNK4	KLF8
RNASE4	FOXQ1
C1QTNF9B	KLHL29
SPATA13	CNN2
SLC28A3	SLC1A3
RASGEF1B	CNTF
ZNF610	TSKU
NTM	ARHGEF2
EMB	MYADM
MC5R	SLC39A4
LOC100287072	DNMT1
GJC3	SLC39A13
DHRS7	KCNQ4
SLC27A2	FAM156A
HIST1H2BG	POLR3G
WBSCR17	ABCC10
LOC101927911	ADCY3
COCH	LAD1
FOXP2	EPHB4
LOC102723320	EME2
TMEM132B	CAMKK1
SERPINA1	C9orf3
PROX1	PKI55
C2CD4C	LOC642846
LINC00160	TM7SF3
SOD3	EVPL
GUCY1A3	ROBO3
PCDHGA5	PKMYT1
NDP	STX16-NPEPL1
ZNF528-AS1	ORAI1
AUH	NUDT1
NAT1	PRR3
HIST1H1E	ARL10
ASTN2	ROBO1
RBPMS-AS1	SMG1P7
SLC4A4	ETS1
MGST1	DFNB59
GLIS3	ASAP2
RBP4	PSMC3IP
LIMCH1	CEP78
MESP2	PPT2
IQCD	UBE2T
SLC15A2	CC2D2A
WWC1	LRRC39
PCSK1N	DNAJC18
SHROOM3	DDX12P
GRPR	DDX26B
TMEM92-AS1	SYK
HSD17B6	RPS6KA4
FCAR	HAUS5
PCDHA6	PLXNB1
DNAH9	RASA4CP
SLC43A1	RANBP1
ACADSB	INHA
NAAA	PHYHD1
EMBP1	LIG1
GALC	B3GNTL1
SLC9A7P1	RBL1
POTEF	STAG3L5P-PVRIG2P-PILRB
RHOV	FAM53B
UTS2	FCHSD2
THRSP	RHBDF2
NAMPT	TIMP4
BAGE5	RUVBL1
BAGE4	SIRPA
TC2N	LAPTM4B
IGSF21	NLGN4Y
NWD1	PRAF2
ELOVL7	MIR17HG
PACRG	KLHL31
CCDC183	SLX1A-SULT1A3
GCKR	SLX1B-SULT1A4
STOML3	PRDM5
RAB6C	GSTM4
HPN-AS1	TRPC1
LRRC10B	TUBB4B
LONRF2	CCDC51
BEST1	GPR125
TPD52	HSF2BP
MROH5	C17orf67
SLC52A3	SLC2A4RG
KPNA7	CARD10
SYT9	PFAS
ENPP1	ANKRD29
HIST2H4A	MAP3K6
HIST2H4B	LOC284454
TMEM178B	SPATA25
SFTPD	HRAS
MYO5B	MEST
C4BPA	GBAP1
COL22A1	CAD
2015-03-03	PODNL1
ZNF217	ZNF276
CASP10	ADAT2
PDE10A	SLC25A25-AS1
PLAC4	ANO9
SLC3A1	PIAS3
GPR37L1	RPGRIP1L
SEPP1	MSH5-SAPCD1
FLJ20021	C5orf66
SERPINB3	PRIM1
ZDHHC14	POLD1
TRPM8	PKIA
EXPH5	BLCAP
WTH3DI	NUDT6
FLJ22447	PDE6B
NFIL3	GPR27
PRSS8	PLEKHG4B
KIAA1257	CRMP1
MZB1	LIME1
MUC3A	FRS3
COBL	STMN3
XBP1	ITGB7
MYEF2	PLCE1
VSIG2	MAMDC4
TMEM136	FAM83H
CAND1.11	LOXL3
PDE3B	KNTC1
LOC101926889	TMEM25
STC2	LINC00852
PIPOX	DMKN
SLC18A2	TMEM221
HIST1H4E	TPX2
CD274	TNS3
SPOCK3	LDHB
SYT16	LCAT
ZMYND15	MXRA8
SLC2A10	FAM83B
FADS2	SULT1A3
CPQ	SULT1A4
WFDC10B	NPHP1
NEBL	RBBP8
PKHD1	PLEKHG4
SLC35F3	LYPD6B
WDR93	LRP8
FNDC4	KIAA1377
COL9A2	UBASH3B
FAM84A	PRMT1
KRT20	SLC22A18AS
LOC100506076	DGKA
FLJ42969	SLC25A12
GLIPR2	AGER
PLOD2	KLLN
REEP6	SOWAHC
RPRD1B	PRELID2
CPM	VWA7
FHDC1	KAT2A
SLC5A5	TYMS
BICC1	TRIP13
PTP4A3	PAX8
CDKN1C	FUT8
PLEKHB1	GPRIN2
ST6GAL1	NDE1
RPS27L	LOC643387
HMGCS1	C14orf159
WIPI1	MOB3C
FLJ31356	MELK
FAM161B	COQ3
PLG	SKP2
MT1X	MBNL3
OPHN1	TBC1D2
YPEL2	DFFB
LOC102724163	SLC29A1
KIAA2022	C22orf23
ABHD2	PPP1R14B
CNTN3	SLC9A1
SLC13A3	MYL6B
ZMAT4	C8orf58
TTLL2	NABP2
LINC01208	MYLK4
SMIM14	PBK
C8orf34	FAM120C
ENPP4	LMNB2
LOC101927972	RAB34
TXNIP	S100A16
FAR2P2	ATXN7L2
PPP1R3B	MYH3
RNF103-CHMP3	GTF2H4
HIST1H1C	EFNA5
CLDN4	RNASEH2A
ENHO	TTC28-AS1
CRP	TAZ
ARHGEF26-AS1	FLYWCH1
STBD1	MYO19
HIST2H2BE	ABCC5
AMELX	DBN1
TLCD1	SUSD4
HPN	C1orf74
NNMT	IFT172
CYP39A1	LAGE3
LOC101927686	CCM2
INSIG1	BCL7C
PLEKHA6	PHTF2
ESRRG	BCR
PARM1	HNRNPA1
CIB1	UBE3D
BMF	PPFIBP1
ACSL1	POP5
ISG20	RGS12
KCNJ11	SCLT1
RAB17	SLC37A2
FMN1	GANC
BCAS1	TSHZ3
LNX1-AS2	CCDC138
CCDC28A	NDRG4
LOC101929125	TAF1A
FAM19A5	EWSR1
BOK-AS1	GPRC5B
HSD17B11	BCS1L
ERBB3	FOXRED2
OCLN	DOK4
HP	CAMTA2
CD24	GOLGA8B
ZNF229	TUBA8
NSUN7	HNRNPA1P10
STIL	BLMH
C19orf81	PRTFDC1
TGM2	MRPL12
NCOA7	TBCB
TIMP1	XRCC3
LOC101928674	TANGO6
LOC154761	EEF1B2
SPDEF	SAMD1
FAM174B	CCNB3
TMEM254	LHFP
TSC22D1	C9orf142
KLHL24	LOC646471
NMUR1	SNRPF
CTH	RAP2C-AS1
INHBB	FASTKD1
ENTPD3	PXN
SLC30A4	LINC00310
TNFRSF19	MEX3A
RASGRP1	C1QBP
IDH1-AS1	FAM161A
DARS-AS1	USP18
KIF13B	NPTN-IT1
KCNS3	COPZ2
DHCR24	PTOV1-AS2
SLC26A5	EXTL2
SEC11C	NPM3
HK2	DPP9
ABCA1	MTMR11
POTEJ	TMLHE
RHOBTB3	GPSM3
KIAA1244	SEMA4A
LUCAT1	GTPBP3
DEPTOR	GALE
NUPR1	PTPN14
ARFGAP3	RHOD
TTLL7	GNRHR2
ZBTB10	MPHOSPH6
IL1R1	GDPD3
CTBS	TMEM191A
BIK	SPATA33
HIST1H2BN	FBF1
MFSD6L	TMEM201
SAA4	SFR1
B3GNT7	C16orf95
ZNF532	LINC00936
MGC12916	FAM53A
SOAT1	MAMSTR
LOC113230	BARX2
LOC102724552	LYPD3
RRAGD	ACY1
ZDHHC9	LOC400684
NOS1AP	ADCY9
ALDH1A3	SYNC
FADS1	PPP4R1
RASD1	LSM2
APBA2	2015-09-08
ZNF350	ASMTL-AS1
HIST1H2AD	PRR12
PNKD	RFC4
PPAP2A	MX1
DSC2	TRMT1
CHRM4	SPRED3
TMEM165	LOC100506472
PMEPA1	LYNX1
DCDC2	NRIP3
FOXA3	NHS
TDRKH	C15orf41
CDKN3	CARS2
ZNF404	GLI4
CYP27A1	GSG2
CDK19	SERP2
ACSM3	VARS2
TSPAN15	PRICKLE3
LOC101927221	DCAF15
DUOX2	LETM2
BRINP3	ZHX1
CREB3L1	LOC101927021
LINC01006	CHRNB1
TMEM220	PEMT
ASB5	FAM83H-AS1
SCARB2	HIRIP3
2015-09-03	NCS1
PDE4B	UNC93B1
KLHL30	ZNF251
TEX15	B3GALNT1
APOO	ERCC1
PNRC1	ATP5J2-PTCD1
PARD3B	ACSL4
SH3BP4	METAP1D
ZHX2	KAZN
ARRDC3	HNRNPA3
EFCAB6	KBTBD6
HERC5	STX10
SIPA1L2	ZYX
OLFML2B	ASB1
FBP1	LEPREL4
C17orf78	SHMT1
CDYL2	TUBG1
MEIS3	IGSF9B
CCPG1	BREA2
NAP1L6	TKT
ERO1L	LFNG
LOC100507530	CAPN1
C1QTNF9B-AS1	BZRAP1-AS1
TSPAN1	CALM3
SOD2	ARHGAP1
TRAFD1	GATB
CKB	CD101
LAMTOR5-AS1	FAM66D
RNF183	DEF6
SLC2A5	FAM189B
MAP1LC3A	NT5C
LGMN	SLC5A6
LOC102723927	STAG3L5P
RBM47	PDGFA
RHOQ	CSTF2
LOC101929679	LINC00926
NANS	HARS
POTEI	WDR62
STX17-AS1	NDN
BSPRY	RPL22L1
RDH11	IQCH-AS1
NKX3-1	RILPL1
RUNDC3A	PTPRU
RCAN3	METTL17
ACAD8	SLC29A2
RASGEF1A	CTBP1-AS2
PFKFB2	LOC100506083
SYBU	HNRNPM
ZNF615	WDHD1
ZNF528	C11orf73
ALDH6A1	PROSER3
HIST1H2BK	UVSSA
PARK2	CHCHD10
PPP2R2C	TARBP1
SMPDL3A	ATP6V1G2-DDX39B
STEAP2	LINC00998
CTSF	HIC2
WTAP	LRFN4
BNIP3L	C19orf54
HNF4G	MRPL4
SYT13	GRK4
CDC42EP5	TP53I13
KIAA1958	NSUN5P1
TTC39B	RINL
NCAPH	UQCRHL
NEK6	SARS2
SYTL4	HMBS
IMPA2	PRKX
ALDH1L2	GDF11
GMDS	WDR35
LOC100287846	ARHGAP11A
PPP3CA	SLC25A10
ENOX1	TBC1D3F
F2RL1	BAK1
TMEM220-AS1	AMER1
ALCAM	FAM41C
TENM4	LNP1
CCDC125	TPST2
ASPHD1	ATP2B1
AK4	BRI3BP
DEFB1	SLC44A2
RASL11A	ANKRD61
DNALI1	ATAD5
ENPP5	MTBP
ELL2	TRABD
RASSF9	EHMT2
PLSCR1	RABGGTA
TNFRSF11A	EDARADD
PIK3IP1	ZC3H12B
KCNK13	CHEK1
ENTPD5	ILF3
RPA3OS	PCBP4
RNF24	KLHL17
SLITRK4	PPP2R3B
CTXN1	MTAP
ASAP3	ZNF205
FMO5	KCTD1
ARHGAP44	LOC100630918
P4HA1	TPI1P2
KLRC1	YIF1B
PKDCC	SCAP
LOC728323	ARRB2
FZD5	TMEM147-AS1
MED12L	HSPBP1
PAIP2B	SLC27A5
KLK11	PIP4K2B
PEX11A	RBM38
RALGAPA2	HNRNPA2B1
PTGES3L-AARSD1	KCNIP2
NIPAL2	PLP2
PBLD	XYLB
MSMO1	ERF
LOC100505715	SPG7
APH1B	STAMBPL1
BAIAP2L1	NFRKB
GMPR	VASP
PRSS22	EEFSEC
DUSP16	LRFN3
SOX9	TFAP2A
CACNA2D1	ZNF34
CHAC1	CBX3P2
SUGT1P3	FTCDNL1
SLC23A1	BOLA3
LOC102723729	TLDC1
YIPF1	NAT6
LOC100506985	TCP11L1
PVRL4	KRI1
FRMD4B	GAPDHS
CLDN2	FOXRED1
PTGR1	SCNN1D
NOTCH2NL	ACER3
FAM155B	NDUFV1
SHROOM1	ZNF514
ITPR1	DSCC1
2015-09-05	AHNAK2
SHC2	VARS
PSORS1C1	CDCA5
FAM69A	ZNF321P
CCNG2	TMEM246
TSTD1	TNK2
RTP4	DOPEY1
DDIT4L	LOC102724814
TNFSF10	TAF15
DMRTC1	TRAP1
DMRTC1B	BICD2
CMPK1	PTCD2
ADAM9	AGPAT1
IL17RC	RQCD1
GUCY1B3	HNRNPA1L2
CPD	FAM86JP
LGALS3	GIGYF1
TMEM59	SGK494
LINC00963	RACGAP1
FAM132B	FAM86C2P
CCDC159	MTMR4
GALNT7	LOC101929441
EPB41L4B	FIBP
JMY	STK17A
BRSK2	ERVK13-1
PCDHA4	HCFC1R1
MAL2	ARHGEF1
LBH	FARS2
FRK	KIF11
NDUFV2	UCKL1
LRG1	PA2G4
CECR6	SLC35G1
HERC3	BRD9
LOC100129034	DBNL
SMPDL3B	ZC3H4
ELOVL4	LMNA
METTL9	TELO2
CPEB4	NME2
CGN	NAP1L1
TRIQK	ACTRT3
APOL6	CENPO
VIPR1	TMEM110
CCNT2-AS1	SRSF3
BACE2	HPCAL1
SLC22A4	HOXA10-AS
TCERG1L	OSGEPL1
PACSIN2	CEP164
FSTL1	IFT80
CTSO	PRMT7
RNF103	FAH
PCDHA10	SNRPA
C19orf18	ZNF337
RAB11FIP1	TRIM41
FBXL16	TP73-AS1
CCDC152	MAGEF1
GABARAPL1	SERPINH1
PTGES3L	TYW3
SLC37A1	NBEAL2
RASD2	CETN3
SARAF	MRPL11
YPEL1	ZNF747
NPNT	DGKZ
PLGRKT	TRIM59
KLHL23	ATRIP
MYB	SLC25A30
DBNDD1	AMZ2
FLJ22184	CDKN2AIPNL
TBC1D8B	ARPC2
C8orf44-SGK3	THRIL
MT2A	RAD51D
ABHD3	GGH
GCNT3	SAMD10
BCL6	CMTM7
C1orf226	SAC3D1
CASP4	PMS2P5
RAP1GAP	MCM3AP-AS1
RAB27A	RELL2
EPDR1	FBL
LINC01137	ALDH16A1
SCD	DNAH3
DNAJC25-GNG10	MRRF
HIF1A	IMPDH2
TMEM140	FGD1
LOC728730	GAPDH
CPEB3	C9orf89
GPM6B	MCM6
CERS4	DUS2
ADAM10	CNKSR2
SLC25A45	HMGN4
PRR15	MKNK1
GALNT4	ATP2A2
CBS	AARS2
HEATR5A	TSEN54
EAF2	C22orf46
HSD17B4	LOC284023
IQGAP2	PJA1
HBP1	FDXR
SCUBE3	TYSND1
FBXO36	AMPD2
GPD1L	THBS3
ZNF419	RTTN
CCDC64B	KIFC3
SLC43A2	PABPN1
TLE1	FCHSD1
SERPINB9P1	PHB2
B2M	TPCN2
METTL21B	LIAS
FAM151B	HMCES
EP300-AS1	USP27X-AS1
FAM63B	TNPO2
PPFIA4	ZNF580
CCDC136	SPATS2
TMEM38B	AAAS
BPGM	ZNRF1
KCND2	NME7
BNIP3	GEMIN6
SDSL	TAMM41
CD99	TCOF1
LOC81691	THOP1
CARHSP1	LPIN3
LMO7	AHSA2
AMD1	SLC23A3
LOC100507140	SLC41A3
LOC101927391	SLC25A15
SERPINB6	MRPS28
RAB8B	GPR75-ASB3
OR7D2	CEP85
TRAPPC6A	TSPYL4
GDE1	DUS3L
C3orf14	NEURL4
LCORL	PACS2
TMEM125	HEATR2
PHKG2	FAM86C1
GPRC5A	ARMCX2
CST3	PCNT
MMD	BCAT2
VIM-AS1	C1orf86
LOC101928118	WTIP
BLOC1S5	SUPT3H
SEZ6L2	CCDC14
SYCE3	ADORA2B
WNT5A	SLC25A5-AS1
NBEA	ZNF771
ABHD17C	TOP1MT
COL26A1	CCDC120
PRKAA2	MSH5
HOMER2	PMVK
ICA1	CHRNA5
BIRC3	ZRANB2
SORBS2	NEK1
CRADD	C17orf89
SMIM2-AS1	SRSF2
GCC2	MYO1B
PFKFB4	MRPL28
DPY19L2P3	NUDT3
TBC1D8	CENPT
WBSCR27	IPO5P1
HES4	SLC12A4
SPINT1	ATP5D
RWDD2A	TSSC1
SECISBP2L	LOC257396
HELB	PANK1
CHD2	FAM169A
GPT2	TMEM246-AS1
LIFR	UBAC1
MYLIP	METTL8
BACH1	PAGR1
CCNG1	TRIM32
APPL2	TRAF2
NOTCH2	CACNB3
FAXC	BRAT1
LOC101928063	C19orf68
ACBD5	TCP10L
CHST8	LOC101060321
STRADB	ZNF793
GPR143	RUSC1
KLHL41	KLF16
SLFN5	MAD1L1
PPAPDC2	SPDYE8P
LOC399815	POLR3D
TTLL1	TTC23
ARSD	LYRM7
MYCL	NPM1
TCP11L2	WDR12
ARHGAP26	ATP5B
RIPPLY3	COPS6
TTC9	BZW2
C11orf54	DCPS
ERICH6-AS1	MAT2A
LOC643355	CBX6
ZNF737	YBX1
ZNF227	KLC2
KCNH2	TJAP1
RNF213	R3HDM1
RAB43	ALKBH2
CREBL2	WDR75
STX18	TBL3
NEU1	C19orf70
FOXO3	VPS16
MALL	MRPL52
PTPRJ	GRIP1
CELF4	THNSL1
BCAP29	WNK3
ALB	CSE1L
ASAH1	KDM2B
RAB3IP	AKR7L
SC5D	NAA10
ANKRD42	AGAP3
KAT6B	PRKCQ-AS1
SLC50A1	POMGNT1
MARCKS	MPRIP
TWSG1	NCAPH2
2015-03-02	ZWINT
RFX3	GPR137
SLC31A1	TARBP2
ZFYVE1	MCM5
PDZD8	ALDH1B1
DHRS13	RUVBL2
ANXA1	PLEKHH3
TMEM106B	SSSCA1
RAB11B-AS1	PCNA
CXADR	C11orf24
ZNF844	FLJ37453
CCDC149	AGAP6
RPS6KA2	THAP7-AS1
ANKRD36	PAFAH1B3
RAP1GAP2	ARHGEF39
ANKRD36B	PIK3R2
MID2	PPIH
CACNG4	MTHFD1L
CDC37L1	NFS1
TTC30A	ZNF692
SEL1L3	MRPS25
MAP3K13	LGR4
CYP2B7P	SRF
DLG3	SLC26A1
LINC00324	MANBA
BTBD8	ZNRF3
NPAS2	PDCD2L
SLC25A16	FBXL19
ARIH2OS	TRIM65
TMEM192	C1orf174
SNRPN	TRAPPC1
MPZL3	DENND4B
DOPEY2	NEDD1
PLS1	GINS3
CA5B	SDCCAG3
RSPH3	PHF6
GATSL3	SIRT5
RGMB-AS1	GNPTAB
LOC102723373	CRYZL1
CGNL1	DAZAP1
XRN1	RHOT2
SOX4	LPXN
C1orf27	FAM173A
CITED2	STK25
AFMID	RCN2
SLC39A6	SSX2IP
TMED5	DGAT1
HID1	CDC37
FBXO25	STEAP3
HINT3	SLC10A3
C9orf91	PRR5
CCDC110	HNRNPDL
CHMP1B2P	MMACHC
CREBRF	CEP72
CRYL1	TNFRSF21
GUSB	TMEM216
ATAD2	CRIPAK
NBPF10	COMT
ROR2	SMYD2
MBP	IMMT
SAV1	ESRRA
ZBTB20	ZMYM3
SNURF	MRPS27
TFDP2	ACTL10
SGMS1	MYOM2
ATL1	MTA1
IL6ST	ANKRD16
MXI1	ANKS3
C1RL	RAD52
PPM1B	ZNF839
NIM1K	LOC100132215
PDIA5
TMEM41B
ZNF503-AS1
CYB561D2
VN1R1
TMEM30B
GNG10
RPEL1
LCOR
DMXL1
AR
SEPHS2
NBPF25P
TUBD1
PCMTD1
RPS6KA6
LRP11
C1orf167
DNAJC1
PLSCR4
ZSCAN2
WBP1L
NDUFV2-AS1
RB1CC1
FAAH2
LYN
ACSBG2
LIMD1
CAMK2D
SLC9A7
P2RX4
RBPMS2
RUFY3
FAM107B
ZNF606
LINC00263
LPP
ZNF772
ZNF704
FAM135A
GOLPH3
ATP2C2
SCAMP1-AS1
NEO1
SLC35A3
AGA
KDM3A
TM2D2
SH3BGRL2
ARHGEF26
TSPAN3
FNBP1
RGS10
CALCOCO1
ISPD
ZNF761
ATP6V1G1
CD46
PSAT1
IFNGR2
STIM1
GCNT1
NIPAL3
ZMAT3
SEC14L5
MOAP1
GPCPD1
LOC389765
H6PD
LAMP2
CNNM2
PARP11
FAM20C
LOC100862671
SLC25A21-AS1
GLB1L2
GDPGP1
AGTRAP
ZFHX3
SETD7
DNTTIP1
SPTSSA
PPAPDC1B
PIK3CB
LOC100506123
ZNF396
VWA1
FBXL20
BCL2L10
GALK1
UBE2E2
UAP1
PEX7
ANKRD12
UNC13B
TBC1D16
LINC01503
GALNT18
GOLPH3L
ZFAND2A
CAB39L
FGD4
CEP70
TBC1D1
ZNF630
FSIP1
TMC4
RNF5
PELI1
HMGCL
C1orf85
SLIT1
IER5L
IL13RA1
HLA-E
STXBP5
DHTKD1
LOC400863
MAP2K1
RAB11FIP4
CLDN7
ECHDC2
DGCR5
MAP6D1
NUDT11
TESK2
TMEM135
CMTM8
ILDR1
YPEL5
UGP2
RORA
ERGIC1
SAT2
DRAM2
MGC45922
TM9SF2
LRIG1
ANKRA2
GFPT1
PCCA
SRRM2-AS1
FAM96A
CLDN12
AIM1
STX3
PIN4P1
C15orf38-AP3S2
MMP24-AS1
LOC101930071
TIGD6
NECAB3
DDX60L
ZNF710
EHHADH
SQRDL
SAP30
FBXO42
CLPX
DNAJC25
ARL6IP1
GTF3C6
C7orf55-LUC7L2
C6orf57
GMNN
PARP8
FOXN3
HERPUD1
WBP2
LINC01128
MTHFR
WBP1
ZNF254
PGM2
MCCC1
RTN4RL1
ZNF626
HIGD1A
GSKIP
BBS12
NUDT9
GATA2-AS1
SLC11A2
CD164
2015-03-08
GKAP1
HOOK1
CASC4
LINC00847
NSF
PLEKHM3
C22orf39
AXIN2
TMEM56-RWDD3
SMS
ADCK3
CACFD1
NBR1
RASSF3
SNX25
TTC17
LPCAT1
ZNF432
PPP2R4
ZNF827
GAN
SERINC5
ERLEC1
HKR1
COMMD10
IPW
ZNF614
KIAA0319
UBN2
PPP1CB
ARHGEF3
PGM3
BID
CDS1
KAZALD1
ATP8A1
SLC35E1
GMNC
RNF145
MYO6
HEXB
GUCD1
BET1
CD47
IFT57
ZBTB38
NCOA2
DICER1
ZNF285
ANKRD10
NCOA4
NEK11
ZCCHC6
MKRN1
EPB41L5
FNBP1L
PRKAA1
ANKRD13A
PDCD4
ATP8B1
WDR45B
ATP1A1
MICAL1
SERINC1
ICK
GPR137B
AFTPH
LRRFIP2
FBXW11
CYP51A1
ZNF107
2015-03-05
C17orf58
ZNF420
HMGB2
PHF12
EEPD1
TMBIM4
PDXDC1
SPECC1
JUND
HPS3
HPX
PPM1A
DHRSX
NRL
C1orf198
ERO1LB
LOC100996447
RMND5A
HSBP1L1
AZI2
CFDP1
CMTM4
TOM1L1
LOC728752
WASL
FRAT2
TMEM51
SH3RF1
MIPOL1
POLR2M
LRRC8E
DIRAS1
SPG11
PPM1K
