# Supplementary figures and images for: GREB1 amplifies androgen receptor output in human prostate cancer and contributes to antiandrogen resistance
Source: eLife journal article supplement (doi:10.7554/elife.41913), 2019-01-14

**A** CWR22Pc-EP ARsig-lo  
*GREB1*

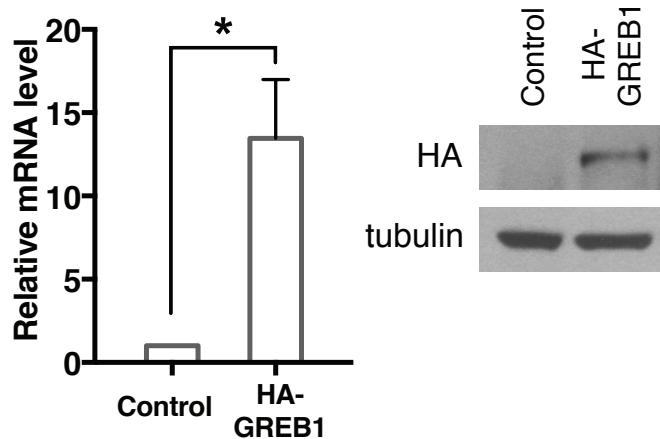

**B**

ARsig-lo-control  
ARsig-lo-HA-GREB1

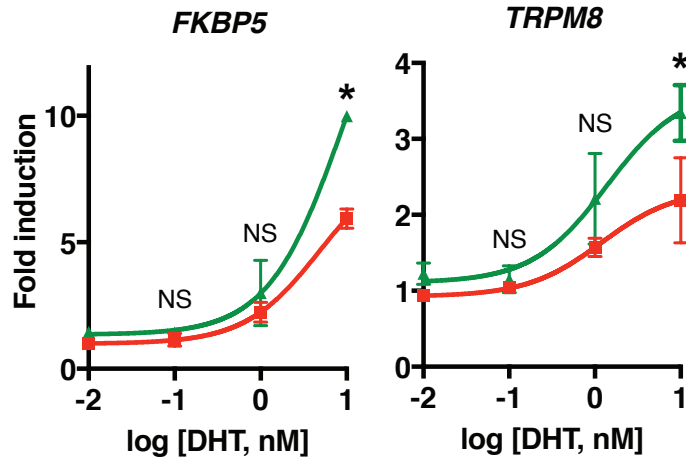

Supplement: supp [file elife-41913-supp-v1.zip]

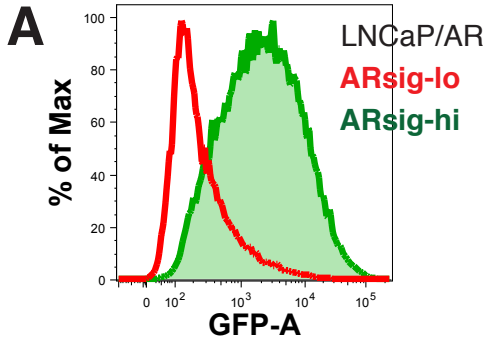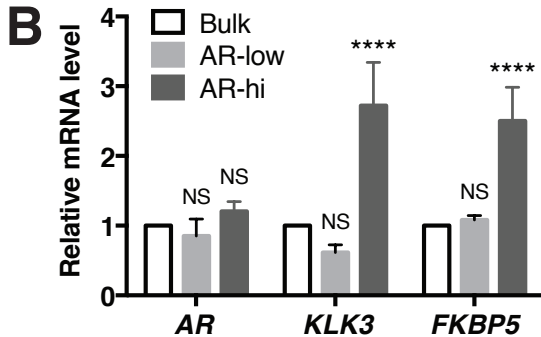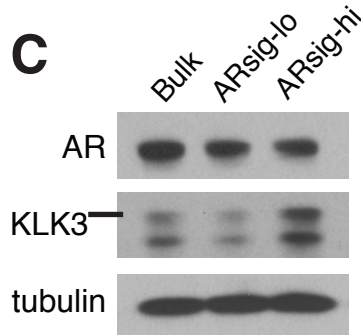

Supplement: supp [file elife-41913-supp-v1.zip]

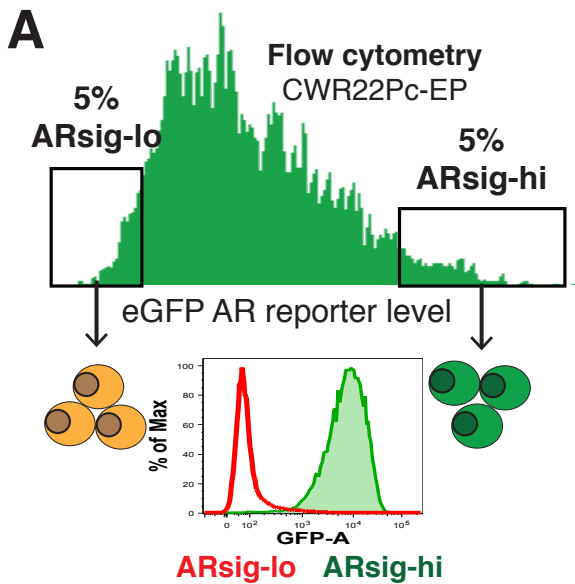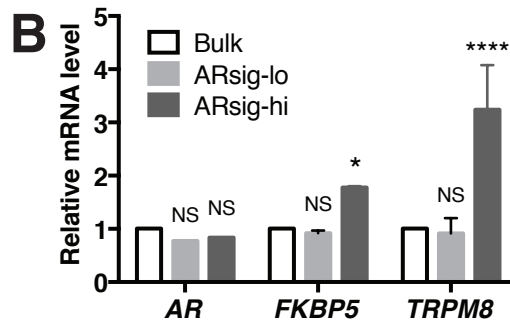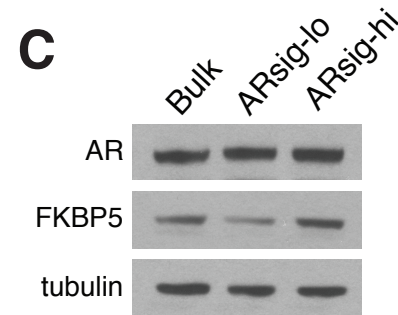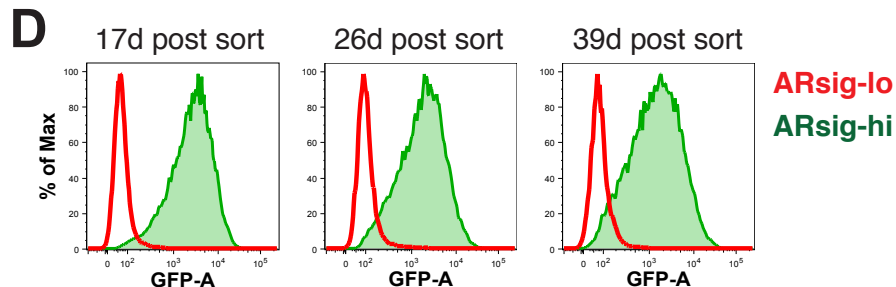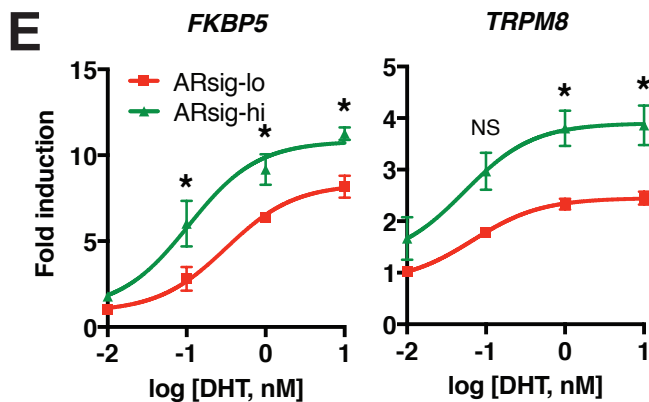

Supplement: supp [file elife-41913-supp-v1.zip]

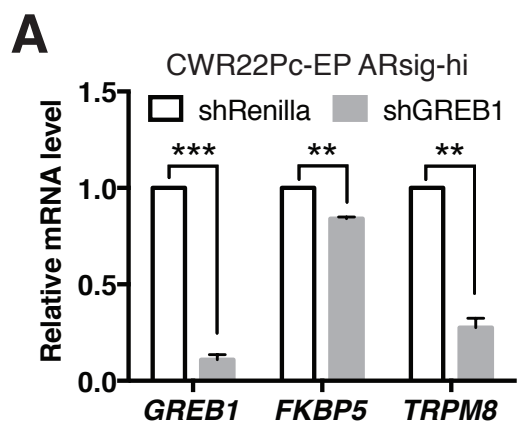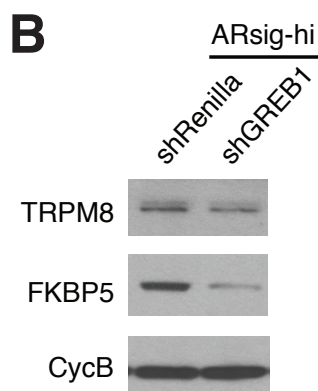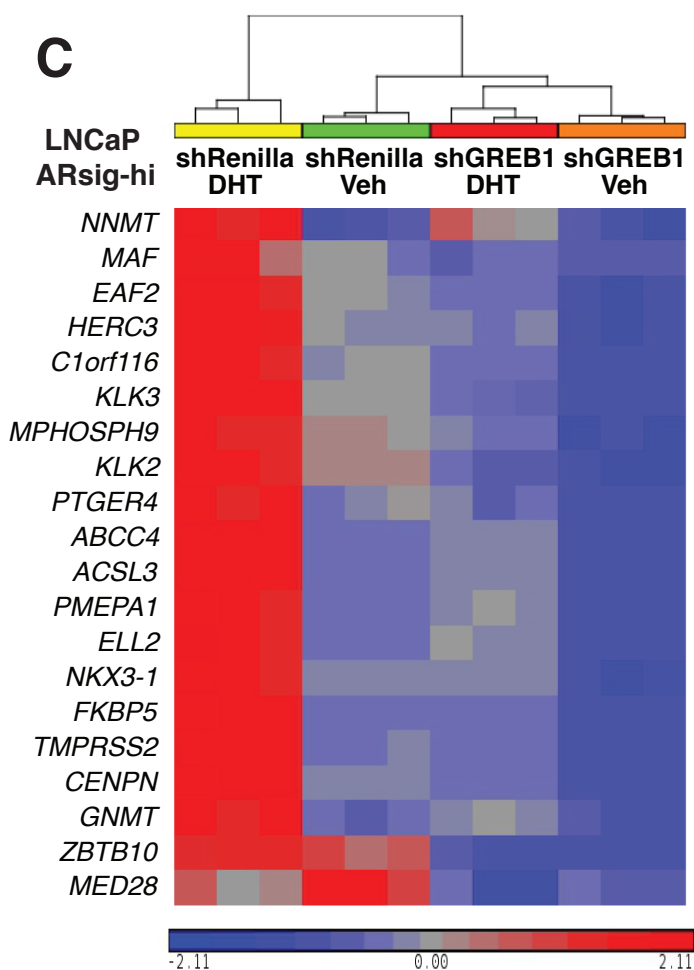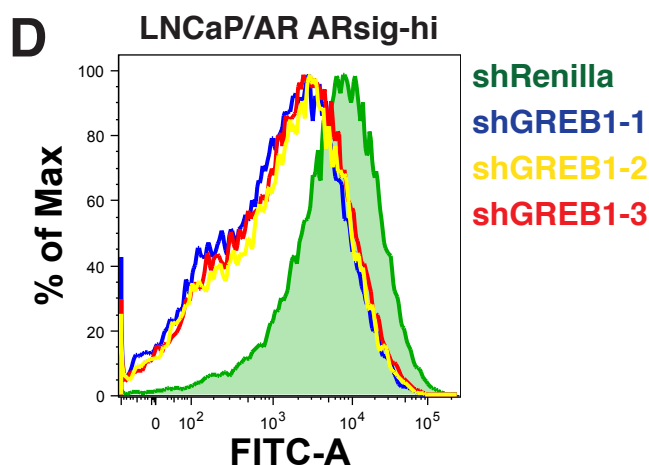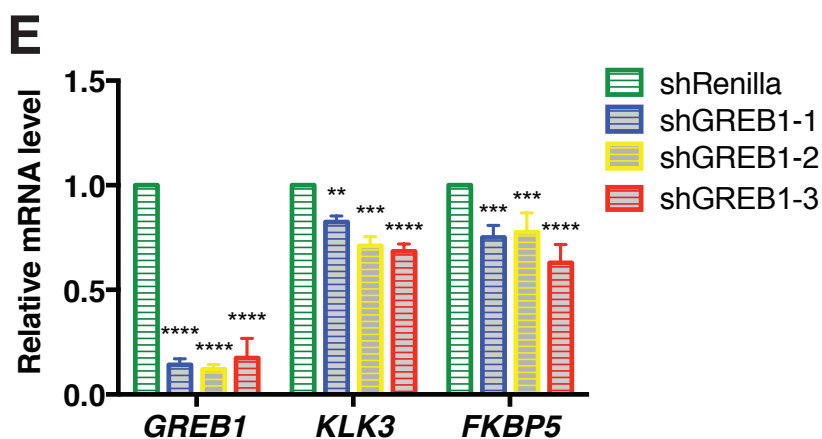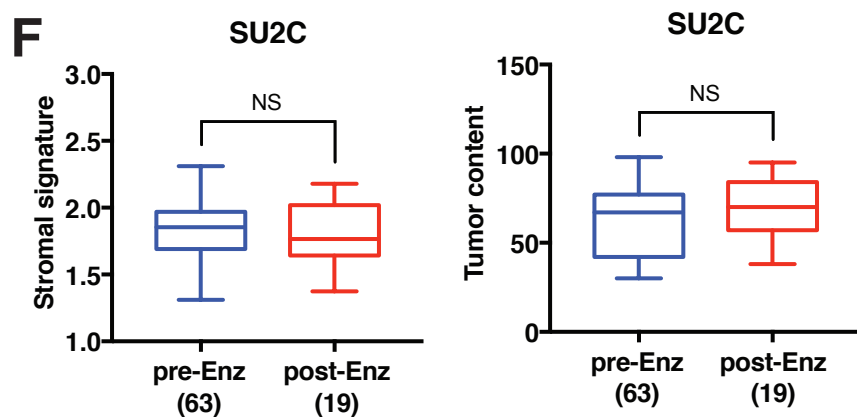

Supplement: supp [file elife-41913-supp-v1.zip]

**AR****KLK3****Patient 1**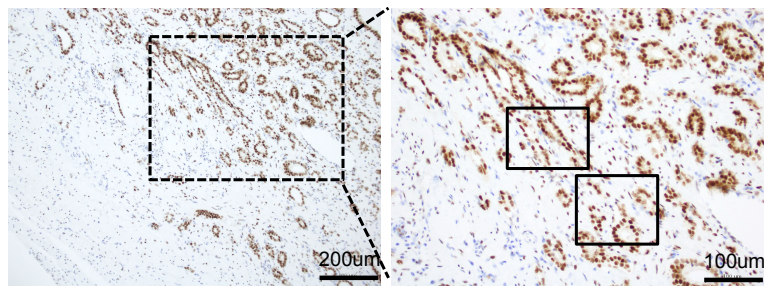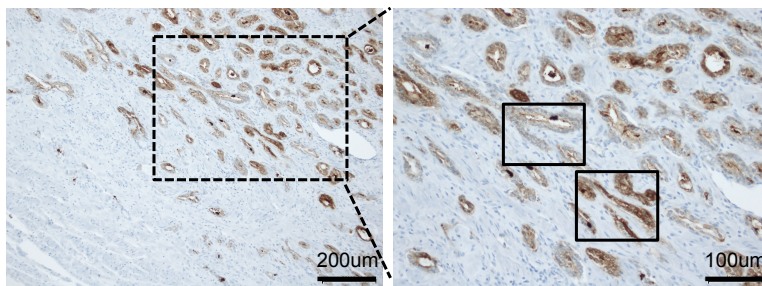**Patient 2**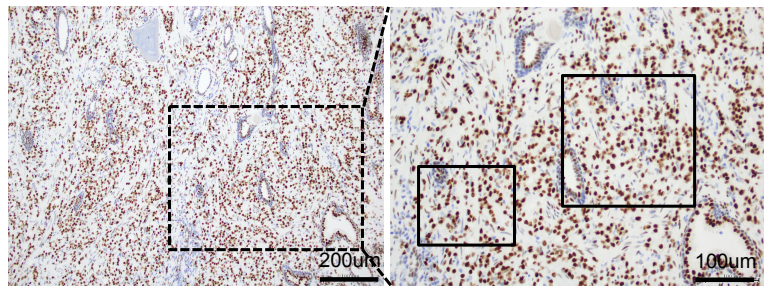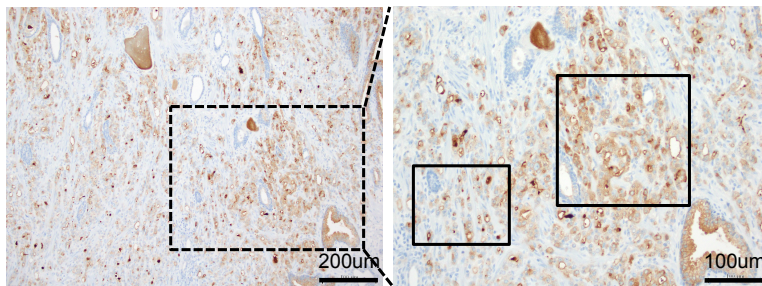**Patient 3**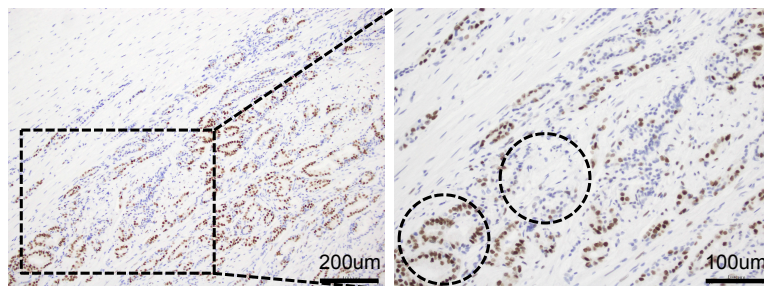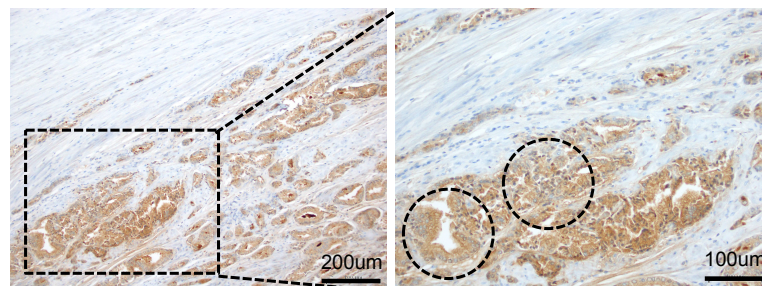

Supplement: supp [file elife-41913-supp-v1.zip]

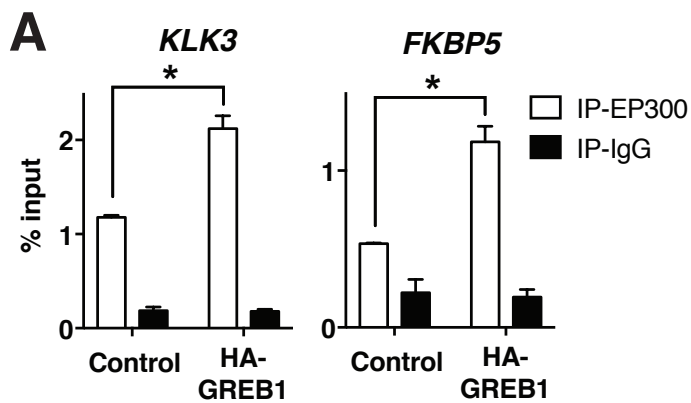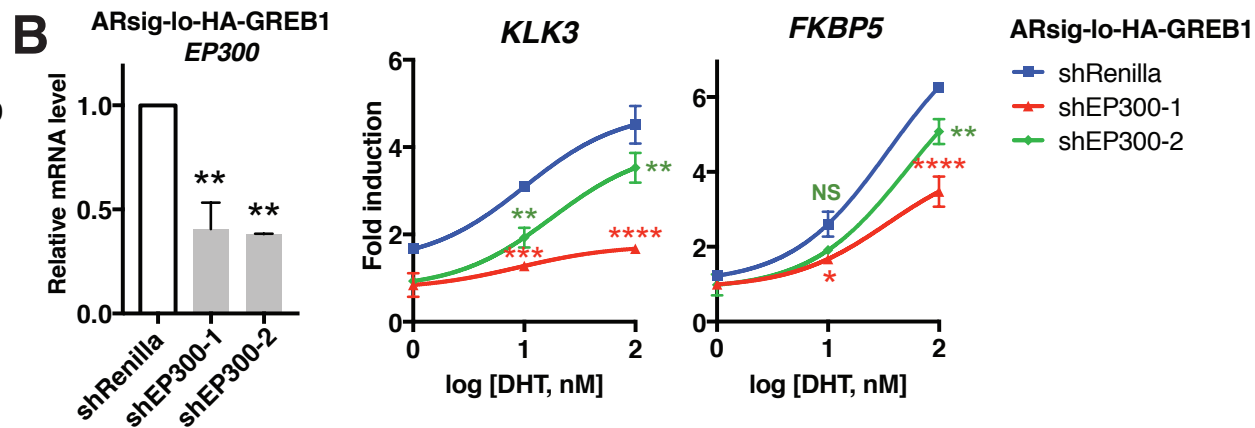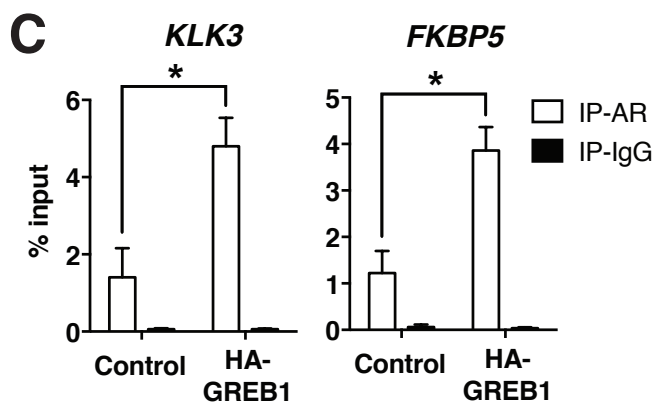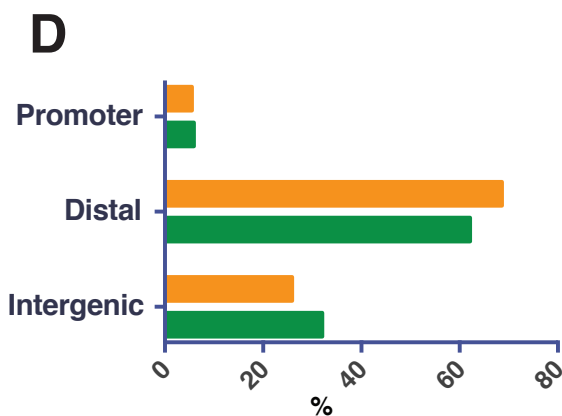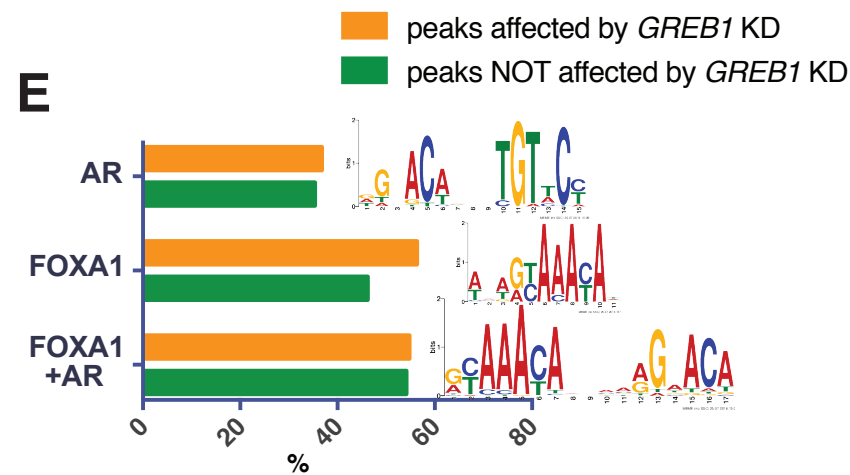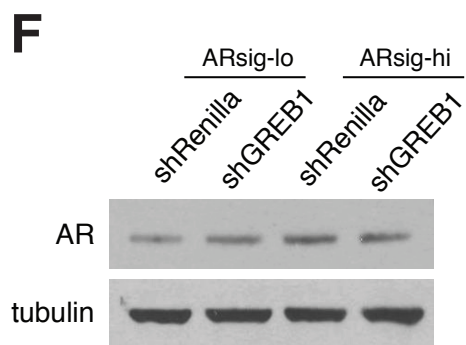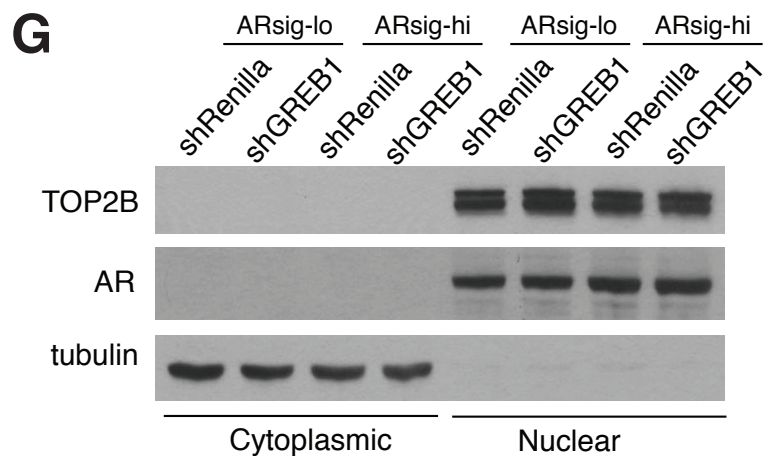

Supplement: supp [file elife-41913-supp-v1.zip]

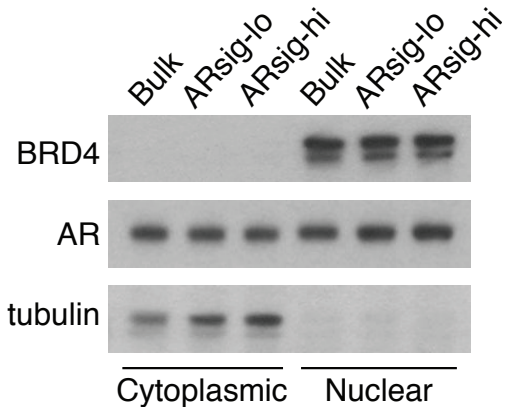

Supplement: supp [file elife-41913-supp-v1.zip]

**A**

CWR22Pc-EP  
*GREB1*

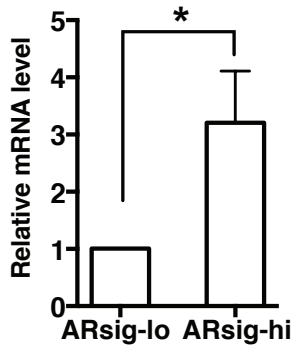**B**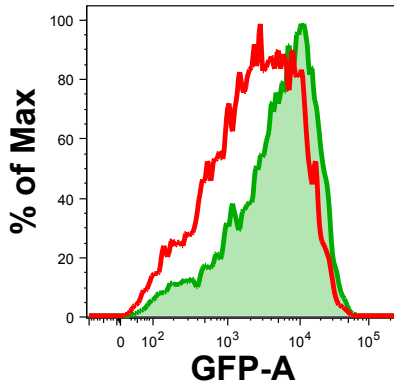

shRenilla

shGREB1

Supplement: supp [file elife-41913-supp-v1.zip]

**A**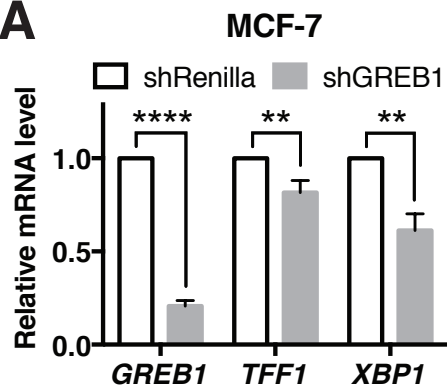**B**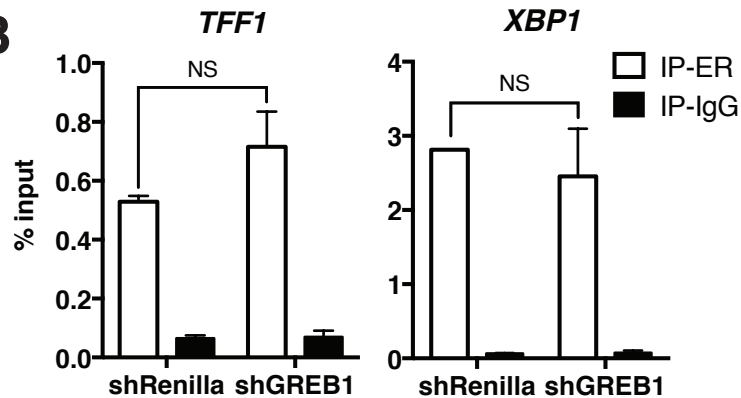**C**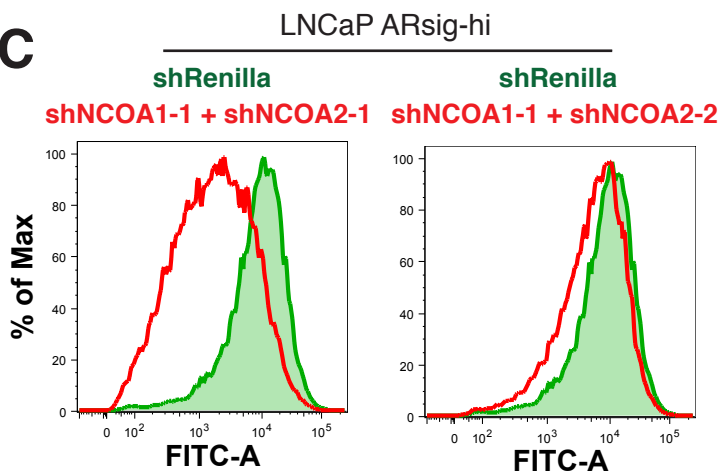**D**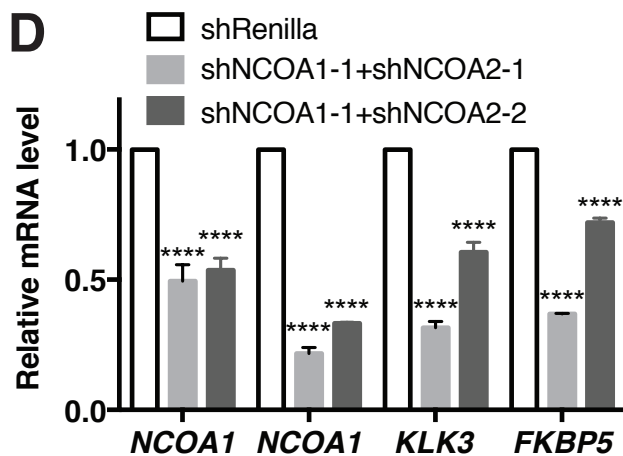**E**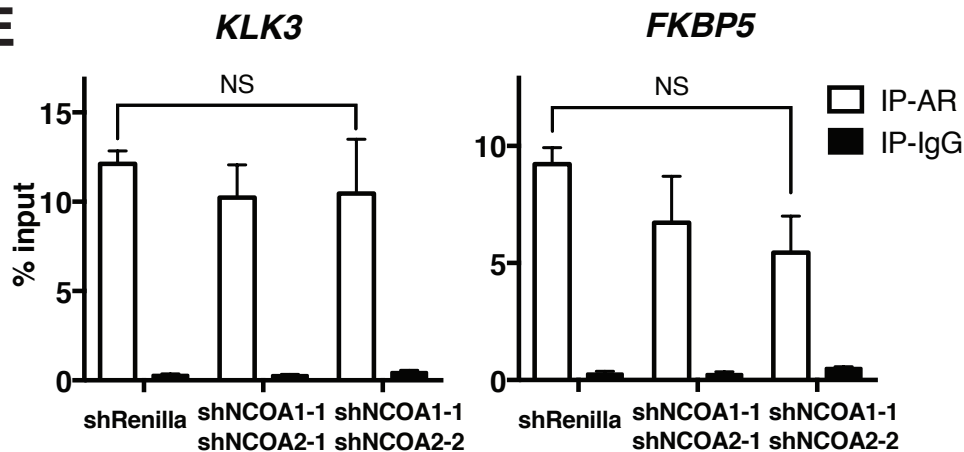

Supplement: supp [file elife-41913-supp-v1.zip]
